# Supplementary material for: Global estimate of the prevalence of post-traumatic stress disorder among adults living with HIV: a systematic review and meta-analysis
Source: PubMed Central journal article supplement — BMJ Open. 2020 Apr 27;10(4):e032435. doi: 10.1136/bmjopen-2019-032435 (PMC7213849; doi:10.1136/bmjopen-2019-032435), 2020-04-27
Supplement: bmjopen-2019-032435.draft_revisions.pdf [file bmjopen-2019-032435.draft_revisions.pdf]

# BMJ Open

BMJ Open is committed to open peer review. As part of this commitment we make the peer review history of every article we publish publicly available.

When an article is published we post the peer reviewers' comments and the authors' responses online. We also post the versions of the paper that were used during peer review. These are the versions that the peer review comments apply to.

The versions of the paper that follow are the versions that were submitted during the peer review process. They are not the versions of record or the final published versions. They should not be cited or distributed as the published version of this manuscript.

BMJ Open is an open access journal and the full, final, typeset and author-corrected version of record of the manuscript is available on our site with no access controls, subscription charges or pay-per-view fees (<http://bmjopen.bmj.com>).

If you have any questions on BMJ Open's open peer review process please email [info.bmjopen@bmj.com](mailto:info.bmjopen@bmj.com)

# BMJ Open

## **A global estimate of the prevalence of posttraumatic stress disorder among adults living with HIV: A systematic review and meta-analysis**

|                               |                                                                                                                                                                                                                                                                                                             |
|-------------------------------|-------------------------------------------------------------------------------------------------------------------------------------------------------------------------------------------------------------------------------------------------------------------------------------------------------------|
| Journal:                      | <i>BMJ Open</i>                                                                                                                                                                                                                                                                                             |
| Manuscript ID                 | bmjopen-2019-032435                                                                                                                                                                                                                                                                                         |
| Article Type:                 | Research                                                                                                                                                                                                                                                                                                    |
| Date Submitted by the Author: | 20-Jun-2019                                                                                                                                                                                                                                                                                                 |
| Complete List of Authors:     | TANG, chulei; Central South University Xiangya School of Nursing, Goldsamt, Lloyd; NYU College of Nursing, Meng, Jingjing; Central South University Xiao, Xueling; Central South University Zhang, Li; Central South University Williams, Ann; New York University Wang, Honghong; Central South University |
| Keywords:                     | Posttraumatic stress disorder, HIV/AIDS, Prevalence, Meta-analysis                                                                                                                                                                                                                                          |
|                               |                                                                                                                                                                                                                                                                                                             |

SCHOLARONE™  
Manuscripts

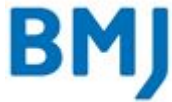

I, the Submitting Author has the right to grant and does grant on behalf of all authors of the Work (as defined in the below author licence), an exclusive licence and/or a non-exclusive licence for contributions from authors who are: i) UK Crown employees; ii) where BMJ has agreed a CC-BY licence shall apply, and/or iii) in accordance with the terms applicable for US Federal Government officers or employees acting as part of their official duties; on a worldwide, perpetual, irrevocable, royalty-free basis to BMJ Publishing Group Ltd ("BMJ") its licensees and where the relevant Journal is co-owned by BMJ to the co-owners of the Journal, to publish the Work in this journal and any other BMJ products and to exploit all rights, as set out in our [licence](#).

The Submitting Author accepts and understands that any supply made under these terms is made by BMJ to the Submitting Author unless you are acting as an employee on behalf of your employer or a postgraduate student of an affiliated institution which is paying any applicable article publishing charge ("APC") for Open Access articles. Where the Submitting Author wishes to make the Work available on an Open Access basis (and intends to pay the relevant APC), the terms of reuse of such Open Access shall be governed by a Creative Commons licence – details of these licences and which [Creative Commons](#) licence will apply to this Work are set out in our licence referred to above.

Other than as permitted in any relevant BMJ Author's Self Archiving Policies, I confirm this Work has not been accepted for publication elsewhere, is not being considered for publication elsewhere and does not duplicate material already published. I confirm all authors consent to publication of this Work and authorise the granting of this licence.

**TITLE PAGE**

**Title:** A global estimate of the prevalence of posttraumatic stress disorder among adults living with HIV: A systematic review and meta-analysis

**Running head:** Posttraumatic stress disorder, HIV, Prevalence, Meta-analysis

**Authors:**

1. Chulei TANG, BSN, RN

Xiangya School of Nursing, Central South University, Changsha, China

ORCID: 0000-0003-3178-5130

2. Lloyd A Goldsamt, PhD, Senior Research Scientist

Rory Meyers College of Nursing, New York University, 433 First Avenue, New York 10013, USA

3. Jingjing MENG, BSN, RN

Xiangya School of Nursing, Central South University, Changsha, China

4. Xueling XIAO, MSN, RN

Xiangya School of Nursing, Central South University, Changsha, China

5. Li ZHANG, MSN, RN

Xiangya School of Nursing, Central South University, Changsha, China

6. Ann Bartley Williams, PhD, Professor

Rory Meyers College of Nursing, New York University, 433 First Avenue, New York 10013, USA

7. Honghong WANG, RN, MSN, PhD, Professor

Xiangya School of Nursing, Central South University, Changsha, China.

1  
2  
3  
4 **Corresponding author**

5  
6 Honghong WANG

7  
8 Xiangya School of Nursing, Central South University

9  
10 172 Tongzipo road, Changsha 410013, Hunan, China

11  
12  
13 Email: honghong\_wang@hotmail.com

14  
15 Telephone number: 0731-82650270

16  
17 Fax number: 0731-82650270

18  
19  
20  
21 **Keywords** Posttraumatic stress disorder, HIV/AIDS, Prevalence, Meta-analysis

22  
23 **Word count: 3505 words**

24  
25  
26  
27  
28  
29  
30  
31  
32  
33  
34  
35  
36  
37  
38  
39  
40  
41  
42  
43  
44  
45  
46  
47  
48  
49  
50  
51  
52  
53  
54  
55  
56  
57  
58  
59  
60

peer review only

1  
2  
3  
4  
5 **A global estimate of the prevalence of posttraumatic stress disorder among adults**  
6  
7 **living with HIV: A systematic review and meta-analysis**  
8  
9

10  
11  
12  
13 **ABSTRACT**  
14

15 **Objectives** Although HIV-infected patients have been disproportionately affected by  
16 posttraumatic stress disorder (PTSD), the global prevalence of PTSD among people  
17 living with HIV (PLWH) is unknown. This study aimed to systematically review the  
18 prevalence of PTSD among PLWH worldwide and explore variation in prevalence  
19 across sociodemographic and methodological factors.  
20  
21  
22  
23  
24  
25  
26  
27

28 **Design** A meta-analysis using a random-effect model was conducted to pool the  
29 prevalence estimated from individual studies, and subgroup analyses were used to  
30 analyze heterogeneities.  
31  
32  
33  
34  
35

36 **Setting, participants and measures** Observational studies providing PTSD prevalence  
37 in an adult HIV population were included. Measurements were not restricted except that  
38 the definition of PTSD should be in accordance with the Diagnostic and Statistical  
39 Manual of Mental Disorders (DSM) or the International Classification of Diseases (ICD)  
40 diagnostic criteria.  
41  
42  
43  
44  
45  
46  
47  
48

49 **Results** A total of 34 articles were included among 2396 records identified initially. The  
50 estimated global rate of PTSD in PLWH was 27% (95% CI 23-31%). Significant  
51 heterogeneity was detected in the proportion of PLWH who reported PTSD across  
52 studies, which was partially explained by geographic area, population group,  
53  
54  
55  
56  
57  
58  
59  
60

1  
2  
3  
4  
5 measurement and sampling method ( $p<0.05$ ).  
6

7 **Conclusion** PTSD among PLWH is common worldwide. We strongly suggest that  
8  
9 PTSD should be routinely screened for and that more effective prevention strategies and  
10  
11  
12  
13 treatment packages targeting PTSD are needed in PLWH.  
14  
15

### 16 17 18 **Strengths and limitations of this study** 19

- 20 ● This is the first meta-analysis providing comprehensive assessment on the  
21  
22 prevalence of posttraumatic stress disorder (PTSD) among adults living with HIV.  
23  
24
- 25 ● Several subgroup analyses were conducted to examine the influence of diverse  
26  
27 sociodemographic backgrounds as well as methodological heterogeneity.  
28  
29
- 30 ● This review was conducted with specified definition of PTSD in inclusion criteria  
31  
32 to help in acquiring high level of evidence, which also limited the number of  
33  
34  
35  
36  
37  
38  
39  
40  
41  
42  
43  
44  
45  
46  
47  
48  
49  
50  
51  
52  
53  
54  
55  
56  
57  
58  
59  
60  
60  
eligible studies.
- A lack of studies carried out on the topic in low-income and middle-income  
countries could underestimate the burden of HIV-PTSD prevalence of the world.

## INTRODUCTION

Globally, there were more than 36 million people living with HIV (PLWH) by the end of 2017.<sup>1</sup> Although increasingly expanded access to antiretroviral therapy (ART) has lead to a prolonged life span, a large portion of PLWH still suffer a significant burden due to psychiatric disorders.<sup>2,3</sup> A growing body of literature recognizes HIV infection as a traumatic event,<sup>4,5</sup> and HIV-infected people have a heightened risk for posttraumatic stress disorder (PTSD). PTSD is a mental health condition following exposure to a life-threatening event, or extreme or repeated exposure to traumatic events.<sup>6</sup> Infection with HIV not only causes a progressive destruction of the immune system, which increases the susceptibility to malignancies that threaten a person's life greatly, but being labeled and associated with HIV stigma, taking multiple daily medications and experiencing repeated unpleasant side effects also constitute traumatic events.<sup>7</sup> PLWH are more likely to report a history of traumatic and stressful life experiences than found in the general population, including childhood sexual/physical abuse and intimate partner violence.<sup>8-10</sup> These high rates of previous trauma exposure among PLWH increase the likelihood of developing PTSD.

Generally, the concept of PTSD has been broadly applied to military veterans, survivors of disasters and accidents, and victims of violent assaults. PTSD as a serious and costly health problem in the general population also is well recognized, which not only impairs a person's physical health, but also greatly influences social functioning.<sup>11</sup> The co-occurrence of PTSD and HIV-infection creates even more challenges regarding



1  
2  
3  
4  
5 both the treatment of PTSD and the management of HIV. PTSD can negatively impact  
6  
7 medication adherence and impair immune functioning,<sup>12-15</sup> all of which are especially  
8  
9 critical for PLWH. HIV-infected patients with PTSD have been found to be at increased  
10  
11 risk of somatization and physical disorders.<sup>16</sup> The illness experience of PTSD, such as  
12  
13 persistent avoidance and re-experiencing the traumatic event, may also compromise  
14  
15 quality of life and cause significant distress in PLWH.<sup>7 17</sup> Subsequently, prolonged and  
16  
17 untreated PTSD may lead to exacerbation of both PTSD and HIV progression.<sup>18</sup> There  
18  
19 is also evidence suggesting that reductions in PTSD symptom severity are related to  
20  
21 improved HIV-risk related outcomes.<sup>19</sup> Given that PTSD elevates HIV-risk behaviors<sup>20</sup>  
22  
23 <sup>21</sup> and the possibility of HIV transmission also increases along with disease progression,  
24  
25 PLWH suffering from PTSD are an important group to understand and with whom to  
26  
27 intervene.  
28  
29  
30  
31  
32  
33  
34  
35

36 Valid data on PTSD prevalence rates among PLWH is essential. Evidence on the  
37  
38 extent of PTSD among PLWH is needed to raise awareness and recommend clinical  
39  
40 management. Although a number of studies have investigated the prevalence of PTSD  
41  
42 in PLWH, findings have been inconsistent.<sup>22</sup> While studies have reported varied  
43  
44 incidence, few efforts have been made to aggregate existing research using  
45  
46 meta-analysis techniques. There was one published meta-analysis estimating the pooled  
47  
48 prevalence of PTSD among women living with HIV in 2012.<sup>23</sup> But the lack of studies  
49  
50 with other groups lowered the generalizability and global relevance of their findings.  
51  
52 Moreover, the meta-analysis was conducted in 2012, and an increase of publications  
53  
54  
55  
56  
57  
58  
59  
60

1  
2  
3  
4  
5 about PTSD among PLWH since then<sup>24-26</sup> suggests that a timely update is urgently  
6  
7  
8 needed. Indeed, several reviews provide a useful overview of the possible prevalence of  
9  
10 PTSD among PLWH;<sup>22-27</sup> however, a number of gaps remain. First, to date, there has  
11  
12 been no attempt to achieve a better understanding of the epidemiology of PTSD in  
13  
14 PLWH and the reviews did not aim at an overall PTSD prevalence specifically. Second,  
15  
16 economically and politically, while precise estimates of prevalence can support efficient  
17  
18 allocation of resources, factors that might influence PTSD prevalence rates, such as  
19  
20  
21 population characteristics and socio-cultural context have been neglected.  
22  
23  
24

25  
26 Therefore, to fill these knowledge gaps, we aimed to provide an estimate for the  
27  
28 worldwide prevalence of PTSD in PLWH and to test whether PTSD prevalence in  
29  
30 PLWH differs based upon population group, country income groups and study  
31  
32 characteristics. This information can then be used to inform further practice and  
33  
34 research for this highly co-morbid group.  
35  
36  
37

## 38 **METHODS**

### 39 **Search strategy**

40  
41  
42 Systematic searches were conducted through 5 electronic English databases (Medline,  
43  
44 Web of Science, CINAHL, EMBASE and Cochrane Library) and 3 Chinese databases  
45  
46 (CNKI, Wanfang Database, Sinomed) to identify published studies on PTSD prevalence  
47  
48 among PLWH up to May 2018. The search terms were: posttrauma\*, post trauma\*,  
49  
50 post-trauma\*, stress disorder\*, OR PTSD; AND HIV, acquired immunodeficiency  
51  
52 syndrome, AIDS, OR PLWH\$; AND epidemiology, occurrence, incidence, OR  
53  
54  
55  
56  
57  
58  
59  
60

1  
2  
3  
4  
5 prevalence. The reference lists of review articles and retrieved full-text articles were  
6  
7 also examined for additional papers that were eligible for this review.  
8  
9

### 10 **Eligibility criteria**

11  
12 Studies were included for this meta-analysis if they met the following predetermined  
13  
14 selection criteria: (1) published in Chinese or English in a peer reviewed journal; (2)  
15  
16 observational study where prevalence figures for PTSD were stated or can be calculated  
17  
18 in an adult HIV population; and (3) underlined that PTSD cases were identified in  
19  
20 accordance with the Diagnostic and Statistical Manual of Mental Disorders (DSM) or  
21  
22 the International Classification of Diseases (ICD) diagnostic criteria.<sup>28 29</sup> Studies were  
23  
24 excluded if (1) they only recruited those who had mental distress; (2) they specifically  
25  
26 targeted only youth under 18 or children affected by HIV; or (3) participants had been  
27  
28 exposed to war, genocide or natural disasters. No restriction was applied regarding  
29  
30 gender, nationality, or sexual orientation. Additionally, articles were reviewed closely,  
31  
32 and if repeated data were observed, only the earlier publication with one set of complete  
33  
34 data was included.  
35  
36  
37  
38  
39  
40  
41  
42  
43

### 44 **Data extraction and analysis**

45  
46 Screening of papers was carried out by three of the authors (C.T., J.M. and X.X.)  
47  
48 following PRISMA recommendations. C.T and X.X. searched the English papers and  
49  
50 J.M. screened the Chinese language papers. After duplicates were deleted, each  
51  
52 investigator read titles and abstracts closely to capture all potential studies. Full-text  
53  
54 articles were obtained and reviewed for all criteria. Any discrepancies were resolved by  
55  
56  
57  
58  
59  
60

1  
2  
3  
4  
5 discussion with the research team. The PRISMA flow chart shows the results of the  
6  
7 systematic search (figure 1)  
8  
9

### 10 **Data extraction**

11  
12 Two authors (C.T. and X.X.) used a data extraction sheet to capture the following data  
13  
14 independently from included papers: first author, year of publication, country of study,  
15  
16 sampling method, sample size, number of patients with PTSD, measurements and  
17  
18 outcome data. The third investigator (H.W.) helped to verify all extracted data and  
19  
20 resolve any uncertainties. To facilitate detection of sample/methodological  
21  
22 heterogeneity, countries were categorized according to their income level, and  
23  
24 measurements were classified into diagnostic questionnaire and clinical interview based  
25  
26 on the approach to diagnosing PTSD. Selection bias was also examined. Gender and  
27  
28 sexual orientation were considered because of underlying differences in the epidemics  
29  
30 of HIV and trauma.<sup>30–32</sup> Specifically, populations were grouped as women and men, and  
31  
32 samples of HIV-infected men were further classified into men who have sex with men  
33  
34 (MSM) and non-MSM males.  
35  
36  
37  
38  
39  
40  
41  
42  
43

### 44 **Assessment of methodological quality**

45  
46 We used the quality assessment forms for cross-sectional/prevalence studies  
47  
48 recommended by the Agency for Healthcare Research and Quality (AHRQ)<sup>33</sup> to assess  
49  
50 the reliability of the eligible studies. The checklist included 11 items. Each item was  
51  
52 coded with a “Yes/No/Unclear”: “No” or “Unclear” was scored “0”, and “Yes” was  
53  
54 scored “1”. Consistent with previous meta-analyses studies using AHRQ, a total score  
55  
56  
57  
58  
59  
60

of 8-11, 4-7, and 0-3 indicated high, moderate and low quality, respectively.

### **Meta-analysis**

In this study, all statistical analyses were performed using Stata 12.0 software (STATA Corporation, College Station, TX). Heterogeneity was tested and quantified by the chi-square Q statistic and the  $I^2$  statistic. The rates of PTSD among PLWH were combined and reported as proportions with corresponding 95% Confidential Intervals (CI). The pooled prevalence was estimated using a random-effects model when heterogeneity was statistically significant ( $I^2 > 50\%$ ,  $p \leq 0.10$ ). Otherwise, a fix-effects model was conducted.<sup>34</sup> As sources of heterogeneity may arise from socio-demographic and methodological factors, subgroup analyses were performed to assess the effects of (1) economic levels of the study country, (2) gender/sexual orientation, (3) sampling method and (4) measure type on the prevalence of PTSD among PLWH. Chi-square tests were further used to investigate whether there were significant differences between groups. We only performed these subgroup analyses when data were extractable and sufficient. Separate sensitivity analyses were used for studies with low quality to examine the stability of the pooled prevalence. Publication bias was assessed using the Egger's and the Begg's tests. Significant level of  $p$  values  $< 0.05$  were employed for all analyses.

### **Patient and public involvement**

Patients and the public were not involved in this study.

## **RESULTS**

## Search results

A total of 2396 records were identified by the electronic bibliographic database searches. Eight additional manuscripts were identified through other sources (e.g., reference lists of review papers). From an initial screen of 2299 records after duplicates were removed, 2185 records were excluded on basis of title or abstract because those studies were not relevant to this review (n=2107) or were reviews/commentary (n= 78). The remaining 114 full articles were selected for the eligibility assessment. Of those, 5 were excluded for repeated data, 9 were excluded for targeting PLWH who received psychological intervention or suffered from genocide/natural disaster, and 66 were excluded for not reporting the PTSD prevalence among PLWH. Finally, a total of 34 studies<sup>14 24 25 35-65</sup> met inclusion criteria and were included in this meta-analysis. Search results are elaborated in Figure 1.

## Study characteristics

Most of the papers (82.4%) scored 4 or more according to the AHRQ scale indicating a generally moderate to high level of data quality. Table 1 shows the characteristics of the included studies. These studies were published between 2002<sup>65</sup> and 2018.<sup>35-37</sup>

Geographically, over half (n=20, 58.8%) of the 34 included studies were conducted in the USA, followed by South Africa (n=6, 17.6%), the United Kingdom (n=2, 5.9%), China (n=2, 5.9%), and low-income countries including Gambia (n=1, 2.9%), Nigeria (n=1, 2.9%), Uganda (n=1, 2.9%), and Zimbabwe (n=1, 2.9%). Twenty-one studies (61.8%) measured PTSD using diagnostic self-report questionnaires, while the other 13

1  
2  
3  
4  
5 studies (38.2%) conducted clinical interviews to diagnose PTSD. Though 6 studies  
6  
7 (17.6%) did not report their sampling methods, convenience sampling methods were  
8  
9 adopted in most studies (n=18, 52.9%), followed by consecutive sampling (n=7, 20.6%),  
10  
11 and probability sampling (n=3, 8.8%). In all, 10161 PLWH were involved (sample size  
12  
13 varied from 41 to 1489), of which 2088 were identified with PTSD.  
14  
15  
16  
17  
18  
19  
20  
21  
22  
23  
24  
25  
26  
27  
28  
29  
30  
31  
32  
33  
34  
35  
36  
37  
38  
39  
40  
41  
42  
43  
44  
45  
46  
47  
48  
49  
50  
51  
52  
53  
54  
55  
56  
57  
58  
59  
60

For peer review only

**Table 1 Characteristics of the included studies**

| First author             | Year of publication | Location of study | Sampling methods     | Sample size* | No. of patients with PTSD | Measurements | Data Collection           | Quality  |
|--------------------------|---------------------|-------------------|----------------------|--------------|---------------------------|--------------|---------------------------|----------|
| Spies <sup>35</sup>      | 2018                | South Africa      | convenient sampling  | 68           | 10                        | DTS          | self-report questionnaire | moderate |
| Verhey <sup>36</sup>     | 2018                | Zimbabwe          | random sampling      | 91           | 22                        | CAPS         | clinical interview        | moderate |
| Gao <sup>37</sup>        | 2018                | China             | convenient sampling  | 520          | 89                        | PCL-C        | self-report questionnaire | moderate |
| McLean <sup>38</sup>     | 2017                | USA               | convenient sampling  | 42           | 12                        | PSS          | clinical interview        | moderate |
| Kemppainen <sup>25</sup> | 2017                | USA               | convenient sampling  | 60           | 26                        | PCL-C        | self-report questionnaire | low      |
| Gonzalez <sup>24</sup>   | 2016                | USA               | convenient sampling  | 137          | 47                        | PDS          | self-report questionnaire | moderate |
| Rubin <sup>39</sup>      | 2016                | USA               | convenient sampling  | 1004         | 174                       | PCL-C        | self-report questionnaire | moderate |
| John <sup>40</sup>       | 2016                | USA               | consecutive sampling | 359          | 44                        | Breslau      | self-report questionnaire | moderate |
| Julnes <sup>14</sup>     | 2016                | USA               | convenient sampling  | 114          | 39                        | CDQ          | self-report questionnaire | moderate |



|    |                           |      |              |                      |      |     |                 |                           |          |
|----|---------------------------|------|--------------|----------------------|------|-----|-----------------|---------------------------|----------|
| 1  |                           |      |              |                      |      |     |                 |                           |          |
| 2  |                           |      |              |                      |      |     |                 |                           |          |
| 3  |                           |      |              |                      |      |     |                 |                           |          |
| 4  |                           |      |              |                      |      |     |                 |                           |          |
| 5  | Zhang <sup>41</sup>       | 2016 | China        | convenient sampling  | 243  | 106 | PCL-C           | self-report questionnaire | low      |
| 6  |                           |      |              |                      |      |     |                 |                           |          |
| 7  |                           |      |              |                      |      |     |                 |                           |          |
| 8  | Battaglia <sup>42</sup>   | 2015 | USA          | convenient sampling  | 200  | 72  | PTSD checklist  | self-report questionnaire | moderate |
| 9  |                           |      |              |                      |      |     |                 |                           |          |
| 10 |                           |      |              |                      |      |     |                 |                           |          |
| 11 | Hansrod <sup>43</sup>     | 2015 | South Africa | convenient sampling  | 114  | 29  | MINI            | clinical interview        | moderate |
| 12 |                           |      |              |                      |      |     |                 |                           |          |
| 13 |                           |      |              |                      |      |     |                 |                           |          |
| 14 | Brownley <sup>44</sup>    | 2015 | USA          | unclear              | 220  | 78  | PSS             | self-report questionnaire | moderate |
| 15 |                           |      |              |                      |      |     |                 |                           |          |
| 16 |                           |      |              |                      |      |     |                 |                           |          |
| 17 |                           |      |              |                      |      |     |                 |                           |          |
| 18 | Malee <sup>45</sup>       | 2014 | USA          | convenient sampling  | 1223 | 281 | CDQ             | self-report questionnaire | high     |
| 19 |                           |      |              |                      |      |     |                 |                           |          |
| 20 |                           |      |              |                      |      |     |                 |                           |          |
| 21 | Glémaud <sup>46</sup>     | 2014 | USA          | unclear              | 96   | 33  | PRIME MD<br>PHQ | clinical interview        | low      |
| 22 |                           |      |              |                      |      |     |                 |                           |          |
| 23 |                           |      |              |                      |      |     |                 |                           |          |
| 24 | Gore-Felton <sup>47</sup> | 2013 | USA          | convenient sampling  | 94   | 28  | PCL-C           | self-report questionnaire | low      |
| 25 |                           |      |              |                      |      |     |                 |                           |          |
| 26 |                           |      |              |                      |      |     |                 |                           |          |
| 27 | Glover <sup>48</sup>      | 2013 | USA          | convenient sampling  | 99   | 24  | PDS             | self-report questionnaire | high     |
| 28 |                           |      |              |                      |      |     |                 |                           |          |
| 29 |                           |      |              |                      |      |     |                 |                           |          |
| 30 | Peterson <sup>49</sup>    | 2012 | Gambia       | consecutive sampling | 153  | 46  | IES-R           | self-report questionnaire | high     |
| 31 |                           |      |              |                      |      |     |                 |                           |          |
| 32 |                           |      |              |                      |      |     |                 |                           |          |
| 33 |                           |      |              |                      |      |     |                 |                           |          |
| 34 | Kinyanda <sup>50</sup>    | 2011 | Uganda       | consecutive sampling | 618  | 10  | MINI            | clinical interview        | moderate |
| 35 |                           |      |              |                      |      |     |                 |                           |          |
| 36 |                           |      |              |                      |      |     |                 |                           |          |
| 37 | Bogart <sup>51</sup>      | 2011 | USA          | convenient sampling  | 181  | 72  | PDS             | self-report questionnaire | moderate |
| 38 |                           |      |              |                      |      |     |                 |                           |          |
| 39 |                           |      |              |                      |      |     |                 |                           |          |
| 40 |                           |      |              |                      |      |     |                 |                           |          |
| 41 |                           |      |              |                      |      |     |                 |                           |          |
| 42 |                           |      |              |                      |      |     |                 |                           |          |
| 43 |                           |      |              |                      |      |     |                 |                           |          |
| 44 |                           |      |              |                      |      |     |                 |                           |          |
| 45 |                           |      |              |                      |      |     |                 |                           |          |
| 46 |                           |      |              |                      |      |     |                 |                           |          |

|    |                         |      |              |                      |     |     |                |                           |          |
|----|-------------------------|------|--------------|----------------------|-----|-----|----------------|---------------------------|----------|
| 1  |                         |      |              |                      |     |     |                |                           |          |
| 2  |                         |      |              |                      |     |     |                |                           |          |
| 3  |                         |      |              |                      |     |     |                |                           |          |
| 4  |                         |      |              |                      |     |     |                |                           |          |
| 5  | Martin <sup>52</sup>    | 2011 | UK           | convenient sampling  | 85  | 46  | CIDI           | clinical interview        | moderate |
| 6  |                         |      |              |                      |     |     |                |                           |          |
| 7  |                         |      |              |                      |     |     |                |                           |          |
| 8  | Reisner <sup>53</sup>   | 2011 | USA          | convenient sampling  | 63  | 16  | AUDADIS-IV     | clinical interview        | moderate |
| 9  |                         |      |              |                      |     |     |                |                           |          |
| 10 |                         |      |              |                      |     |     |                |                           |          |
| 11 | Theuninck <sup>54</sup> | 2010 | UK           | convenient sampling  | 100 | 33  | PCL-C          | self-report questionnaire | low      |
| 12 |                         |      |              |                      |     |     |                |                           |          |
| 13 |                         |      |              |                      |     |     |                |                           |          |
| 14 | Joska <sup>55</sup>     | 2010 | South Africa | unclear              | 536 | 164 | HTS            | self-report questionnaire | moderate |
| 15 |                         |      |              |                      |     |     |                |                           |          |
| 16 |                         |      |              |                      |     |     |                |                           |          |
| 17 | Adewuya <sup>56</sup>   | 2009 | Nigeria      | unclear              | 190 | 52  | MINI           | clinical interview        | moderate |
| 18 |                         |      |              |                      |     |     |                |                           |          |
| 19 |                         |      |              |                      |     |     |                |                           |          |
| 20 | Spies <sup>57</sup>     | 2009 | South Africa | unclear              | 429 | 92  | MINI           | clinical interview        | moderate |
| 21 |                         |      |              |                      |     |     |                |                           |          |
| 22 |                         |      |              |                      |     |     |                |                           |          |
| 23 |                         |      |              |                      |     |     |                |                           |          |
| 24 | Fincham <sup>58</sup>   | 2008 | South Africa | consecutive sampling | 456 | 23  | MINI           | clinical interview        | moderate |
| 25 |                         |      |              |                      |     |     |                |                           |          |
| 26 |                         |      |              |                      |     |     |                |                           |          |
| 27 | Zanjani <sup>59</sup>   | 2007 | USA          | random sampling      | 109 | 13  | MINI           | clinical interview        | moderate |
| 28 |                         |      |              |                      |     |     |                |                           |          |
| 29 |                         |      |              |                      |     |     |                |                           |          |
| 30 | Israelski <sup>60</sup> | 2007 | USA          | unclear              | 210 | 71  | PCL-C          | self-report questionnaire | low      |
| 31 |                         |      |              |                      |     |     |                |                           |          |
| 32 |                         |      |              |                      |     |     |                |                           |          |
| 33 |                         |      |              |                      |     |     |                |                           |          |
| 34 | Boarts <sup>61</sup>    | 2006 | USA          | convenient sampling  | 57  | 24  | PDS            | self-report questionnaire | moderate |
| 35 |                         |      |              |                      |     |     |                |                           |          |
| 36 |                         |      |              |                      |     |     |                |                           |          |
| 37 | Leserman <sup>62</sup>  | 2005 | USA          | consecutive sampling | 611 | 98  | PTSD checklist | self-report questionnaire | high     |
| 38 |                         |      |              |                      |     |     |                |                           |          |
| 39 |                         |      |              |                      |     |     |                |                           |          |
| 40 |                         |      |              |                      |     |     |                |                           |          |
| 41 |                         |      |              |                      |     |     |                |                           |          |
| 42 |                         |      |              |                      |     |     |                |                           |          |
| 43 |                         |      |              |                      |     |     |                |                           |          |
| 44 |                         |      |              |                      |     |     |                |                           |          |
| 45 |                         |      |              |                      |     |     |                |                           |          |
| 46 |                         |      |              |                      |     |     |                |                           |          |

|    |                        |      |              |                      |      |     |       |                           |          |
|----|------------------------|------|--------------|----------------------|------|-----|-------|---------------------------|----------|
| 1  |                        |      |              |                      |      |     |       |                           |          |
| 2  |                        |      |              |                      |      |     |       |                           |          |
| 3  |                        |      |              |                      |      |     |       |                           |          |
| 4  |                        |      |              |                      |      |     |       |                           |          |
| 5  | Olley <sup>63</sup>    | 2003 | South Africa | consecutive sampling | 149  | 42  | MINI  | clinical interview        | moderate |
| 6  |                        |      |              |                      |      |     |       |                           |          |
| 7  |                        |      |              |                      |      |     |       |                           |          |
| 8  | Vitiello <sup>64</sup> | 2003 | USA          | probability sample   | 1489 | 155 | CIDI  | clinical interview        | moderate |
| 9  |                        |      |              |                      |      |     |       |                           |          |
| 10 |                        |      |              |                      |      |     |       |                           |          |
| 11 | Martinez <sup>65</sup> | 2002 | USA          | consecutive sampling | 41   | 17  | PCL-C | self-report questionnaire | moderate |
| 12 |                        |      |              |                      |      |     |       |                           |          |
| 13 | <hr/>                  |      |              |                      |      |     |       |                           |          |

\* Total number of adults living with HIV

14

15

16

17 *PCL-C* Posttraumatic Stress Disorder Checklist-Civilian Version; *DTS* Davidson Trauma Scale; *CAPS* Clinician Administered

18

19 Post-traumatic Stress Scale; *CDQ* Client Diagnostic Questionnaire; *PDS* Posttraumatic Stress Diagnostic Scale – Self-report version; *PSS*

20

21 Posttraumatic Stress Symptom Scale; *PRIME MD PHQ* Primary Care Evaluation of Mental Disorders Patient Health Questionnaire;

22

23 *AUDADIS-IV* The Alcohol Use Disorder and Associated Disabilities Interview Schedule-IV; *MINI* Mini-International Neuropsychiatric

24

25 Interview; *IES-R* Impact of Event Scale-Revised; *HTS* the Harvard trauma scale; *DIS-IV* Diagnostic Interview Schedule for DSM-IV

26

27 diagnoses; *PTSD checklist* Posttraumatic Stress Disorder Checklist; *CIDI* Clinical Interview for Diagnosis for DSM-IV

28

29

30

31

32

33

34

35

36

37

38

39

40

41

42

43

44

45

46

## Prevalence of PTSD in PLWH

The reported prevalence of PTSD in PLWH ranged from 1.6%<sup>50</sup> to 54.1%<sup>52</sup>. The overall pooled prevalence was 27% (95%CI: 23% to 31%), estimated by a random effects model, as significant heterogeneity ( $p \leq 0.001$ ,  $I^2=97.5\%$ ) was observed among the included studies. Meta-analyses are shown as forest plots (Fig. 2).

## Publication bias and sensitivity analysis

Possible publication bias was indicated according to the results of Egger's linear test ( $t=8.07$ ,  $p < 0.05$ ) and Begg's rank test ( $z=0.39$ ,  $p=0.70$ ). However, low sensitivity was suggested with the pooled prevalence of PTSD changed slightly from 27% (95%CI: 23% to 31%) to 25% (95%CI: 20% to 29%) after excluding low-quality articles.

## Subgroup Analyses

The results of subgroup analyses are shown in Table 2. The prevalence of PTSD in PLWH differed significantly by geographic area, population group, sampling and measurement method. Specifically, the proportion of PLWH with PTSD in high-income countries tended to be higher (pooled rate= 29%, 95%CI 25% to 34%) than middle-income countries (pooled rate= 23%, 95%CI 14% to 32%) and low-income countries (pooled rate= 21%, 95%CI 3% to 39%). Studies using clinical interviews reported lower rates of PTSD (pooled rate= 22%, 95%CI 16% to 27%) compared with those using self-report questionnaires (pooled rate= 29%, 95%CI 25% to 33%). The pooled PTSD prevalence among HIV-positive MSM, HIV-positive women and non-MSM men were 33% (95%CI: 29% to 38%), 24% (95%CI: 22% to 25%) and 20%

1  
2  
3  
4  
5 (95%CI: 17% to 23%), respectively. Also, studies conducted with convenience  
6  
7  
8 sampling were more likely to achieve higher PTSD prevalence (pooled rate= 31%,  
9  
10 95%CI 26% to 36%) than those using consecutive sampling (pooled rate= 17%, 95%CI  
11  
12  
13 10% to 24%).  
14  
15  
16  
17  
18  
19  
20  
21  
22  
23  
24  
25  
26  
27  
28  
29  
30  
31  
32  
33  
34  
35  
36  
37  
38  
39  
40  
41  
42  
43  
44  
45  
46  
47  
48  
49  
50  
51  
52  
53  
54  
55  
56  
57  
58  
59  
60

For peer review only

**Table 2 Subgroup analyses of the prevalence of PTSD in PLWH**

| Subgroup         | Number of studies       | Positive PTSD screening (Diagnosis) | Sample size (Tested) | Pooled prevalence of PTSD (95%CI) | Heterogeneity (I <sup>2</sup> ) | Between group difference |         |        |
|------------------|-------------------------|-------------------------------------|----------------------|-----------------------------------|---------------------------------|--------------------------|---------|--------|
|                  |                         |                                     |                      |                                   |                                 | $\chi^2$                 | P value |        |
| Geographic area  | High-income countries   | 22                                  | 1403                 | 6594                              | 0.29(0.25-0.34)                 | 94.60%                   | 48.93   | <0.001 |
|                  | Middle-income countries | 8                                   | 555                  | 2515                              | 0.23(0.14-0.32)                 | 97.40%                   |         |        |
|                  | Low-income countries    | 4                                   | 130                  | 1052                              | 0.21(0.03-0.39)                 | 97.90%                   |         |        |
| Population group | MSM                     | 3                                   | 129                  | 380                               | 0.33(0.29-0.38)                 | 73.70%                   | 19.80   | <0.001 |
|                  | Female                  | 12                                  | 805                  | 3212                              | 0.24(0.22-0.25)                 | 90.70%                   |         |        |
|                  | non-MSM male            | 4                                   | 165                  | 754                               | 0.20(0.17-0.23)                 | 89.10%                   |         |        |
| Sampling         | Consecutive sampling    | 7                                   | 280                  | 2387                              | 0.17(0.10-0.24)                 | 97.30%                   | 181.54  | <0.001 |
|                  | Convenient sampling     | 18                                  | 1128                 | 4404                              | 0.31(0.26-0.36)                 | 91.00%                   |         |        |

|                 |                           |    |      |      |                 |        |        |        |
|-----------------|---------------------------|----|------|------|-----------------|--------|--------|--------|
| Data collection | Self-report questionnaire | 21 | 1543 | 6230 | 0.29(0.25-0.33) | 92.50% | 175.49 | <0.001 |
|                 | Clinical interview        | 13 | 545  | 3931 | 0.22(0.16-0.27) | 97.20% |        |        |

For peer review only

1  
2  
3  
4  
5  
6  
7  
8  
9  
10  
11  
12  
13  
14  
15  
16  
17  
18  
19  
20  
21  
22  
23  
24  
25  
26  
27  
28  
29  
30  
31  
32  
33  
34  
35  
36  
37  
38  
39  
40  
41  
42  
43  
44  
45  
46

## DISCUSSION

To the best of our knowledge, this is the first meta-analysis to provide the pooled estimated rate of PTSD among PLWH. A comprehensive search of the literature assessing the rate of comorbidity between PTSD and HIV-infection was performed, and 34 studies met the predefined criteria and were included in the meta-analysis. A total of 10161 participants were involved, of which 2088 were identified with PTSD. The estimated pooled prevalence rate was 27% (95% CI: 23% to 31%), which suggests a considerable burden of PTSD in the HIV-infected population. High heterogeneity across studies was detected, and factors such as differences in region, population characteristic, sampling, and measurement were associated with prevalence rates.

As indicated, the PTSD prevalence rate among PLWH found in this study (27%) not only far exceeded that among the general population (3.9%),<sup>66</sup> but was also much higher than the prevalence of PTSD among other vulnerable groups in some previous studies. For example, the prevalence rate for cancer-related PTSD was 5.1%-15.3%,<sup>67</sup> in persons with chronic pain, the estimated mean prevalence of PTSD was 9.7%.<sup>68</sup> The pooled prevalence of PTSD among PLWH found in this study heightened the high rate of co-morbidity between HIV infection and PTSD, which is consistent with previous demonstrations.<sup>9 69</sup> For PLWH, although depressive symptoms have been the focus of many studies, and 36% of PLWH were likely to have depression according to nationally representative data in the U.S.,<sup>70</sup> this pooled estimated rate of PTSD among PLWH showed that PTSD is also a common mental disorder among individuals living with



1  
2  
3  
4  
5 HIV/AIDS. Therefore, the results of our study significantly underscore the importance  
6  
7  
8 of early assessment and trauma-directed psychological interventions for PLWH.  
9

10 Undoubtedly, heterogeneity between studies is expected in such a relatively large  
11  
12 topic of review. In this review, the estimated PTSD prevalence rates in PLWH varied  
13  
14 widely (1.6%-54.1%) across studies and countries, which is also a common problem in  
15  
16 the epidemiology of psychological and mental health disorders.<sup>71 72</sup> Consistent with the  
17  
18 findings of previous research,<sup>52</sup> the majority of studies which have determined the  
19  
20 incidence of HIV-related PTSD have been conducted in developed countries (n=22).  
21  
22 Compared with lower-income countries, higher-income countries reported relatively  
23  
24 higher rates of PTSD. This tendency and the varied prevalence of PTSD among PLWH  
25  
26 may be explained by the cross-cultural differences in attitudes towards HIV infection.  
27  
28 Turan et al.<sup>73</sup> found that the level of perceived HIV-related stigma in the community  
29  
30 experienced by PLWH may cause adverse health and psychosocial outcomes. Social  
31  
32 isolation and stigma might exacerbate symptoms of PTSD.<sup>74</sup> In high-income countries,  
33  
34 PLWH may experience “compound” or “layered” stigma, where stigmatizing beliefs not  
35  
36 only associated with HIV infection but also related to sexual orientation, commercial  
37  
38 sexual behaviors, etc.<sup>75</sup> Although, HIV-related stigma is highly burdensome in some  
39  
40 mid-income countries, such as China,<sup>76 77</sup> the reported prevalence of PLWH with PTSD  
41  
42 was lower compared to higher-income countries. The differences between collectivism  
43  
44 and individualism rooted in eastern and western culture may be an explanation.<sup>78</sup> It is  
45  
46 worth noting that social context may not only influence the susceptibility of mental  
47  
48  
49  
50  
51  
52  
53  
54  
55  
56  
57  
58  
59  
60

1  
2  
3  
4  
5 health disorders, but it also constitutes an important factor in perceived stigma among  
6  
7 individuals with mental illness. Compared to high-income countries,  
8  
9  
10 stigmatization-beliefs about the causes and presence of mental illness are still  
11  
12  
13 widespread in low- and middle-income countries,<sup>79 80</sup> which may lead to less disease  
14  
15 reporting. Caution must be applied, since there is a lack of studies investigating  
16  
17  
18 HIV-related PTSD in lower- (n=4) and middle-income (n=8) countries. In particular,  
19  
20  
21 detection of prevalence is associated with the representativeness and size of sample. In  
22  
23  
24 the context of low- and middle-income countries, it could be argued that lower HIV  
25  
26 testing rate may underestimate the PTSD prevalence and impact generalizability. Thus,  
27  
28  
29 more epidemiological studies are warranted to better understanding and clarify the  
30  
31  
32 difference in PTSD prevalence among PLWH globally.

33  
34 Subgroup analyses indicated that the prevalence of PTSD differed significantly  
35  
36 when gender and sexual orientation were taken into consideration. Specifically, MSM  
37  
38  
39 infected with HIV exhibited a higher rate of PTSD (33%) in comparison with both  
40  
41  
42 female (24%) and non-MSM male (20%) groups. As suggested by the aforementioned  
43  
44  
45 findings, one possible explanation is that HIV-infected MSM may experience higher  
46  
47  
48 levels of stigma and trauma related to their sexual orientation.<sup>30 81</sup> Compared with  
49  
50  
51 heterosexual counterparts, MSM reported higher risk for suicidal ideation,<sup>82</sup> which also  
52  
53  
54 indicates greater psychological stress and mental health problems (i.e. PTSD and  
55  
56  
57 depression). In addition, estimated PTSD prevalence in HIV-infected females was  
58  
59  
60 higher than that among non-MSM males. This matches the pattern of prevalence in

1  
2  
3  
4  
5 PTSD, in which being female is a risk factor associated with PTSD development.<sup>16</sup> The  
6  
7 findings that MSM and female HIV-infected individuals are at higher risk of developing  
8  
9 PTSD may indicate that related health promotion campaigns should be directed to these  
10  
11 groups. Clinicians should also take into consideration the PTSD susceptibility in  
12  
13 different groups of HIV-infected populations during diagnoses as well. Notably, most  
14  
15 eligible studies did not provide separate prevalence rates regarding the gender of  
16  
17 participants, and only 3 studies identified PTSD prevalence among MSM living with  
18  
19 HIV. Given that these data are from a small number of studies and/or participants, this  
20  
21 finding should be interpreted with caution. Nonetheless, given the high prevalence of  
22  
23 PTSD in this group, future efforts should be made to obtain more prevalence data on  
24  
25 PTSD among MSM.  
26  
27  
28  
29  
30  
31  
32  
33

34 In our study, we assessed methodological differences that may result in  
35  
36 heterogeneity. Factors including sampling strategies (convenience vs consecutive) and  
37  
38 measurement (self-report vs clinical interview) were evaluated by subgroup analyses.  
39  
40 Among 34 studies providing estimated prevalence of PTSD, 7 reported participants  
41  
42 were consecutively enrolled via self-referral from flyers describing the study or  
43  
44 advertisements from HIV health care providers, and generated a lower pooled  
45  
46 prevalence rate (17%) compared with the other 18 studies using convenience sampling  
47  
48 (31%), though both sampling methods were non-probabilistic. An increase in reporting  
49  
50 rate due to convenience sampling has also been found in another meta-analysis  
51  
52 synthesizing the HCV seroconversion rates in HIV-positive MSM.<sup>83</sup> Convenience  
53  
54  
55  
56  
57  
58  
59  
60

1  
2  
3  
4  
5 samples may allow researchers to select participants who are more likely to have PTSD  
6  
7 symptoms and lead to over-estimation, but given that only 4 studies were rated as high  
8  
9 quality and limited description of study methods was detected in some studies, the  
10  
11 reporting of epidemiology may not be sufficient to draw conclusions. Therefore, the  
12  
13 appropriateness of calculating pooled prevalence estimates could be questioned, and the  
14  
15 pooled prevalence estimate regarding varied recruitment approaches of the studies  
16  
17 should be interpreted with caution.  
18  
19  
20  
21  
22

23 In this review, a total of 14 different tools were used to assess PTSD symptoms  
24  
25 among PLWH across studies. Overall, the rate of PTSD screened by self-report  
26  
27 instruments (29%) was higher than that assessed by clinical interview (22%). Though  
28  
29 both measurements were in accordance with the diagnostic criteria (i.e. DSM or ICD),  
30  
31 clinical interviews most likely do a much better job of assessing symptoms carefully –  
32  
33 for example, not counting symptoms that do not meet clinically meaningful thresholds,  
34  
35 and self-report measures may inflate the prevalence estimates;<sup>84</sup> alternatively, subjects  
36  
37 may be more comfortable reporting symptoms using self-report questionnaires  
38  
39 (presumably paper or online surveys rather than face-to-face interviews). Screening or  
40  
41 diagnosing with survey instruments is a common and practical method, especially in  
42  
43 resource-limited regions. We found that, though a number of PTSD measures have been  
44  
45 used to assess PTSD among PLWH, there is no tool designed for this population  
46  
47 specifically. As the sensitivity and specificity of the measures may impact accurate  
48  
49 PTSD detection, further research is required to identify a standardized measure  
50  
51  
52  
53  
54  
55  
56  
57  
58  
59  
60

1  
2  
3  
4  
5 accordingly to improve validity.  
6

7  
8 Certain limitations should be acknowledged in this meta-analysis. First, though  
9  
10 minimal potential for publication bias was presumed as all data drawn for this review  
11  
12 were from studies reporting estimated point prevalence without intervention,  
13  
14 publication bias cannot be ruled out for there are a number of studies published in  
15  
16 languages other than English and Chinese. Second, the heterogeneity was high in the  
17  
18 whole sample and most subgroups. Considering the eligible studies included in this  
19  
20 meta-analysis were from diverse sociodemographic backgrounds, we have analysed the  
21  
22 influences of region, population group, recruitment venue, and measurement method,  
23  
24 which explained parts of the heterogeneity. Third, though some studies have indicated  
25  
26 that several sociodemographic factors such as age may be associated with PTSD  
27  
28 incidence among PLWH, we were unable to conduct subgroup analyses stratified by age  
29  
30 due to the lack of detailed information reported in the published studies. As the quality  
31  
32 of reporting could increase the susceptibility to bias, it is imperative for the researchers  
33  
34 to report their findings of observational studies in accordance with the appropriate  
35  
36 guidelines, such as the STROBE checklist.  
37  
38  
39  
40  
41  
42  
43  
44  
45

## 46 **CONCLUSIONS**

47  
48  
49 This review contributes to evidence on the quantitatively pooled prevalence of PTSD  
50  
51 among PLWH. Stratified subgroups including geographic area, population group,  
52  
53 sampling and measurement method were found to be significant factors accounting for  
54  
55 the varied prevalence of PTSD among PLWH. More effective intervention strategies  
56  
57  
58  
59  
60

1  
2  
3  
4  
5 targeting PTSD among PLWH are urgently needed. Future efforts should be made to  
6  
7 obtain countries' own PTSD prevalence data among PLWH as well as specific  
8  
9 vulnerable minorities, which will provide a basis for public health policy, health-care  
10  
11 planning, and resource allocation for PTSD intervention initiatives. Our study also  
12  
13 suggests that more research using robust and comprehensive methodology is needed to  
14  
15 provide rigorous evidence for designing the targeted psychological interventions.  
16  
17  
18  
19  
20  
21  
22

23 **Figure 1** Flow chart of study inclusion

24  
25 **Figure 2** Forest plot presenting the prevalence of PTSD in PLWH

26  
27  
28  
29  
30  
31 **Contributors:** Conception of the work: HW and CT. Systematic review and article  
32  
33 evaluation: CT, JM, XX and LZ. Data analysis: CT and XX. Results interpretation: CT,  
34  
35 LAG, HW and ABW. Drafting the article: CT, LAG, HW and ABW. Critical revision  
36  
37 of the manuscript: LAG, HW and ABW. Final approval of the manuscript: all the  
38  
39 authors. All the authors fulfill the ICMJE criteria for authorship.  
40  
41  
42  
43

44 **Acknowledgements:** The authors would like to thank the anonymous referees for  
45  
46 constructive comments.  
47

48  
49 **Funding:** This research received no specific grant from any funding body. CT is  
50  
51 supported by the Scholarship from China Scholarship Council (CSC.201806370166).  
52  
53

54 **Data sharing statement:** No additional unpublished data are available from the study.  
55

56  
57 **Competing interests:** None declared.  
58  
59  
60

**REFERENCES**

1. UNAIDS. UNAIDS Data 2018.  
<http://www.unaids.org/en/resources/documents/2018/unaids-data-2018> (Accessed 18 March 2019).
2. Niu L, Luo D, Liu Y, *et al.* The mental health of people living with HIV in China, 1998–2014: a systematic review. *PLoS One*. 2016;11:e0153489.
3. Adams C, Zacharia S, Masters L, *et al.* Mental health problems in people living with HIV: changes in the last two decades: the London experience 1990–2014. *AIDS care*. 2016;28:56–9.
4. Young C. Understanding HIV-related posttraumatic stress disorder in South Africa: a review and conceptual framework. *African Journal of AIDS Research*. 2011;10:139–48.
5. Sherr L, Nagra N, Kulubya G, *et al.* HIV infection associated post-traumatic stress disorder and post-traumatic growth—a systematic review. *Psychology, health & medicine*. 2011;16:612–29.
6. Friedman MJ, Resick PA, Bryant RA, *et al.* Considering PTSD for DSM-5. *Depression and anxiety*. 2011;28:750–69.
7. Luo S, Lin C, Ji G, *et al.* Post-traumatic Stress Disorder Symptoms Among People Living with HIV/AIDS in Rural China. *AIDS Behav*. 2017;21:3202–8.
8. Cavanaugh CE, Hansen NB, Sullivan TP. HIV sexual risk behavior among low-income women experiencing intimate partner violence: The role of

- 1  
2  
3  
4  
5 posttraumatic stress disorder. *AIDS Behav.* 2010;14:318–27.  
6  
7  
8 9. Neigh GN, Rhodes ST, Valdez A, *et al.* PTSD co-morbid with HIV: Separate but  
9  
10 equal, or two parts of a whole? *Neurobiology of disease.* 2016;92:116–23.  
11  
12  
13 10. Borwein A, Salters KA, Palmer AK, *et al.* High rates of lifetime and recent violence  
14  
15 observed among harder-to-reach women living with HIV. *AIDS care.*  
16  
17 2014;26:587–94.  
18  
19  
20 11. Kessler RC. Posttraumatic stress disorder: the burden to the individual and to  
21  
22 society. *The Journal of clinical psychiatry.* 2000;61(Suppl 5):4-14.  
23  
24  
25 12. Pence BW. The impact of mental health and traumatic life experiences on  
26  
27 antiretroviral treatment outcomes for people living with HIV/AIDS. *Journal of*  
28  
29 *Antimicrobial Chemotherapy.* 2009;63:636–40.  
30  
31  
32 13. Ebrahimzadeh Z, Goodarzi MA, Joulaei H. Predicting the Antiretroviral Medication  
33  
34 Adherence and CD4 Measure in Patients with HIV/AIDS Based on the Post  
35  
36 Traumatic Stress Disorder and Depression. *Iranian Journal of Public Health.*  
37  
38 2019;48:139–46.  
39  
40  
41 14. Julnes PS, Auh S, Krakora R, *et al.* The association between post-traumatic stress  
42  
43 disorder and markers of inflammation and immune activation in HIV-infected  
44  
45 individuals with controlled viremia. *Psychosomatics.* 2016;57:423–30.  
46  
47  
48 15. Lynn C, Chenneville T, Bradley-Klug K, *et al.* Depression, anxiety, and  
49  
50 posttraumatic stress as predictors of immune functioning: differences between youth  
51  
52 with behaviorally and perinatally acquired HIV. *AIDS care.* 2019 Mar 4:1–10.  
53  
54  
55  
56  
57  
58  
59  
60



- 1  
2  
3  
4  
5 16. Brief DJ, Bollinger AR, Vielhauer MJ, *et al.* Understanding the interface of HIV,  
6  
7  
8 trauma, post-traumatic stress disorder, and substance use and its implications for  
9  
10 health outcomes. *AIDS care.* 2004;16:97–120.  
11
- 12  
13 17. Nightingale VR, Sher TG, Mattson M, *et al.* The effects of traumatic stressors and  
14  
15 HIV-related trauma symptoms on health and health related quality of life. *AIDS*  
16  
17 *Behav.* 2011;15:1870–8.  
18
- 19  
20 18. Koegler E, Kennedy CE. A scoping review of the associations between mental  
21  
22 health and factors related to HIV acquisition and disease progression in  
23  
24 conflict-affected populations. *Confl Health.* 2018;12:20.  
25  
26
- 27  
28 19. Pearson CR, Kaysen D, Huh D, *et al.* Randomized Control Trial of Culturally  
29  
30 Adapted Cognitive Processing Therapy for PTSD Substance Misuse and HIV  
31  
32 Sexual Risk Behavior for Native American Women. *AIDS Behav.* 2019;23:695–706.  
33  
34
- 35  
36 20. Tull MT, Weiss NH, McDermott MJ. Post-traumatic stress disorder and impulsive  
37  
38 and risky behavior: Overview and discussion of potential mechanisms.  
39  
40 *Comprehensive guide to post-traumatic stress disorders.* 2016;803–16.  
41  
42
- 43  
44 21. Weiss NH, Tull MT, Borne MER, *et al.* Posttraumatic stress disorder symptom  
45  
46 severity and HIV-risk behaviors among substance-dependent inpatients. *AIDS care.*  
47  
48 2013;25:1219–26.  
49  
50
- 51  
52 22. Applebaum AJ, Bedoya CA, Hendriksen ES, *et al.* Future directions for  
53  
54 interventions targeting PTSD in HIV-infected adults. *Journal of the Association of*  
55  
56 *Nurses in AIDS Care.* 2015;26:127–38.  
57  
58  
59  
60

- 1  
2  
3  
4  
5 23. Machtinger E, Wilson T, Haberer JE, *et al.* Psychological trauma and PTSD in  
6  
7  
8 HIV-positive women: a meta-analysis. *AIDS Behav.* 2012;16:2091–100.  
9
- 10 24. Gonzalez A, Locicero B, Mahaffey B, *et al.* Internalized HIV stigma and  
11  
12  
13 mindfulness: associations with PTSD symptom severity in trauma-exposed adults  
14  
15  
16 with HIV/AIDS. *Behavior modification.* 2016;40:144–63.  
17
- 18 25. Kemppainen JK, MacKain S, Alexander M, *et al.* Posttraumatic stress disorder and  
19  
20  
21 stressful life events among rural women with HIV disease. *Journal of the*  
22  
23  
24 *Association of Nurses in AIDS Care.* 2017;28:216–25.  
25
- 26 26. Rubin LH, Cook JA, Springer G, *et al.* Perceived and post-traumatic stress are  
27  
28  
29 associated with decreased learning, memory, and fluency in HIV-infected women.  
30  
31  
32 *AIDS (London, England).* 2017;31:2393–1401.  
33
- 34 27. Seedat S. Interventions to improve psychological functioning and health outcomes  
35  
36  
37 of HIV-infected individuals with a history of trauma or PTSD. *Current HIV/AIDS*  
38  
39  
40 *Reports.* 2012;9:344–50.  
41
- 42 28. World Health Organization. The ICD-10 classification of mental and behavioural  
43  
44  
45 disorders: clinical descriptions and diagnostic guidelines. Geneva: World Health  
46  
47  
48 Organization; 1992.
- 49 29. Association AP. Diagnostic and statistical manual of mental disorders. 5th Edition.  
50  
51  
52 Washington, DC: American Psychiatric Pub; 2013.  
53
- 54 30. Sales JM, Swartzendruber A, Phillips AL. Trauma-Informed HIV Prevention and  
55  
56  
57 Treatment. *Curr HIV/AIDS Rep.* 2016;13:374–82.  
58  
59  
60

- 1  
2  
3  
4  
5 31. Burnham KE, Cruess DG, Kalichman MO, *et al.* Trauma symptoms, internalized  
6  
7 stigma, social support, and sexual risk behavior among HIV-positive gay and  
8  
9 bisexual MSM who have sought sex partners online. *AIDS care.* 2016;28:347–53.  
10  
11  
12  
13 32. Rzeszutek M, Oniszczenko W, Firląg-Burkacka E. Gender differences in  
14  
15 posttraumatic stress symptoms and social support in a sample of HIV-positive  
16  
17 individuals. *Women & health.* 2017;57:792–803.  
18  
19  
20  
21 33. Rostom A, Dubé C, Cranney A, *et al.* Appendix D. Quality Assessment Forms.  
22  
23 Agency for Healthcare Research and Quality (US); 2004  
24  
25 <https://www.ncbi.nlm.nih.gov/books/NBK35156/> (Accessed 21 October 2018).  
26  
27  
28  
29 34. Higgins JP, Thompson SG. Quantifying heterogeneity in a meta-analysis. *Statistics*  
30  
31 in medicine. 2002;21(11):1539-58.  
32  
33  
34 35. Spies G, Konkiewitz EC, Seedat S. Incidence and persistence of depression among  
35  
36 women living with and without HIV in South Africa: A longitudinal study. *AIDS*  
37  
38 *Behav.* 2018;22(10):3155–65.  
39  
40  
41  
42 36. Verhey R, Chibanda D, Gibson L, *et al.* Validation of the posttraumatic stress  
43  
44 disorder checklist - 5 (PCL-5) in a primary care population with high HIV  
45  
46 prevalence in Zimbabwe. *BMC Psychiatry.* 2018;18:109.  
47  
48  
49  
50 37. Gao M, Xiao C, Zhang X, *et al.* Social capital and PTSD among PLWHA in China:  
51  
52 the mediating role of resilience and internalized stigma. *Psychology, health &*  
53  
54 *medicine.* 2018;23:698–706.  
55  
56  
57  
58 38. McLean CP, Gay NG, Metzger DA, *et al.* Psychiatric Symptoms and Barriers to  
59  
60

- 1  
2  
3  
4  
5 Care in HIV-Infected Individuals Who Are Lost to Care. *J Int Assoc Provid AIDS*  
6  
7  
8 *Care*. 2017;16:423–9.  
9
- 10 39. Rubin LH, Pyra M, Cook JA, *et al*. Post-traumatic stress is associated with verbal  
11  
12 learning, memory, and psychomotor speed in HIV-infected and HIV-uninfected  
13  
14 women. *Journal of neurovirology*. 2016;22:159–69.  
15  
16
- 17 40. John M, Greene M, Hessel NA, *et al*. Geriatric assessments and association with  
18  
19 VACS index among HIV-infected older adults in San Francisco. *Journal of*  
20  
21 *acquired immune deficiency syndromes (1999)*. 2016;72:534.  
22  
23
- 24 41. Zhang X, Wang T, Liu M, *et al*. Post-traumatic stress disorder among people living  
25  
26 with HIV/AIDS and its influence factors. *Chongqing Medicine*. 2016;232–5.  
27  
28
- 29 42. Battaglia TA, Gunn CM, McCoy ME, *et al*. Beliefs About Anal Cancer among  
30  
31 HIV-Infected Women: Barriers and Motivators to Participation in Research.  
32  
33  
34  
35  
36 *Womens Health Issues*. 2015;25:720–6.  
37  
38
- 39 43. Hansrod F, Spies G, Seedat S. Type and severity of intimate partner violence and its  
40  
41 relationship with PTSD in HIV-infected women. *Psychology, health & medicine*.  
42  
43  
44 2015;20:697–709.  
45
- 46 44. Brownley JR, Fallot RD, Berley RW, *et al*. Trauma history in African-American  
47  
48 women living with HIV: effects on psychiatric symptom severity and religious  
49  
50 coping. *AIDS care*. 2015;27:964–71.  
51  
52
- 53 45. Malee K, Mellins CA, Huo Y, *et al*. Prevalence, incidence and persistence of  
54  
55 psychiatric and substance use disorders among mothers living with HIV. *Journal of*  
56  
57  
58  
59  
60

- 1  
2  
3  
4  
5 *acquired immune deficiency syndromes (1999)*. 2014;65:526.  
6  
7  
8 46. Glémaud M, Illa L, Echenique M, *et al*. Abuse and mental health concerns among  
9  
10 HIV-infected Haitian women living in the United States. *Journal of the Association*  
11  
12 *of Nurses in AIDS Care*. 2014;25:S62–9.  
13  
14  
15 47. Gore-Felton C, Ginzburg K, Chartier M, *et al*. Attachment style and coping in  
16  
17 relation to posttraumatic stress disorder symptoms among adults living with  
18  
19 HIV/AIDS. *Journal of behavioral medicine*. 2013;36:51–60.  
20  
21  
22  
23 48. Glover DA, Williams JK, Kisler KA. Using novel methods to examine stress among  
24  
25 HIV-positive African American men who have sex with men and women. *J Behav*  
26  
27 *Med*. 2013;36:283–94.  
28  
29  
30  
31 49. Peterson K, Togun T, Klis S, *et al*. Depression and posttraumatic stress disorder  
32  
33 among HIV-infected Gambians on antiretroviral therapy. *AIDS patient care and*  
34  
35 *STDs*. 2012;26:589–96.  
36  
37  
38  
39 50. Kinyanda E, Hoskins S, Nakku J, *et al*. Prevalence and risk factors of major  
40  
41 depressive disorder in HIV/AIDS as seen in semi-urban Entebbe district, Uganda.  
42  
43  
44 *BMC psychiatry*. 2011;11:205.  
45  
46  
47 51. Bogart LM, Wagner GJ, Galvan FH, *et al*. Perceived discrimination and mental  
48  
49 health symptoms among Black men with HIV. *Cultural Diversity and Ethnic*  
50  
51 *Minority Psychology*. 2011;17:295.  
52  
53  
54 52. Martin L, Kagee A. Lifetime and HIV-related PTSD among persons recently  
55  
56 diagnosed with HIV. *AIDS Behav*. 2011;15:125–31.  
57  
58  
59  
60

- 1  
2  
3  
4  
5 53. Reisner SL, Falb KL, Mimiaga MJ. Early life traumatic stressors and the mediating  
6  
7 role of PTSD in incident HIV infection among US men, comparisons by sexual  
8  
9 orientation and race/ethnicity: results from the NESARC, 2004–2005. *Journal of*  
10  
11 *Acquired Immune Deficiency Syndromes*. 2011;57:340–50.  
12  
13  
14  
15 54. Theuninck AC, Lake N, Gibson S. HIV-related posttraumatic stress disorder:  
16  
17 Investigating the traumatic events. *AIDS Patient care and STDS*. 2010;24:485–91.  
18  
19  
20  
21 55. Joska JA, Fincham DS, Stein DJ, *et al*. Clinical correlates of HIV-associated  
22  
23 neurocognitive disorders in South Africa. *AIDS Behav*. 2010;14:371–8.  
24  
25  
26 56. Adewuya AO, Afolabi MO, Ola BA, *et al*. Post-traumatic stress disorder (PTSD)  
27  
28 after stigma related events in HIV infected individuals in Nigeria. *Social Psychiatry*  
29  
30 *and Psychiatric Epidemiology*. 2009;44:761.  
31  
32  
33  
34 57. Spies G, Kader K, Kidd M, *et al*. Validity of the K-10 in detecting DSM-IV-defined  
35  
36 depression and anxiety disorders among HIV-infected individuals. *AIDS care*.  
37  
38 2009;21:1163–8.  
39  
40  
41 58. Fincham D, Smit J, Carey P, *et al*. The relationship between behavioural inhibition,  
42  
43 anxiety disorders, depression and CD4 counts in HIV-positive adults: a  
44  
45 cross-sectional controlled study. *AIDS care*. 2008;20:1279–83.  
46  
47  
48  
49 59. Zanjani F, Saboe K, Oslin D. Age difference in rates of mental health/substance  
50  
51 abuse and behavioral care in HIV-positive adults. *AIDS patient care and STDs*.  
52  
53 2007;21:347–55.  
54  
55  
56  
57 60. Israelski DM, Prentiss DE, Lubega S, *et al*. Psychiatric co-morbidity in vulnerable  
58  
59  
60

- 1  
2  
3  
4  
5 populations receiving primary care for HIV/AIDS. *AIDS care*. 2007;19:220–5.  
6  
7  
8 61. Boarts JM, Sledjeski EM, Bogart LM, *et al*. The differential impact of PTSD and  
9  
10 depression on HIV disease markers and adherence to HAART in people living with  
11  
12 HIV. *AIDS Behav*. 2006;10:253–61.  
13  
14  
15 62. Leserman J, Whetten K, Lowe K, *et al*. How trauma, recent stressful events, and  
16  
17 PTSD affect functional health status and health utilization in HIV-infected patients  
18  
19 in the south. *Psychosomatic medicine*. 2005;67:500–7.  
20  
21  
22  
23 63. Olley BO, Gxamza F, Seedat S, *et al*. Psychopathology and coping in recently  
24  
25 diagnosed HIV/AIDS patients—the role of gender. *South African Medical Journal*.  
26  
27 2003;93:928–31.  
28  
29  
30  
31 64. Vitiello B, Burnam MA, Bing EG, *et al*. Use of psychotropic medications among  
32  
33 HIV-infected patients in the United States. *American Journal of Psychiatry*.  
34  
35 2003;160:547–54.  
36  
37  
38  
39 65. Martinez A, Israelski D, Walker C, *et al*. Posttraumatic stress disorder in women  
40  
41 attending human immunodeficiency virus outpatient clinics. *AIDS patient care and*  
42  
43 *STDs*. 2002;16:283–91.  
44  
45  
46  
47 66. Koenen KC, Ratanatharathorn A, Ng L, *et al*. Posttraumatic stress disorder in the  
48  
49 World Mental Health Surveys. *Psychol Med*. 2017;47:2260–74.  
50  
51  
52 67. Abbey G, Thompson SBN, Hickish T, *et al*. A meta-analysis of prevalence rates and  
53  
54 moderating factors for cancer-related post-traumatic stress disorder. *Psychooncology*.  
55  
56 2015;24:371–81.  
57  
58  
59  
60

- 1  
2  
3  
4  
5 68. Siqueland J, Hussain A, Lindstrøm JC, *et al.* Prevalence of Posttraumatic Stress  
6  
7 Disorder in Persons with Chronic Pain: A Meta-analysis. *Frontiers in Psychiatry*.  
8  
9 2017;8:164.  
10  
11  
12 69. Kelly B, Raphael B, Judd F, *et al.* Posttraumatic stress disorder in response to HIV  
13  
14 infection. *General Hospital Psychiatry*. 1998;20:345–52.  
15  
16  
17 70. Bing EG, Burnam MA, Longshore D, *et al.* Psychiatric disorders and drug use  
18  
19 among human immunodeficiency virus–infected adults in the United States.  
20  
21  
22 *Archives of general psychiatry*. 2001;58:721–8.  
23  
24  
25 71. Pringsheim T, Jette N, Frolkis A, *et al.* The prevalence of Parkinson’s disease: A  
26  
27 systematic review and meta-analysis. *Movement disorders*. 2014;29:1583–90.  
28  
29  
30 72. Wang T, Fu H, Kaminga AC, *et al.* Prevalence of depression or depressive  
31  
32 symptoms among people living with HIV/AIDS in China: a systematic review and  
33  
34 meta-analysis. *BMC psychiatry*. 2018 Dec;18(1):160.  
35  
36  
37 73. Turan B, Budhwani H, Fazeli PL, *et al.* How Does Stigma Affect People Living  
38  
39 with HIV? The Mediating Roles of Internalized and Anticipated HIV Stigma in the  
40  
41 Effects of Perceived Community Stigma on Health and Psychosocial Outcomes.  
42  
43  
44 *AIDS Behav*. 2017;21:283–91.  
45  
46  
47 74. Kamen C, Vorasarun C, Canning T, *et al.* The impact of stigma and social support  
48  
49 on development of post-traumatic growth among persons living with HIV. *Journal*  
50  
51  
52  
53  
54  
55  
56  
57 75. Lowther K, Selman L, Harding R, *et al.* Experience of persistent psychological  
58  
59  
60



- 1  
2  
3  
4  
5 symptoms and perceived stigma among people with HIV on antiretroviral therapy  
6  
7 (ART): a systematic review. *International journal of nursing studies*.  
8  
9  
10 2014;51(8):1171-89.  
11  
12  
13 76. Li Z, Morano JP, Khoshnood K, *et al*. HIV-related stigma among people living with  
14  
15 HIV/AIDS in rural Central China. *BMC Health Serv Res*. 2018;18:453.  
16  
17  
18 77. Li L, Liang L-J, Lin C, *et al*. HIV prevention intervention to reduce HIV-related  
19  
20 stigma: evidence from China. *AIDS (London, England)*. 2010;24:115.  
21  
22  
23 78. Shavitt S, Cho YI, Johnson TP, *et al*. Culture Moderates the Relation Between  
24  
25 Perceived Stress, Social Support, and Mental and Physical Health. *Journal of*  
26  
27 *Cross-Cultural Psychology*. 2016;47:956–80.  
28  
29  
30  
31 79. Lauber C, Rössler W. Stigma towards people with mental illness in developing  
32  
33 countries in Asia. *International Review of Psychiatry*. 2007;19:157–78.  
34  
35  
36 80. Seeman N, Tang S, Brown AD, *et al*. World survey of mental illness stigma.  
37  
38 *Journal of Affective Disorders*. 2016;190:115–21.  
39  
40  
41 81. Reisner SL, Mimiaga MJ, Safren SA, *et al*. Stressful or traumatic life events,  
42  
43 post-traumatic stress disorder (PTSD) symptoms, and HIV sexual risk taking among  
44  
45 men who have sex with men. *AIDS care*. 2009;21:1481–9.  
46  
47  
48  
49 82. Luo Z, Feng T, Fu H, *et al*. Lifetime prevalence of suicidal ideation among men  
50  
51 who have sex with men: a meta-analysis. *BMC psychiatry*. 2017;17:406.  
52  
53  
54 83. Hagan H, Jordan AE, Neurer J, *et al*. Incidence of sexually transmitted hepatitis C  
55  
56 virus infection in HIV-positive men who have sex with men. *AIDS*.  
57  
58  
59  
60

1  
2  
3  
4  
5 2015;29:2335–45.  
6

7 84. Ayers S, Wright DB, Ford E. Hyperarousal symptoms after traumatic and  
8  
9 nontraumatic births. *Journal of Reproductive and Infant Psychology*.  
10  
11

12 2015;33:282–93.  
13  
14  
15  
16  
17  
18  
19  
20  
21  
22  
23  
24  
25  
26  
27  
28  
29  
30  
31  
32  
33  
34  
35  
36  
37  
38  
39  
40  
41  
42  
43  
44  
45  
46  
47  
48  
49  
50  
51  
52  
53  
54  
55  
56  
57  
58  
59  
60

For peer review only

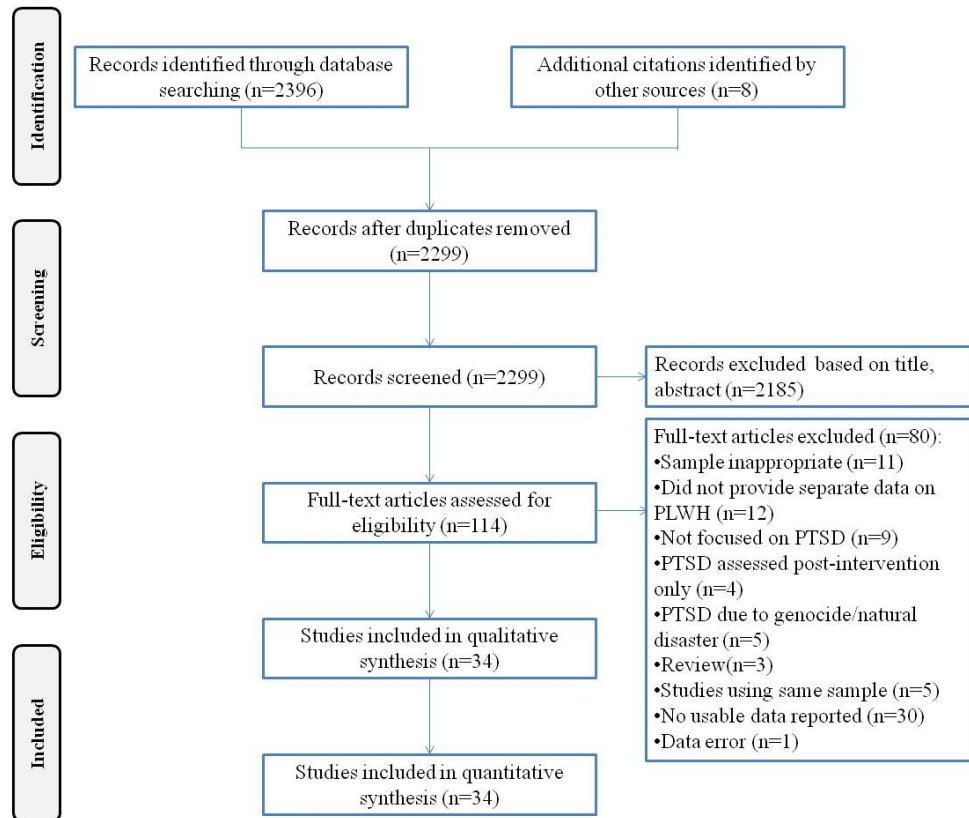

Figure 1 Flow chart of study inclusion

300x250mm (96 x 96 DPI)

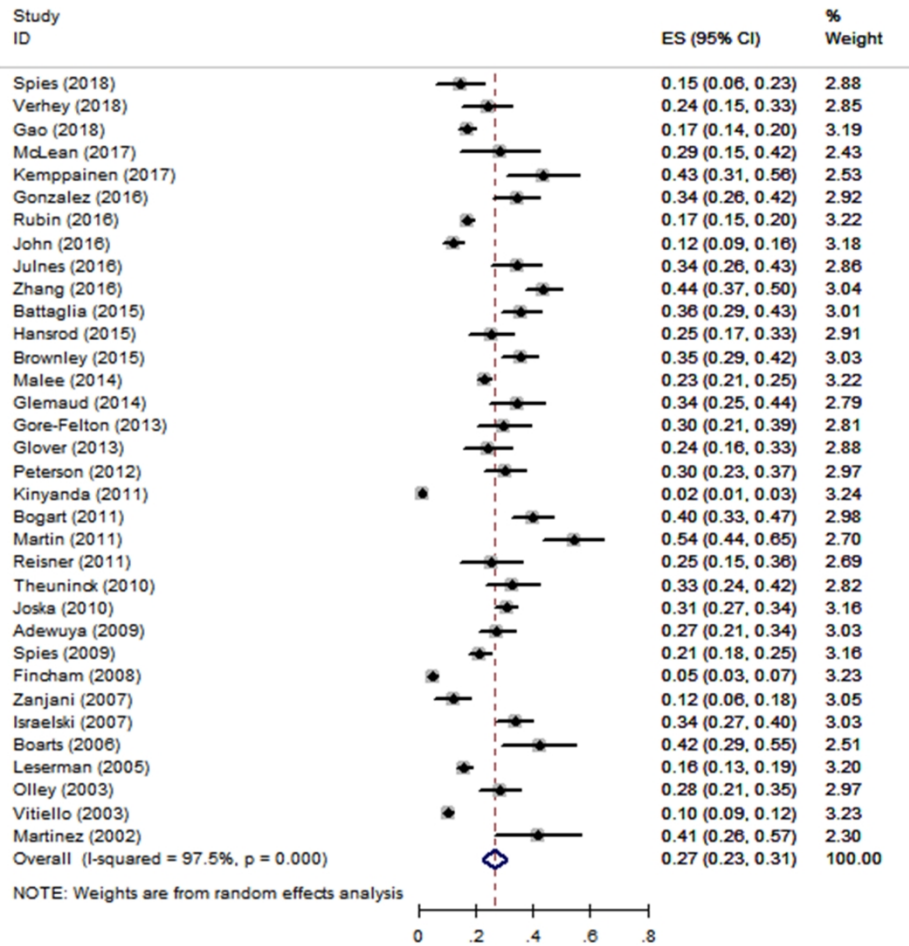

Figure 2 Forest plot presenting the prevalence of PTSD in PLWH

# MOOSE Checklist

| Items                                                                                                                                                                                                                                                           | Page #     | Comments       |
|-----------------------------------------------------------------------------------------------------------------------------------------------------------------------------------------------------------------------------------------------------------------|------------|----------------|
| <b>TITLE</b> Identify the study as a meta-analysis (or systematic review)                                                                                                                                                                                       | 3          |                |
| <b>ABSTRACT</b> Use the journal's structured format                                                                                                                                                                                                             | 3,4        |                |
| <b>INTRODUCTION</b>                                                                                                                                                                                                                                             |            |                |
| · The clinical problem                                                                                                                                                                                                                                          | 5,6        |                |
| · The hypothesis                                                                                                                                                                                                                                                | 5          |                |
| · A statement of objectives that includes the study population, the condition of interest, the exposure or intervention, and the outcome(s) considered                                                                                                          | 7          |                |
| <b>SOURCES</b>                                                                                                                                                                                                                                                  |            |                |
| · Qualifications of searchers (eg, librarians and investigators)                                                                                                                                                                                                | 8          | 1 psychiatrist |
| · Search strategy, including time period included in the synthesis and keywords                                                                                                                                                                                 | 7,8        |                |
| · Effort to include all available studies, including contact with authors                                                                                                                                                                                       | 8          |                |
| · Databases and registries searched                                                                                                                                                                                                                             | 7          |                |
| · Search software used, name and version, including special features used (eg, explosion)                                                                                                                                                                       | -          |                |
| · Use of hand searching (eg, reference lists of obtained articles)                                                                                                                                                                                              | 8          |                |
| · List of citations located and those excluded, including justification                                                                                                                                                                                         | figure 1   |                |
| · Method of addressing articles published in languages other than English                                                                                                                                                                                       | 7          |                |
| · Method of handling abstracts and unpublished studies                                                                                                                                                                                                          | -          | Not applicable |
| · Description of any contact with authors                                                                                                                                                                                                                       | -          |                |
| <b>STUDY SELECTION</b>                                                                                                                                                                                                                                          |            |                |
| · Types of study designs considered                                                                                                                                                                                                                             | 8          | Observational  |
| · Relevance or appropriateness of studies gathered for assessing the hypothesis to be tested                                                                                                                                                                    | 7,8        |                |
| · Rationale for the selection and coding of data (eg, sound clinical principles or convenience)                                                                                                                                                                 | 7,8        |                |
| · Documentation of how data were classified and coded (eg, multiple raters, blinding, etc)                                                                                                                                                                      | 8,9        |                |
| · Assessment of confounding (eg, comparability of cases and controls in studies where appropriate)                                                                                                                                                              | -          | Not applicable |
| · Assessment of study quality, including blinding of quality assessors; stratification or regression on possible predictors of study results                                                                                                                    | 9,10       |                |
| · Assessment of heterogeneity                                                                                                                                                                                                                                   | 10         |                |
| · Statistical methods (eg, complete description of fixed or random effects models, justification of whether the chosen models account for predictors of study results, dose-response models, or cumulative meta-analysis) in sufficient detail to be replicated | 10         |                |
| <b>RESULTS</b>                                                                                                                                                                                                                                                  |            |                |
| · A graph summarizing individual study estimates and the overall estimate                                                                                                                                                                                       | Figure 1,2 |                |
| · A table giving descriptive information for each included study                                                                                                                                                                                                | Tables 1   |                |
| · Results of sensitivity testing (eg, subgroup analysis)                                                                                                                                                                                                        | 17,18      |                |
| · Indication of statistical uncertainty of findings                                                                                                                                                                                                             | 17         |                |
| <b>DISCUSSION</b>                                                                                                                                                                                                                                               |            |                |
| · Strengths and weaknesses                                                                                                                                                                                                                                      | 21-26      |                |
| · Potential biases in the review process (eg, publication bias)                                                                                                                                                                                                 | 26         |                |
| · Justification for exclusion (eg, exclusion of non-English-language citations)                                                                                                                                                                                 | -          |                |
| · Assessment of quality of included studies                                                                                                                                                                                                                     | 25         |                |
| · Consideration of alternative explanations for observed results                                                                                                                                                                                                | 27         |                |
| · Generalization of the conclusions (ie, appropriate for the data presented and within the domain of the literature review)                                                                                                                                     | 26         |                |
| · Guidelines for future research                                                                                                                                                                                                                                | 26,27      |                |
| · Disclosure of funding source                                                                                                                                                                                                                                  | 27         |                |

# BMJ Open

## A global estimate of the prevalence of posttraumatic stress disorder among adults living with HIV: A systematic review and meta-analysis

|                                 |                                                                                                                                                                                                                                                                                                             |
|---------------------------------|-------------------------------------------------------------------------------------------------------------------------------------------------------------------------------------------------------------------------------------------------------------------------------------------------------------|
| Journal:                        | <i>BMJ Open</i>                                                                                                                                                                                                                                                                                             |
| Manuscript ID                   | bmjopen-2019-032435.R1                                                                                                                                                                                                                                                                                      |
| Article Type:                   | Original research                                                                                                                                                                                                                                                                                           |
| Date Submitted by the Author:   | 16-Dec-2019                                                                                                                                                                                                                                                                                                 |
| Complete List of Authors:       | TANG, chulei; Central South University Xiangya School of Nursing, Goldsamt, Lloyd; NYU College of Nursing, Meng, Jingjing; Central South University Xiao, Xueling; Central South University Zhang, Li; Central South University Williams, Ann; New York University Wang, Honghong; Central South University |
| <b>Primary Subject Heading</b>: | Global health                                                                                                                                                                                                                                                                                               |
| Secondary Subject Heading:      | Epidemiology, Mental health, HIV/AIDS                                                                                                                                                                                                                                                                       |
| Keywords:                       | Posttraumatic stress disorder, HIV/AIDS, Prevalence, Meta-analysis                                                                                                                                                                                                                                          |
|                                 |                                                                                                                                                                                                                                                                                                             |

SCHOLARONE™  
Manuscripts



I, the Submitting Author has the right to grant and does grant on behalf of all authors of the Work (as defined in the below author licence), an exclusive licence and/or a non-exclusive licence for contributions from authors who are: i) UK Crown employees; ii) where BMJ has agreed a CC-BY licence shall apply, and/or iii) in accordance with the terms applicable for US Federal Government officers or employees acting as part of their official duties; on a worldwide, perpetual, irrevocable, royalty-free basis to BMJ Publishing Group Ltd ("BMJ") its licensees and where the relevant Journal is co-owned by BMJ to the co-owners of the Journal, to publish the Work in this journal and any other BMJ products and to exploit all rights, as set out in our [licence](#).

The Submitting Author accepts and understands that any supply made under these terms is made by BMJ to the Submitting Author unless you are acting as an employee on behalf of your employer or a postgraduate student of an affiliated institution which is paying any applicable article publishing charge ("APC") for Open Access articles. Where the Submitting Author wishes to make the Work available on an Open Access basis (and intends to pay the relevant APC), the terms of reuse of such Open Access shall be governed by a Creative Commons licence – details of these licences and which [Creative Commons](#) licence will apply to this Work are set out in our licence referred to above.

Other than as permitted in any relevant BMJ Author's Self Archiving Policies, I confirm this Work has not been accepted for publication elsewhere, is not being considered for publication elsewhere and does not duplicate material already published. I confirm all authors consent to publication of this Work and authorise the granting of this licence.

**TITLE PAGE**

**Title:** A global estimate of the prevalence of posttraumatic stress disorder among adults living with HIV: A systematic review and meta-analysis

**Running head:** Posttraumatic stress disorder, HIV, Prevalence, Meta-analysis

**Authors:**

1. Chulei TANG, BSN, RN

Xiangya School of Nursing, Central South University, Changsha, China

ORCID: 0000-0003-3178-5130

2. Lloyd A Goldsamt, PhD, Senior Research Scientist

Rory Meyers College of Nursing, New York University, 433 First Avenue, New York 10013, USA

3. Jingjing MENG, BSN, RN

Xiangya School of Nursing, Central South University, Changsha, China

4. Xueling XIAO, MSN, RN

Xiangya School of Nursing, Central South University, Changsha, China

5. Li ZHANG, MSN, RN

Xiangya School of Nursing, Central South University, Changsha, China

6. Ann Bartley Williams, PhD, Professor

Rory Meyers College of Nursing, New York University, 433 First Avenue, New York 10013, USA

7. Honghong WANG, RN, MSN, PhD, Professor

Xiangya School of Nursing, Central South University, Changsha, China.



1  
2  
3  
4 **Corresponding author**  
5

6 Honghong WANG  
7

8 Xiangya School of Nursing, Central South University  
9

10 172 Tongzipo road, Changsha 410013, Hunan, China  
11

12  
13 Email: honghong\_wang@hotmail.com  
14

15 Telephone number: 0731-82650270  
16

17 Fax number: 0731-82650270  
18  
19

20  
21 **Keywords** Posttraumatic stress disorder, HIV/AIDS, Prevalence, Meta-analysis  
22

23 **Word count: 3646 words**  
24  
25  
26  
27  
28  
29  
30  
31  
32  
33  
34  
35  
36  
37  
38  
39  
40  
41  
42  
43  
44  
45  
46  
47  
48  
49  
50  
51  
52  
53  
54  
55  
56  
57  
58  
59  
60

1  
2  
3  
4  
5 **A global estimate of the prevalence of posttraumatic stress disorder among adults**  
6  
7 **living with HIV: A systematic review and meta-analysis**  
8  
9

10  
11  
12  
13 **ABSTRACT**  
14

15 **Objectives** Although people living with HIV (PLWH) have been disproportionately  
16 affected by posttraumatic stress disorder (PTSD), the global prevalence of PTSD among  
17 PLWH is unknown. This study aimed to systematically review the prevalence of PTSD  
18 among PLWH worldwide and explore variation in prevalence across sociodemographic  
19 and methodological factors.  
20  
21  
22  
23  
24  
25  
26  
27

28 **Design** A meta-analysis using a random-effect model was conducted to pool the  
29 prevalence estimated from individual studies, and subgroup analyses were used to  
30 analyze heterogeneities.  
31  
32  
33  
34  
35

36 **Setting, participants and measures** Observational studies providing PTSD prevalence  
37 data in an adult HIV population were searched from January 2000 to November 2019.  
38 Measurements were not restricted, although the definition of PTSD had to align with the  
39 Diagnostic and Statistical Manual of Mental Disorders (DSM) or the International  
40 Classification of Diseases (ICD) diagnostic criteria.  
41  
42  
43  
44  
45  
46  
47  
48

49 **Results** A total of 38 articles were included among 2406 records identified initially. The  
50 estimated global prevalence of PTSD in PLWH was 28% (95% CI 24-33%). Significant  
51 heterogeneity was detected in the proportion of PLWH who reported PTSD across  
52 studies, which was partially explained by geographic area, population group,  
53  
54  
55  
56  
57  
58  
59  
60

1  
2  
3  
4  
5 measurement and sampling method ( $p<0.05$ ).  
6

7 **Conclusion** PTSD among PLWH is common worldwide. This review highlights that  
8 PTSD should be routinely screened for and that more effective prevention strategies and  
9  
10 PTSD should be routinely screened for and that more effective prevention strategies and  
11  
12 treatment packages targeting PTSD are needed in PLWH.  
13  
14  
15  
16

### 17 **Strengths and limitations of this study**

- 18 ● This is the first meta-analysis providing comprehensive assessment on the  
19 prevalence of posttraumatic stress disorder (PTSD) among adults living with HIV.  
20  
21 ● Several subgroup analyses were conducted to examine the influence of diverse  
22 sociodemographic backgrounds as well as methodological heterogeneity.  
23  
24 ● This review was conducted with specific definitions of PTSD as part of the  
25 inclusion criteria to help in acquiring high level of evidence, which also limited the  
26 number of eligible studies.  
27  
28 ● A lack of studies carried out on the topic in low-income and middle-income  
29 countries could underestimate the burden of HIV-PTSD prevalence of the world.  
30  
31 ● We did not undertake a search of grey literature, restricting our sample to articles  
32 published in peer-reviewed journals.  
33  
34  
35  
36  
37  
38  
39  
40  
41  
42  
43  
44  
45  
46  
47  
48  
49  
50  
51  
52  
53  
54  
55  
56  
57  
58  
59  
60

## INTRODUCTION

Globally, there were more than 36 million people living with HIV (PLWH) by the end of 2017.<sup>1</sup> Although increasingly expanded access to antiretroviral therapy (ART) has led to a prolonged life span, a large portion of PLWH still suffer a significant burden due to psychiatric disorders.<sup>2,3</sup> Posttraumatic stress disorder (PTSD) is a mental health condition following exposure to a life-threatening event, or extreme or repeated exposure to traumatic events.<sup>4</sup> A growing body of literature indicates that HIV-infected people have a heightened risk for PTSD.<sup>5-6</sup> PLWH are more likely to report a history of traumatic and stressful life experiences than the general population, including childhood sexual/physical abuse and intimate partner violence.<sup>7-9</sup> PTSD may precede an HIV-positive diagnosis due to previous traumatic experiences. In addition, being diagnosed with HIV, a life-threatening illness, is a potentially traumatic event in and of itself, and PTSD may emerge as a result of this diagnosis. Infection with HIV not only causes a progressive destruction of the immune system, which increases the susceptibility to malignancies that threaten a person's life, but being labeled and associated with HIV stigma, taking multiple daily medications and experiencing repeated unpleasant side effects also constitute potentially traumatic events.<sup>10</sup> These high rates of potential trauma exposure during the course of the illness may also increase the likelihood of developing PTSD.

Generally, the concept of PTSD has been broadly applied to military veterans, survivors of disasters and accidents, and victims of violent assaults. PTSD as a serious

1  
2  
3  
4  
5 and costly health problem in the general population is well recognized, and not only  
6  
7  
8 impairs a person's physical health, but also greatly influences social functioning.<sup>11</sup> The  
9  
10  
11 co-occurrence of PTSD and HIV-infection creates even more challenges regarding both  
12  
13 the treatment of PTSD and the management of HIV. PTSD can negatively impact  
14  
15 medication adherence and impair immune functioning,<sup>12-15</sup> both of which are especially  
16  
17 critical for PLWH. HIV-infected patients with PTSD have been found to be at increased  
18  
19 risk of somatization and physical disorders.<sup>16</sup> The illness experience of PTSD, such as  
20  
21 persistent avoidance and re-experiencing the traumatic event, may also compromise  
22  
23 quality of life and cause significant distress in PLWH.<sup>7 17</sup> Subsequently, prolonged and  
24  
25 untreated PTSD may lead to exacerbation of PTSD as well as HIV progression.<sup>18</sup> There  
26  
27 is also evidence suggesting that reductions in PTSD symptom severity are related to  
28  
29 improved HIV-risk related outcomes.<sup>19</sup> Given that PTSD elevates HIV-risk behaviors<sup>20</sup>  
30  
31 and the possibility of HIV transmission also increases along with disease progression,  
32  
33  
34  
35  
36  
37  
38  
39 PLWH suffering from PTSD are an important group to understand and with whom to  
40  
41  
42  
43 intervene.

44 Valid data on PTSD prevalence rates among PLWH is essential. Evidence on the  
45  
46 extent of PTSD among PLWH is needed to raise awareness and recommend clinical  
47  
48 management. Although a number of studies have investigated the prevalence of PTSD  
49  
50 in PLWH, findings have been inconsistent.<sup>22</sup> While studies have reported varied  
51  
52 incidence, few efforts have been made to aggregate existing research using meta-  
53  
54 analysis techniques. There was one published meta-analysis estimating the pooled  
55  
56  
57  
58  
59  
60

1  
2  
3  
4  
5 prevalence of PTSD among women living with HIV in 2012.<sup>23</sup> But the lack of studies  
6  
7  
8 with other groups lowered the generalizability and global relevance of their findings.  
9  
10 Moreover, the meta-analysis was conducted in 2012, and the increase of publications  
11  
12 about PTSD among PLWH since then<sup>24-26</sup> suggests that a timely update is urgently  
13  
14  
15 needed. Indeed, several reviews provide a useful overview of the possible prevalence of  
16  
17 PTSD among PLWH;<sup>22-27</sup> however, a number of gaps remain. First, to date, there has  
18  
19  
20 been no attempt to achieve a better understanding of the epidemiology of PTSD in  
21  
22  
23 PLWH and the reviews did not aim at an overall PTSD prevalence specifically. Second,  
24  
25 economically and politically, while precise estimates of prevalence can support efficient  
26  
27 allocation of resources, factors that might influence PTSD prevalence rates, such as  
28  
29  
30 population characteristics and socio-cultural context have been neglected.  
31  
32

33  
34 Therefore, to fill these knowledge gaps, we aimed to provide an estimate for the  
35  
36 worldwide prevalence of PTSD in PLWH and to test whether PTSD prevalence in  
37  
38  
39 PLWH differs based between population groups, country income groups and study  
40  
41  
42 characteristics. This information can then be used to inform further practice and  
43  
44  
45 research for this highly co-morbid group.

## 46 **METHODS**

### 47 **Search strategy**

48  
49  
50 Systematic searches were conducted through 5 electronic English databases (Medline,  
51  
52  
53 Web of Science, CINAHL, EMBASE and Cochrane Library) and 3 Chinese databases  
54  
55  
56 (CNKI, Wanfang Database, Sinomed) to identify published studies on PTSD prevalence  
57  
58  
59  
60

1  
2  
3  
4  
5 among PLWH from January 2000 to November 2019. The search terms were:  
6  
7 posttrauma\*, post trauma\*, post-trauma\*, stress disorder\*, OR PTSD; AND HIV,  
8  
9 acquired immunodeficiency syndrome, AIDS, OR PLWH\$; AND epidemiology,  
10  
11 occurrence, incidence, OR prevalence (see online supplementary appendix 1 for the  
12  
13 precise search strategy). The reference lists of review articles and retrieved full-text  
14  
15 articles were also examined for additional papers that were eligible for this review.  
16  
17  
18  
19

### 20 21 **Eligibility criteria**

22  
23 Studies were included for this meta-analysis if they met the following predetermined  
24  
25 selection criteria: (1) published in Chinese or English in a peer reviewed journal; (2)  
26  
27 observational study where prevalence figures for PTSD were stated or can be calculated  
28  
29 in an adult HIV population; and (3) underlined that PTSD cases were identified in  
30  
31 accordance with the Diagnostic and Statistical Manual of Mental Disorders (DSM) or  
32  
33 the International Classification of Diseases (ICD) diagnostic criteria.<sup>28 29</sup> Studies were  
34  
35 excluded if (1) they only recruited those who had mental distress; (2) they specifically  
36  
37 targeted only youth under 18 or children affected by HIV. No restriction was applied  
38  
39 regarding gender, nationality, or sexual orientation. Additionally, articles were reviewed  
40  
41 closely, and if repeated data were observed, only the earlier publication with one set of  
42  
43 complete data was included.  
44  
45  
46  
47  
48  
49

### 50 51 **Data extraction and analysis**

52  
53 Screening of papers was carried out by three of the authors (C.T., J.M. and X.X.)  
54  
55 following PRISMA recommendations. C.T and X.X. searched the English papers and  
56  
57  
58  
59  
60

1  
2  
3  
4  
5 J.M. screened the Chinese language papers. After duplicates were deleted, each  
6  
7 investigator read titles and abstracts closely to capture all potential studies. Full-text  
8  
9 articles were obtained and reviewed for all criteria. Any discrepancies were resolved by  
10  
11 discussion with the research team. The PRISMA flow chart shows the results of the  
12  
13 systematic search (figure 1)  
14  
15  
16

### 17 **Data extraction**

18  
19 Two authors (C.T. and X.X.) used a data extraction sheet to capture the following data  
20  
21 independently from included papers: first author, year of publication, country of study,  
22  
23 sampling method, sample size, number of patients with PTSD, measurements and  
24  
25 outcome data. The third investigator (H.W.) helped to verify all extracted data and  
26  
27 resolve any uncertainties. To facilitate detection of sample/methodological  
28  
29 heterogeneity, countries were categorized according to their income level, and  
30  
31 measurements were classified into diagnostic questionnaire and clinical interview based  
32  
33 on the approach to diagnosing PTSD. Selection bias was examined by reviewing the  
34  
35 articles included in the meta-analysis to ensure they met eligibility criteria. Gender and  
36  
37 sexual orientation were considered because of underlying differences in the epidemics  
38  
39 of HIV and trauma.<sup>30-32</sup> Specifically, populations were grouped as women and men, and  
40  
41 samples of HIV-infected men were further classified into men who have sex with men  
42  
43 (MSM) and non-MSM males.  
44  
45  
46  
47  
48  
49  
50  
51  
52

### 53 **Assessment of methodological quality**

54  
55 We used the quality assessment forms for cross-sectional/prevalence studies  
56  
57  
58  
59  
60



1  
2  
3  
4  
5 recommended by the U.S. Agency for Healthcare Research and Quality (AHRQ)<sup>33</sup> to  
6  
7 assess the reliability of the eligible studies. The checklist included 11 items. Each item  
8  
9 was coded with a “Yes/No/Unclear”: “No” or “Unclear” was scored “0”, and “Yes” was  
10  
11 scored “1”. Consistent with previous meta-analyses studies using the AHRQ  
12  
13 assessments, a total score of 8-11, 4-7, and 0-3 indicated high, moderate and low  
14  
15 quality, respectively.  
16  
17

### 21 **Meta-analysis**

22  
23 In this study, all statistical analyses were performed using Stata 12.0 software (STATA  
24  
25 Corporation, College Station, TX)<sup>34</sup>. Heterogeneity was tested and quantified by the  
26  
27 chi-square Q statistic and the  $I^2$  statistic. The prevalence rates of PTSD among PLWH  
28  
29 were combined and reported as proportions with corresponding 95% Confidence  
30  
31 Intervals (CI). The pooled prevalence was estimated using a random-effects model  
32  
33 when heterogeneity was statistically significant ( $I^2 > 50\%$ ,  $p \leq 0.10$ ). Otherwise, a fix-  
34  
35 effects model was conducted.<sup>35</sup> As sources of heterogeneity may arise from socio-  
36  
37 demographic and methodological factors, subgroup analyses were performed by  
38  
39 dividing subgroups based on (1) economic levels of the study country, (2) gender/sexual  
40  
41 orientation, (3) sampling method and (4) assessment method for PTSD, when enough  
42  
43 data was available. Chi-square ( $\chi^2$ ) tests were further used to investigate whether there  
44  
45 were significant differences between groups. We only performed these subgroup  
46  
47 analyses when data were extractable and sufficient. Separate sensitivity analyses were  
48  
49 used for studies with low quality to examine the stability of the pooled prevalence.  
50  
51  
52  
53  
54  
55  
56  
57  
58  
59  
60

1  
2  
3  
4  
5 Publication bias was assessed using the Egger's and the Begg's tests.<sup>36-37</sup> Significance  
6  
7 level of  $p$  values  $< 0.05$  were employed for all analyses.  
8  
9

### 10 **Patient and public involvement**

11  
12 Patients and the public were not involved in this study.  
13  
14

### 15 **Ethics approval**

16  
17 As this study is a systematic review based on published studies, ethical approval is not  
18  
19 required.  
20  
21  
22

## 23 **RESULTS**

### 24 **Search results**

25  
26 A total of 2396 records were identified by the electronic bibliographic database  
27  
28 searches. Ten additional manuscripts were identified through other sources (e.g.,  
29  
30 reference lists of review papers). From an initial screen of 2301 records after duplicates  
31  
32 were removed, 2185 records were excluded on basis of title or abstract because those  
33  
34 studies were not relevant to this review ( $n=2107$ ) or were reviews/commentary ( $n= 78$ ).  
35  
36 The remaining 116 full articles were selected for the eligibility assessment. Of those, 7  
37  
38 were excluded for repeated data, 9 were excluded for targeting PLWH who received  
39  
40 psychological intervention or suffered from genocide/natural disaster, and 62 were  
41  
42 excluded for not reporting the PTSD prevalence among PLWH. Finally, a total of 38  
43  
44 studies<sup>14 24 25 38-72</sup> met inclusion criteria and were included in this meta-analysis. Search  
45  
46 results are elaborated in Figure 1.  
47  
48  
49  
50  
51  
52  
53  
54  
55  
56

### 57 **Study characteristics**

1  
2  
3  
4  
5 Most of the papers (84.3%) scored 4 or more according to the AHRQ scale indicating a  
6  
7 generally moderate to high level of data quality (online supplementary appendix 2).  
8  
9

10 Table 1 shows the characteristics of the included studies. These studies were published  
11  
12 between 2002<sup>72</sup> and 2019.<sup>38</sup> Geographically, over half (n=21, 55.3%) of the 38 included  
13  
14 studies were conducted in the USA, followed by South Africa (n=6, 15.8%), China  
15  
16 (n=3, 7.9%), the United Kingdom (n=2, 5.3%), Rwanda (n=1, 2.6%) and low-income  
17  
18 countries including Gambia (n=1, 2.6%), Nigeria (n=1, 2.6%), Uganda (n=1, 2.6%),  
19  
20 Haiti (n=1, 2.6%) and Zimbabwe (n=1, 2.6%). Twenty-five studies (65.8%) measured  
21  
22 PTSD using diagnostic self-report questionnaires, while the other 13 studies (34.2%)  
23  
24 conducted clinical interviews to diagnose PTSD. Though 8 studies (21.1%) did not  
25  
26 report their sampling methods, convenience sampling methods were adopted in most  
27  
28 studies (n=20, 52.6%), followed by consecutive sampling (n=7, 18.4%), and probability  
29  
30 sampling (n=3, 7.9%). In all, 11743 PLWH were involved (sample size varied from 41  
31  
32 to 1489), of which 2742 were identified with PTSD.  
33  
34  
35  
36  
37  
38  
39  
40  
41  
42  
43  
44  
45  
46  
47  
48  
49  
50  
51  
52  
53  
54  
55  
56  
57  
58  
59  
60

**Table 1 Characteristics of the included studies**

| First author             | Year of publication | Location of study | Sampling methods     | Sample size* | No. of patients with PTSD | Measurements | Data Collection           | Quality  |
|--------------------------|---------------------|-------------------|----------------------|--------------|---------------------------|--------------|---------------------------|----------|
| Fabian <sup>38</sup>     | 2019                | USA               | convenience sampling | 238          | 80                        | PCL-C        | self-report questionnaire | moderate |
| Cheng <sup>39</sup>      | 2018                | China             | unclear              | 535          | 142                       | PCL-C        | self-report questionnaire | moderate |
| Spies <sup>40</sup>      | 2018                | South Africa      | convenience sampling | 68           | 10                        | DTS          | self-report questionnaire | moderate |
| Verhey <sup>41</sup>     | 2018                | Zimbabwe          | random sampling      | 91           | 22                        | CAPS         | clinical interview        | moderate |
| Gao <sup>42</sup>        | 2018                | China             | convenience sampling | 520          | 89                        | PCL-C        | self-report questionnaire | moderate |
| McLean <sup>43</sup>     | 2017                | USA               | convenience sampling | 42           | 12                        | PSS          | clinical interview        | moderate |
| Kemppainen <sup>25</sup> | 2017                | USA               | convenience sampling | 60           | 26                        | PCL-C        | self-report questionnaire | low      |
| Gonzalez <sup>24</sup>   | 2016                | USA               | convenience sampling | 137          | 47                        | PDS          | self-report questionnaire | moderate |
| Rubin <sup>44</sup>      | 2016                | USA               | convenience sampling | 1004         | 174                       | PCL-C        | self-report questionnaire | moderate |

1  
2  
3  
4  
5  
6  
7  
8  
9  
10  
11  
12  
13  
14  
15  
16  
17  
18  
19  
20  
21  
22  
23  
24  
25  
26  
27  
28  
29  
30  
31  
32  
33  
34  
35  
36  
37  
38  
39  
40  
41  
42  
43  
44  
45  
46

|                           |      |              |                      |      |     |                 |                           |          |
|---------------------------|------|--------------|----------------------|------|-----|-----------------|---------------------------|----------|
| John <sup>45</sup>        | 2016 | USA          | consecutive sampling | 359  | 44  | Breslau         | self-report questionnaire | moderate |
| Julnes <sup>14</sup>      | 2016 | USA          | convenience sampling | 114  | 39  | CDQ             | self-report questionnaire | moderate |
| Zhang <sup>46</sup>       | 2016 | China        | convenience sampling | 243  | 106 | PCL-C           | self-report questionnaire | low      |
| Battaglia <sup>47</sup>   | 2015 | USA          | convenience sampling | 200  | 72  | PTSD checklist  | self-report questionnaire | moderate |
| Hansrod <sup>48</sup>     | 2015 | South Africa | convenience sampling | 114  | 29  | MINI            | clinical interview        | moderate |
| Brownley <sup>49</sup>    | 2015 | USA          | unclear              | 220  | 78  | PSS             | self-report questionnaire | moderate |
| Malee <sup>50</sup>       | 2014 | USA          | convenience sampling | 1223 | 281 | CDQ             | self-report questionnaire | high     |
| Glémaud <sup>51</sup>     | 2014 | USA          | unclear              | 96   | 33  | PRIME MD<br>PHQ | clinical interview        | low      |
| Gore-Felton <sup>52</sup> | 2013 | USA          | convenience sampling | 94   | 28  | PCL-C           | self-report questionnaire | low      |
| Glover <sup>53</sup>      | 2013 | USA          | convenience sampling | 99   | 24  | PDS             | self-report questionnaire | high     |
| Dévioux <sup>54</sup>     | 2013 | Haiti        | convenience sampling | 104  | 52  | PCL-C           | self-report questionnaire | moderate |

|    |                         |      |              |                      |     |     |            |                           |          |
|----|-------------------------|------|--------------|----------------------|-----|-----|------------|---------------------------|----------|
| 1  |                         |      |              |                      |     |     |            |                           |          |
| 2  |                         |      |              |                      |     |     |            |                           |          |
| 3  |                         |      |              |                      |     |     |            |                           |          |
| 4  |                         |      |              |                      |     |     |            |                           |          |
| 5  | Gard <sup>55</sup>      | 2013 | Rwanda       | unclear              | 705 | 380 | HTS        | self-report questionnaire | moderate |
| 6  |                         |      |              |                      |     |     |            |                           |          |
| 7  |                         |      |              |                      |     |     |            |                           |          |
| 8  | Peterson <sup>56</sup>  | 2012 | Gambia       | consecutive sampling | 153 | 46  | IES-R      | self-report questionnaire | high     |
| 9  |                         |      |              |                      |     |     |            |                           |          |
| 10 |                         |      |              |                      |     |     |            |                           |          |
| 11 | Kinyanda <sup>57</sup>  | 2011 | Uganda       | consecutive sampling | 618 | 10  | MINI       | clinical interview        | moderate |
| 12 |                         |      |              |                      |     |     |            |                           |          |
| 13 |                         |      |              |                      |     |     |            |                           |          |
| 14 |                         |      |              |                      |     |     |            |                           |          |
| 15 | Bogart <sup>58</sup>    | 2011 | USA          | convenience sampling | 181 | 72  | PDS        | self-report questionnaire | moderate |
| 16 |                         |      |              |                      |     |     |            |                           |          |
| 17 |                         |      |              |                      |     |     |            |                           |          |
| 18 | Martin <sup>59</sup>    | 2011 | UK           | convenience sampling | 85  | 46  | CIDI       | clinical interview        | moderate |
| 19 |                         |      |              |                      |     |     |            |                           |          |
| 20 |                         |      |              |                      |     |     |            |                           |          |
| 21 | Reisner <sup>60</sup>   | 2011 | USA          | convenience sampling | 63  | 16  | AUDADIS-IV | clinical interview        | moderate |
| 22 |                         |      |              |                      |     |     |            |                           |          |
| 23 |                         |      |              |                      |     |     |            |                           |          |
| 24 | Theuninck <sup>61</sup> | 2010 | UK           | convenience sampling | 100 | 33  | PCL-C      | self-report questionnaire | low      |
| 25 |                         |      |              |                      |     |     |            |                           |          |
| 26 |                         |      |              |                      |     |     |            |                           |          |
| 27 |                         |      |              |                      |     |     |            |                           |          |
| 28 | Joska <sup>62</sup>     | 2010 | South Africa | unclear              | 536 | 164 | HTS        | self-report questionnaire | moderate |
| 29 |                         |      |              |                      |     |     |            |                           |          |
| 30 |                         |      |              |                      |     |     |            |                           |          |
| 31 | Adewuya <sup>63</sup>   | 2009 | Nigeria      | unclear              | 190 | 52  | MINI       | clinical interview        | moderate |
| 32 |                         |      |              |                      |     |     |            |                           |          |
| 33 |                         |      |              |                      |     |     |            |                           |          |
| 34 | Spies <sup>64</sup>     | 2009 | South Africa | unclear              | 429 | 92  | MINI       | clinical interview        | moderate |
| 35 |                         |      |              |                      |     |     |            |                           |          |
| 36 |                         |      |              |                      |     |     |            |                           |          |
| 37 | Fincham <sup>65</sup>   | 2008 | South Africa | consecutive sampling | 456 | 23  | MINI       | clinical interview        | moderate |
| 38 |                         |      |              |                      |     |     |            |                           |          |
| 39 |                         |      |              |                      |     |     |            |                           |          |
| 40 |                         |      |              |                      |     |     |            |                           |          |
| 41 |                         |      |              |                      |     |     |            |                           |          |
| 42 |                         |      |              |                      |     |     |            |                           |          |
| 43 |                         |      |              |                      |     |     |            |                           |          |
| 44 |                         |      |              |                      |     |     |            |                           |          |
| 45 |                         |      |              |                      |     |     |            |                           |          |
| 46 |                         |      |              |                      |     |     |            |                           |          |

|                         |      |              |                      |      |     |                |                           |          |
|-------------------------|------|--------------|----------------------|------|-----|----------------|---------------------------|----------|
| Zanjani <sup>66</sup>   | 2007 | USA          | random sampling      | 109  | 13  | MINI           | clinical interview        | moderate |
| Israelski <sup>67</sup> | 2007 | USA          | unclear              | 210  | 71  | PCL-C          | self-report questionnaire | low      |
| Boarts <sup>68</sup>    | 2006 | USA          | convenience sampling | 57   | 24  | PDS            | self-report questionnaire | moderate |
| Leserman <sup>69</sup>  | 2005 | USA          | consecutive sampling | 611  | 98  | PTSD checklist | self-report questionnaire | high     |
| Olley <sup>70</sup>     | 2003 | South Africa | consecutive sampling | 149  | 42  | MINI           | clinical interview        | moderate |
| Vitiello <sup>71</sup>  | 2003 | USA          | probability sample   | 1489 | 155 | CIDI           | clinical interview        | moderate |
| Martinez <sup>72</sup>  | 2002 | USA          | consecutive sampling | 41   | 17  | PCL-C          | self-report questionnaire | moderate |

---

\* Total number of adults living with HIV

*PCL-C* Posttraumatic Stress Disorder Checklist-Civilian Version; *DTS* Davidson Trauma Scale; *CAPS* Clinician Administered Post-traumatic Stress Scale; *CDQ* Client Diagnostic Questionnaire; *PDS* Posttraumatic Stress Diagnostic Scale – Self-report version; *PSS* Posttraumatic Stress Symptom Scale; *PRIME MD PHQ* Primary Care Evaluation of Mental Disorders Patient Health Questionnaire; *AUDADIS-IV* The Alcohol Use Disorder and Associated Disabilities Interview Schedule-IV; *MINI* Mini-International Neuropsychiatric

1  
2  
3  
4  
5 Interview; *IES-R* Impact of Event Scale-Revised; *HTS* the Harvard trauma scale; *DIS-IV* Diagnostic Interview Schedule for DSM-IV  
6  
7  
8 diagnoses; *PTSD checklist* Posttraumatic Stress Disorder Checklist; *CIDI* Clinical Interview for Diagnosis for DSM-IV  
9  
10  
11  
12  
13  
14  
15  
16  
17  
18  
19  
20  
21  
22  
23  
24  
25  
26  
27  
28  
29  
30  
31  
32  
33  
34  
35  
36  
37  
38  
39  
40  
41  
42  
43  
44  
45  
46

For peer review only



## Prevalence of PTSD in PLWH

The reported prevalence of PTSD in PLWH ranged from 1.6%<sup>57</sup> to 54.1%<sup>59</sup>. The overall pooled prevalence was 28% (95%CI: 24% to 33%), estimated by a random effects model, as significant heterogeneity ( $p \leq 0.001$ ,  $I^2=98.1\%$ ) was observed among the included studies. Meta-analyses are shown as forest plots (Fig. 2).

## Publication bias and sensitivity analysis

Possible publication bias was indicated according to the results of Egger's linear test ( $t=6.84$ ,  $p < 0.05$ ) and Begg's rank test ( $z=0.58$ ,  $p=0.56$ ). However, low sensitivity was suggested with the pooled prevalence of PTSD changed slightly from 28% (95%CI: 24% to 33%) to 27% (95%CI: 22% to 32%) after excluding low-quality articles.

## Subgroup Analyses

The results of subgroup analyses are shown in Table 2. The prevalence of PTSD in PLWH differed significantly by geographic area, population group, sampling and measurement method. Specifically, the proportion of PLWH with PTSD in high-income countries tended to be higher (pooled rate= 29%, 95%CI 25% to 34%) than middle-income countries (pooled rate= 27%, 95%CI 16% to 37%) and low-income countries (pooled rate= 26%, 95%CI 7% to 45%). Studies using clinical interviews reported lower prevalence rates of PTSD (pooled rate= 22%, 95%CI 16% to 27%) compared with those using self-report questionnaires (pooled rate= 31%, 95%CI 27% to 36%). The pooled PTSD prevalence among women living with HIV, MSM living with HIV and non-MSM men living with HIV were 35% (95%CI: 28% to 43%), 33% (95%CI: 29% to 38%) and

1  
2  
3  
4  
5 20% (95%CI: 17% to 23%), respectively. Also, studies conducted with convenience  
6  
7 sampling were more likely to have higher PTSD prevalence (pooled rate= 32%, 95%CI  
8  
9 27% to 37%) than those using consecutive sampling (pooled rate= 17%, 95%CI 10% to  
10  
11 24%).  
12  
13  
14  
15  
16  
17  
18  
19  
20  
21  
22  
23  
24  
25  
26  
27  
28  
29  
30  
31  
32  
33  
34  
35  
36  
37  
38  
39  
40  
41  
42  
43  
44  
45  
46  
47  
48  
49  
50  
51  
52  
53  
54  
55  
56  
57  
58  
59  
60

For peer review only

**Table 2 Subgroup analyses of the prevalence of PTSD in PLWH**

| Subgroup         | Number of studies            | Positive PTSD screening (Diagnosis) | Sample size (Tested) | Pooled prevalence of PTSD (95%CI) | Heterogeneity (I <sup>2</sup> ) | Between group difference |         |        |
|------------------|------------------------------|-------------------------------------|----------------------|-----------------------------------|---------------------------------|--------------------------|---------|--------|
|                  |                              |                                     |                      |                                   |                                 | $\chi^2$                 | P value |        |
| Geographic area  | High-income countries        | 23                                  | 1483                 | 6832                              | 0.29(0.25-0.34)                 | 94.70%                   | 107.32  | <0.001 |
|                  | Middle-income countries      | 10                                  | 1077                 | 3755                              | 0.27(0.16-0.37)                 | 98.60%                   |         |        |
|                  | Low-income countries         | 5                                   | 182                  | 1156                              | 0.26(0.07-0.45)                 | 98.30%                   |         |        |
| Population group | Women living with HIV        | 15                                  | 1282                 | 4190                              | 0.35(0.28-0.43)                 | 96.10%                   | 26.99   | <0.001 |
|                  | MSM living with HIV          | 3                                   | 129                  | 380                               | 0.33(0.29-0.38)                 | 73.70%                   |         |        |
|                  | non-MSM male living with HIV | 4                                   | 165                  | 754                               | 0.20(0.17-0.23)                 | 89.10%                   |         |        |
| Sampling         | Consecutive sampling         | 7                                   | 280                  | 2387                              | 0.17(0.10-0.24)                 | 97.30%                   | 206.01  | <0.001 |
|                  | Convenience sampling         | 20                                  | 1260                 | 4746                              | 0.32(0.27-0.37)                 | 91.60%                   |         |        |

|    |                 |                           |    |      |      |                 |        |        |        |
|----|-----------------|---------------------------|----|------|------|-----------------|--------|--------|--------|
| 1  |                 |                           |    |      |      |                 |        |        |        |
| 2  |                 |                           |    |      |      |                 |        |        |        |
| 3  |                 |                           |    |      |      |                 |        |        |        |
| 4  |                 |                           |    |      |      |                 |        |        |        |
| 5  | Data collection | Self-report questionnaire | 25 | 2197 | 7812 | 0.31(0.27-0.36) | 95.70% | 297.01 | <0.001 |
| 6  |                 |                           |    |      |      |                 |        |        |        |
| 7  |                 |                           |    |      |      |                 |        |        |        |
| 8  |                 | Clinical interview        | 13 | 545  | 3931 | 0.22(0.16-0.27) | 97.20% |        |        |
| 9  |                 |                           |    |      |      |                 |        |        |        |
| 10 | <hr/>           |                           |    |      |      |                 |        |        |        |
| 11 |                 |                           |    |      |      |                 |        |        |        |
| 12 |                 |                           |    |      |      |                 |        |        |        |
| 13 |                 |                           |    |      |      |                 |        |        |        |
| 14 |                 |                           |    |      |      |                 |        |        |        |
| 15 |                 |                           |    |      |      |                 |        |        |        |
| 16 |                 |                           |    |      |      |                 |        |        |        |
| 17 |                 |                           |    |      |      |                 |        |        |        |
| 18 |                 |                           |    |      |      |                 |        |        |        |
| 19 |                 |                           |    |      |      |                 |        |        |        |
| 20 |                 |                           |    |      |      |                 |        |        |        |
| 21 |                 |                           |    |      |      |                 |        |        |        |
| 22 |                 |                           |    |      |      |                 |        |        |        |
| 23 |                 |                           |    |      |      |                 |        |        |        |
| 24 |                 |                           |    |      |      |                 |        |        |        |
| 25 |                 |                           |    |      |      |                 |        |        |        |
| 26 |                 |                           |    |      |      |                 |        |        |        |
| 27 |                 |                           |    |      |      |                 |        |        |        |
| 28 |                 |                           |    |      |      |                 |        |        |        |
| 29 |                 |                           |    |      |      |                 |        |        |        |
| 30 |                 |                           |    |      |      |                 |        |        |        |
| 31 |                 |                           |    |      |      |                 |        |        |        |
| 32 |                 |                           |    |      |      |                 |        |        |        |
| 33 |                 |                           |    |      |      |                 |        |        |        |
| 34 |                 |                           |    |      |      |                 |        |        |        |
| 35 |                 |                           |    |      |      |                 |        |        |        |
| 36 |                 |                           |    |      |      |                 |        |        |        |
| 37 |                 |                           |    |      |      |                 |        |        |        |
| 38 |                 |                           |    |      |      |                 |        |        |        |
| 39 |                 |                           |    |      |      |                 |        |        |        |
| 40 |                 |                           |    |      |      |                 |        |        |        |
| 41 |                 |                           |    |      |      |                 |        |        |        |
| 42 |                 |                           |    |      |      |                 |        |        |        |
| 43 |                 |                           |    |      |      |                 |        |        |        |
| 44 |                 |                           |    |      |      |                 |        |        |        |
| 45 |                 |                           |    |      |      |                 |        |        |        |
| 46 |                 |                           |    |      |      |                 |        |        |        |

For peer review only

## DISCUSSION

To the best of our knowledge, this is the first meta-analysis to provide the pooled estimated prevalence of PTSD among PLWH. A comprehensive search of the literature assessing the rate of comorbidity between PTSD and HIV-infection was performed, and 38 studies met the predefined criteria and were included in the meta-analysis. A total of 11743 participants were involved, of which 2742 were identified with PTSD. The estimated pooled prevalence rate was 28% (95% CI: 24% to 33%), which suggests a considerable burden of PTSD in the HIV-infected population. High heterogeneity across studies was detected, and factors such as differences in region, population characteristics, sampling, and measurement were associated with prevalence rates.

As indicated, the PTSD prevalence rate among PLWH found in this study (28%) not only far exceeded that among the general population (3.9%),<sup>73</sup> but was also much higher than the prevalence of PTSD among other vulnerable groups in some previous studies. For example, the prevalence rate for cancer-related PTSD was 5.1%-15.3%;<sup>74</sup> in persons with chronic pain, the estimated mean prevalence of PTSD was 9.7%.<sup>75</sup> The pooled prevalence of PTSD among PLWH found in this study heightened the high rate of co-morbidity between HIV infection and PTSD, which is consistent with previous demonstrations.<sup>8 76</sup> For PLWH, although depressive symptoms have been the focus of many studies, and 36% of PLWH were likely to have depression according to nationally representative data in the U.S.,<sup>77</sup> this pooled estimated prevalence of PTSD among PLWH showed that PTSD is also a common mental disorder among individuals living

1  
2  
3  
4  
5 with HIV/AIDS. Therefore, the results of our study significantly underscore the  
6  
7 importance of early assessment and trauma-directed psychological interventions for  
8  
9  
10 PLWH.  
11

12  
13 Undoubtedly, heterogeneity between studies is expected in such a relatively large  
14  
15 topic of review. In this review, the estimated PTSD prevalence rates in PLWH varied  
16  
17 widely (1.6%-54.1%) across studies and countries, which is also a common problem in  
18  
19 the epidemiology of psychological and mental health disorders.<sup>78 79</sup> Consistent with the  
20  
21 findings of previous research,<sup>59</sup> the majority of studies which have determined the  
22  
23 incidence of HIV-related PTSD have been conducted in developed countries (n=23).  
24  
25 Compared with lower-income countries, higher-income countries reported relatively  
26  
27 higher prevalence of PTSD. This tendency and the varied prevalence of PTSD among  
28  
29 PLWH may be explained by the cross-cultural differences in attitudes towards HIV  
30  
31 infection. Turan et al.<sup>80</sup> found that the level of perceived HIV-related stigma in the  
32  
33 community experienced by PLWH may cause adverse health and psychosocial  
34  
35 outcomes. Social isolation and stigma might exacerbate symptoms of PTSD.<sup>81</sup> In high-  
36  
37 income countries, PLWH may experience “compound” or “layered” stigma, where  
38  
39 stigmatizing beliefs are not only associated with HIV infection but also related to sexual  
40  
41 orientation, commercial sexual behaviors, etc.<sup>82</sup> Although, HIV-related stigma is highly  
42  
43 burdensome in some mid-income countries, such as China,<sup>83 84</sup> the reported prevalence  
44  
45 of PLWH with PTSD was lower compared to higher-income countries. The differences  
46  
47 between collectivism and individualism rooted in eastern and western culture may be an  
48  
49  
50  
51  
52  
53  
54  
55  
56  
57  
58  
59  
60

1  
2  
3  
4  
5 explanation.<sup>85</sup> It is worth noting that social context may not only influence the  
6  
7  
8 susceptibility of mental health disorders, but also constitutes an important factor in  
9  
10 perceived stigma among individuals with mental illness. Compared to high-income  
11  
12 countries, stigmatizing beliefs about the causes and presence of mental illness are still  
13  
14 widespread in low- and middle-income countries,<sup>86 87</sup> which may lead to less disease  
15  
16 reporting. Caution must be applied, since there is a lack of studies investigating HIV-  
17  
18 related PTSD in lower- (n=5) and middle-income (n=10) countries. In particular,  
19  
20 detection of prevalence is associated with the representativeness and size of sample. In  
21  
22 the context of low- and middle-income countries, it could be argued that lower HIV  
23  
24 testing rates may underestimate the PTSD prevalence and impact generalizability. Thus,  
25  
26 more epidemiological studies are warranted to better understand and clarify the  
27  
28 difference in PTSD prevalence among PLWH globally.  
29  
30  
31  
32  
33  
34  
35

36 Subgroup analyses indicated that the prevalence of PTSD differed significantly  
37  
38 when gender and sexual orientation were taken into consideration. Specifically, women  
39  
40 living with HIV exhibited a higher prevalence of PTSD (35%) in comparison with both  
41  
42 MSM (33%) and non-MSM male (20%) groups. This matches the pattern of prevalence  
43  
44 in PTSD, in which being female is a risk factor associated with PTSD development.<sup>16</sup>  
45  
46  
47 As suggested by the aforementioned findings, HIV-infected MSM may experience  
48  
49 higher levels of stigma and trauma related to their sexual orientation.<sup>30 88</sup> Compared  
50  
51 with heterosexual counterparts, MSM reported higher risk for suicidal ideation,<sup>89</sup> which  
52  
53 also indicates greater psychological stress and mental health problems (i.e. PTSD and  
54  
55  
56  
57  
58  
59  
60

1  
2  
3  
4  
5 depression). The findings that MSM and female HIV-infected individuals are at higher  
6  
7 risk of developing PTSD may indicate that related health promotion campaigns should  
8  
9 be directed to these groups. Clinicians should also take into consideration the PTSD  
10  
11 susceptibility in different groups of HIV-infected populations during diagnoses.  
12  
13

14  
15 Notably, most eligible studies did not provide separate prevalence rates regarding the  
16  
17 gender of participants, and only 3 studies identified PTSD prevalence among MSM  
18  
19 living with HIV. Given that these data are from a small number of studies and/or  
20  
21 participants, this finding should be interpreted with caution. Nonetheless, given the high  
22  
23 prevalence of PTSD in this group, future efforts should be made to obtain more  
24  
25 prevalence data on PTSD among MSM living with HIV.  
26  
27  
28  
29

30  
31 In our study, we assessed methodological differences that may result in  
32  
33 heterogeneity. Factors including sampling strategies (convenience vs consecutive) and  
34  
35 measurement (self-report vs clinical interview) were evaluated by subgroup analyses.  
36  
37 Among 38 studies providing estimated prevalence of PTSD, 7 reported participants  
38  
39 were consecutively enrolled via self-referral from flyers describing the study or  
40  
41 advertisements from HIV health care providers, and generated a lower pooled  
42  
43 prevalence rate (17%) compared with the other 20 studies using convenience sampling  
44  
45 (32%), though both sampling methods were non-probabilistic. An increase in reporting  
46  
47 rate due to convenience sampling has also been found in another meta-analysis  
48  
49 synthesizing the HCV seroconversion rates in HIV-positive MSM.<sup>90</sup> Convenience  
50  
51 samples may allow researchers to select participants who are more likely to have PTSD  
52  
53  
54  
55  
56  
57  
58  
59  
60



1  
2  
3  
4  
5 symptoms and lead to over-estimation, but given that only 4 studies were rated as high  
6  
7 quality and limited description of study methods was detected in some studies, the  
8  
9 reporting of epidemiology may not be sufficient to draw conclusions. Therefore, the  
10  
11 appropriateness of calculating pooled prevalence estimates could be questioned, and the  
12  
13 pooled prevalence estimate regarding the varied recruitment approaches of the studies  
14  
15 should be interpreted with caution.  
16  
17  
18  
19

20  
21 In this review, a total of 14 different tools were used to assess PTSD symptoms  
22  
23 among PLWH across studies. Overall, the prevalence rate of PTSD screened by self-  
24  
25 report instruments (31%) was higher than that assessed by clinical interview (22%).  
26  
27 Though both measurements were in accordance with the diagnostic criteria (i.e. DSM or  
28  
29 ICD), clinical interviews most likely do a much better job of assessing symptoms  
30  
31 carefully – for example, not counting symptoms that do not meet clinically meaningful  
32  
33 thresholds, and self-report measures may inflate the prevalence estimates;<sup>91</sup>  
34  
35 alternatively, subjects may be more comfortable reporting symptoms using self-report  
36  
37 questionnaires (presumably paper or online surveys rather than face-to-face interviews).  
38  
39 Screening or diagnosing with survey instruments is a common and practical method,  
40  
41 especially in resource-limited regions. We found that, though a number of measures  
42  
43 have been used to assess PTSD among PLWH, there is no tool designed for this  
44  
45 population specifically. As the sensitivity and specificity of the measures may impact  
46  
47 accurate PTSD detection, further research is required to identify a standardized measure  
48  
49 accordingly to improve validity.  
50  
51  
52  
53  
54  
55  
56  
57  
58  
59  
60

1  
2  
3  
4  
5 Certain limitations should be acknowledged in this meta-analysis. First, though  
6  
7 minimal potential for publication bias was presumed as all data drawn for this review  
8  
9 were from studies reporting estimated point prevalence without intervention,  
10  
11 publication bias cannot be ruled out for there are a number of studies published in  
12  
13 languages other than English and Chinese. Second, the heterogeneity was high in the  
14  
15 whole sample and most subgroups. Heterogeneity importantly influences the reliability  
16  
17 and accuracy of a meta-analysis, and only careful selection of appropriate studies is the  
18  
19 reliable method for acquiring correct inferences.<sup>92</sup> Even though strict eligibility criteria  
20  
21 were employed in addressing HIV-PTSD prevalence in this study, it should be noted  
22  
23 that getting HIV is only one possible traumatic event. This review suggests the need to  
24  
25 consider traumatic experiences for further studies assessing PTSD among PLWH. In  
26  
27 addition, we have analysed the influences of region, population group, recruitment  
28  
29 venue, and measurement method, which explained some of the heterogeneity. However,  
30  
31 the results should be interpreted with caution. Third, though some studies have  
32  
33 indicated that several sociodemographic factors such as age may be associated with  
34  
35 PTSD incidence among PLWH, we were unable to conduct subgroup analyses stratified  
36  
37 by age due to the lack of detailed information reported in the published studies. As the  
38  
39 quality of reporting could increase the susceptibility to bias, it is imperative for  
40  
41 researchers to report their findings of observational studies in accordance with the  
42  
43 appropriate guidelines, such as the STROBE checklist.  
44  
45  
46  
47  
48  
49  
50  
51  
52  
53  
54  
55

## 56 CONCLUSIONS

57  
58  
59  
60

1  
2  
3  
4  
5 This review contributes to evidence on the quantitatively pooled prevalence of PTSD  
6  
7 among PLWH. Stratified subgroups including geographic area, population group,  
8  
9 sampling and measurement method were found to be significant factors accounting for  
10  
11 the varied prevalence of PTSD among PLWH. More effective intervention strategies  
12  
13 targeting PTSD among PLWH are urgently needed. Future efforts should be made to  
14  
15 obtain countries' own PTSD prevalence data among PLWH as well as specific  
16  
17 vulnerable minorities, which will provide a basis for public health policy, health-care  
18  
19 planning, and resource allocation for PTSD intervention initiatives. Our study also  
20  
21 suggests that more research using robust and comprehensive methodology is needed to  
22  
23 provide rigorous evidence for designing the targeted psychological interventions.  
24  
25  
26  
27  
28  
29  
30  
31  
32  
33

34 **Figure 1** Flow chart of study inclusion

35  
36 **Figure 2** Forest plot presenting the prevalence of PTSD in PLWH  
37  
38  
39  
40

41 **Contributors:** Conception of the work: HW and CT. Systematic review and article  
42  
43 evaluation: CT, JM, XX and LZ. Data analysis: CT and XX. Results interpretation: CT,  
44  
45 LAG, HW and ABW. Drafting the article: CT, LAG, HW and ABW. Critical revision  
46  
47 of the manuscript: LAG, HW and ABW. Final approval of the manuscript: all the  
48  
49 authors. All the authors fulfill the ICMJE criteria for authorship.  
50  
51  
52

53  
54 **Acknowledgements:** The authors would like to thank Dr. TIAN Hongping, Rory  
55  
56 Meyers College of Nursing, New York University-for assistance in this systematic  
57  
58  
59  
60

1  
2  
3  
4  
5 review.

6  
7 **Funding:** This research received no specific grant from any funding body. CT is  
8 supported by the Scholarship from China Scholarship Council (CSC.201806370166).  
9

10  
11  
12 **Data sharing statement:** No additional unpublished data are available from the study.

13  
14  
15 **Competing interests:** None declared.  
16

## 17 18 19 20 21 REFERENCES

- 22  
23 1. UNAIDS. UNAIDS Data 2018.  
24 <http://www.unaids.org/en/resources/documents/2018/unaids-data-2018> (Accessed  
25 18 March 2019).  
26  
27  
28  
29  
30 2. Niu L, Luo D, Liu Y, *et al.* The mental health of people living with HIV in China,  
31 1998–2014: a systematic review. *PLoS One*. 2016;11:e0153489.  
32  
33  
34 3. Adams C, Zacharia S, Masters L, *et al.* Mental health problems in people living with  
35 HIV: changes in the last two decades: the London experience 1990–2014. *AIDS*  
36 *care*. 2016;28:56–9.  
37  
38  
39 4. Friedman MJ, Resick PA, Bryant RA, *et al.* Considering PTSD for DSM-5.  
40 *Depression and anxiety*. 2011;28:750–69.  
41  
42  
43 5. Young C. Understanding HIV-related posttraumatic stress disorder in South Africa:  
44 a review and conceptual framework. *African Journal of AIDS Research*.  
45 2011;10:139–48.  
46  
47  
48 6. Sherr L, Nagra N, Kulubya G, *et al.* HIV infection associated post-traumatic stress  
49  
50  
51  
52  
53  
54  
55  
56  
57  
58  
59  
60

- 1  
2  
3  
4  
5 disorder and post-traumatic growth—a systematic review. *Psychology, health &*  
6  
7  
8 *medicine*. 2011;16:612–29.
- 9  
10 7. Cavanaugh CE, Hansen NB, Sullivan TP. HIV sexual risk behavior among low-  
11  
12  
13 income women experiencing intimate partner violence: The role of posttraumatic  
14  
15  
16 stress disorder. *AIDS Behav*. 2010;14:318–27.
- 17  
18 8. Neigh GN, Rhodes ST, Valdez A, *et al*. PTSD co-morbid with HIV: Separate but  
19  
20  
21 equal, or two parts of a whole? *Neurobiology of disease*. 2016;92:116–23.
- 22  
23 9. Borwein A, Salters KA, Palmer AK, *et al*. High rates of lifetime and recent violence  
24  
25  
26 observed among harder-to-reach women living with HIV. *AIDS care*. 2014;26:587–  
27  
28  
29 94.
- 30  
31 10. Luo S, Lin C, Ji G, *et al*. Post-traumatic Stress Disorder Symptoms Among People  
32  
33  
34 Living with HIV/AIDS in Rural China. *AIDS Behav*. 2017;21:3202–8.
- 35  
36 11. Kessler RC. Posttraumatic stress disorder: the burden to the individual and to  
37  
38  
39 society. *The Journal of clinical psychiatry*. 2000;61(Suppl 5):4-14.
- 40  
41 12. Pence BW. The impact of mental health and traumatic life experiences on  
42  
43  
44 antiretroviral treatment outcomes for people living with HIV/AIDS. *Journal of*  
45  
46  
47 *Antimicrobial Chemotherapy*. 2009;63:636–40.
- 48  
49 13. Ebrahimzadeh Z, Goodarzi MA, Joulaei H. Predicting the Antiretroviral Medication  
50  
51  
52 Adherence and CD4 Measure in Patients with HIV/AIDS Based on the Post  
53  
54  
55 Traumatic Stress Disorder and Depression. *Iranian Journal of Public Health*.  
56  
57  
58 2019;48:139–46.  
59  
60

- 1  
2  
3  
4  
5 14. Julnes PS, Auh S, Krakora R, *et al.* The association between post-traumatic stress  
6  
7 disorder and markers of inflammation and immune activation in HIV-infected  
8  
9 individuals with controlled viremia. *Psychosomatics*. 2016;57:423–30.  
10  
11  
12  
13 15. Lynn C, Chenneville T, Bradley-Klug K, *et al.* Depression, anxiety, and  
14  
15 posttraumatic stress as predictors of immune functioning: differences between youth  
16  
17 with behaviorally and perinatally acquired HIV. *AIDS care*. 2019 Mar 4:1–10.  
18  
19  
20  
21 16. Brief DJ, Bollinger AR, Vielhauer MJ, *et al.* Understanding the interface of HIV,  
22  
23 trauma, post-traumatic stress disorder, and substance use and its implications for  
24  
25 health outcomes. *AIDS care*. 2004;16:97–120.  
26  
27  
28  
29 17. Nightingale VR, Sher TG, Mattson M, *et al.* The effects of traumatic stressors and  
30  
31 HIV-related trauma symptoms on health and health related quality of life. *AIDS*  
32  
33 *Behav*. 2011;15:1870–8.  
34  
35  
36  
37 18. Koegler E, Kennedy CE. A scoping review of the associations between mental  
38  
39 health and factors related to HIV acquisition and disease progression in conflict-  
40  
41 affected populations. *Confl Health*. 2018;12:20.  
42  
43  
44  
45 19. Pearson CR, Kaysen D, Huh D, *et al.* Randomized Control Trial of Culturally  
46  
47 Adapted Cognitive Processing Therapy for PTSD Substance Misuse and HIV  
48  
49 Sexual Risk Behavior for Native American Women. *AIDS Behav*. 2019;23:695–706.  
50  
51  
52  
53 20. Tull MT, Weiss NH, McDermott MJ. Post-traumatic stress disorder and impulsive  
54  
55 and risky behavior: Overview and discussion of potential mechanisms.  
56  
57 *Comprehensive guide to post-traumatic stress disorders*. 2016;803–16.  
58  
59  
60

- 1  
2  
3  
4  
5 21. Weiss NH, Tull MT, Borne MER, *et al.* Posttraumatic stress disorder symptom  
6  
7 severity and HIV-risk behaviors among substance-dependent inpatients. *AIDS care.*  
8  
9 2013;25:1219–26.  
10  
11
- 12  
13 22. Applebaum AJ, Bedoya CA, Hendriksen ES, *et al.* Future directions for  
14  
15 interventions targeting PTSD in HIV-infected adults. *Journal of the Association of*  
16  
17 *Nurses in AIDS Care.* 2015;26:127–38.  
18  
19
- 20  
21 23. Machtinger E, Wilson T, Haberer JE, *et al.* Psychological trauma and PTSD in HIV-  
22  
23 positive women: a meta-analysis. *AIDS Behav.* 2012;16:2091–100.  
24  
25
- 26  
27 24. Gonzalez A, Locicero B, Mahaffey B, *et al.* Internalized HIV stigma and  
28  
29 mindfulness: associations with PTSD symptom severity in trauma-exposed adults  
30  
31 with HIV/AIDS. *Behavior modification.* 2016;40:144–63.  
32  
33
- 34  
35 25. Kempainen JK, MacKain S, Alexander M, *et al.* Posttraumatic stress disorder and  
36  
37 stressful life events among rural women with HIV disease. *Journal of the*  
38  
39 *Association of Nurses in AIDS Care.* 2017;28:216–25.  
40  
41
- 42  
43 26. Rubin LH, Cook JA, Springer G, *et al.* Perceived and post-traumatic stress are  
44  
45 associated with decreased learning, memory, and fluency in HIV-infected women.  
46  
47 *AIDS (London, England).* 2017;31:2393–1401.  
48  
49
- 50  
51 27. Seedat S. Interventions to improve psychological functioning and health outcomes  
52  
53 of HIV-infected individuals with a history of trauma or PTSD. *Current HIV/AIDS*  
54  
55 *Reports.* 2012;9:344–50.  
56  
57
- 58  
59 28. World Health Organization. The ICD-10 classification of mental and behavioural  
60

- 1  
2  
3  
4  
5 disorders: clinical descriptions and diagnostic guidelines. Geneva: World Health  
6  
7 Organization; 1992.  
8  
9
- 10 29. Association AP. Diagnostic and statistical manual of mental disorders. 5th Edition.  
11  
12 Washington, DC: American Psychiatric Pub; 2013.  
13  
14
- 15 30. Sales JM, Swartzendruber A, Phillips AL. Trauma-Informed HIV Prevention and  
16  
17 Treatment. *Curr HIV/AIDS Rep*. 2016;13:374–82.  
18  
19
- 20 31. Burnham KE, Cruess DG, Kalichman MO, *et al*. Trauma symptoms, internalized  
21  
22 stigma, social support, and sexual risk behavior among HIV-positive gay and  
23  
24 bisexual MSM who have sought sex partners online. *AIDS care*. 2016;28:347–53.  
25  
26
- 27 32. Rzeszutek M, Oniszczenko W, Firląg-Burkacka E. Gender differences in  
28  
29 posttraumatic stress symptoms and social support in a sample of HIV-positive  
30  
31 individuals. *Women & health*. 2017;57:792–803.  
32  
33
- 34 33. Rostom A, Dubé C, Cranney A, *et al*. Appendix D. Quality Assessment Forms.  
35  
36 Agency for Healthcare Research and Quality (US); 2004  
37  
38 <https://www.ncbi.nlm.nih.gov/books/NBK35156/> (Accessed 21 October 2018).  
39  
40  
41  
42  
43
- 44 34. Stata C, Station C. TX. Stata Press 2016  
45
- 46 35. Higgins JP, Thompson SG. Quantifying heterogeneity in a meta-analysis. *Statistics*  
47  
48 in medicine. 2002;21(11):1539-58.  
49  
50
- 51 36. Egger M, Smith GD, Schneider M, *et al*. Bias in meta-analysis  
52  
53 detected by a simple, graphical test. *BMJ*. 1997; 315: 629–34.  
54  
55
- 56 37. Begg CB, Mazumdar M. Operating characteristics of a rank correlation test for  
57  
58  
59  
60



- 1  
2  
3  
4  
5 publication bias. *Biometrics*. 1994; 50: 1088–101.  
6  
7  
8 38. Fabian KE, Huh D, Kemp CG, *et al*. Moderating Factors in an Anti-stigma  
9  
10 Intervention for African American Women with HIV in the United States: A  
11  
12 Secondary Analysis of the UNITY Trial. *AIDS and Behavior*. 2019;19:1-11.  
13  
14  
15 39. Chen CD, Yan H, Li SY, *et al*. Post-traumatic stress disorder and it associated  
16  
17 factors among people living with HIV in Wuhan city. *Chin J Public Health*. 2018;1-  
18  
19 4.  
20  
21  
22  
23 40. Spies G, Konkiewitz EC, Seedat S. Incidence and persistence of depression among  
24  
25 women living with and without HIV in South Africa: A longitudinal study. *AIDS*  
26  
27 *Behav*. 2018;22(10):3155–65.  
28  
29  
30  
31 41. Verhey R, Chibanda D, Gibson L, *et al*. Validation of the posttraumatic stress  
32  
33 disorder checklist - 5 (PCL-5) in a primary care population with high HIV  
34  
35 prevalence in Zimbabwe. *BMC Psychiatry*. 2018;18:109.  
36  
37  
38  
39 42. Gao M, Xiao C, Zhang X, *et al*. Social capital and PTSD among PLWHA in China:  
40  
41 the mediating role of resilience and internalized stigma. *Psychology, health &*  
42  
43 *medicine*. 2018;23:698–706.  
44  
45  
46  
47 43. McLean CP, Gay NG, Metzger DA, *et al*. Psychiatric Symptoms and Barriers to  
48  
49 Care in HIV-Infected Individuals Who Are Lost to Care. *J Int Assoc Provid AIDS*  
50  
51 *Care*. 2017;16:423–9.  
52  
53  
54  
55 44. Rubin LH, Pyra M, Cook JA, *et al*. Post-traumatic stress is associated with verbal  
56  
57 learning, memory, and psychomotor speed in HIV-infected and HIV-uninfected  
58  
59  
60

- women. *Journal of neurovirology*. 2016;22:159–69.
45. John M, Greene M, Hessel NA, *et al*. Geriatric assessments and association with VACS index among HIV-infected older adults in San Francisco. *Journal of acquired immune deficiency syndromes (1999)*. 2016;72:534.
46. Zhang X, Wang T, Liu M, *et al*. Post-traumatic stress disorder among people living with HIV/AIDS and its influence factors. *Chongqing Medicine*. 2016;232–5.
47. Battaglia TA, Gunn CM, McCoy ME, *et al*. Beliefs About Anal Cancer among HIV-Infected Women: Barriers and Motivators to Participation in Research. *Womens Health Issues*. 2015;25:720–6.
48. Hansrod F, Spies G, Seedat S. Type and severity of intimate partner violence and its relationship with PTSD in HIV-infected women. *Psychology, health & medicine*. 2015;20:697–709.
49. Brownley JR, Fallot RD, Berley RW, *et al*. Trauma history in African-American women living with HIV: effects on psychiatric symptom severity and religious coping. *AIDS care*. 2015;27:964–71.
50. Malee K, Mellins CA, Huo Y, *et al*. Prevalence, incidence and persistence of psychiatric and substance use disorders among mothers living with HIV. *Journal of acquired immune deficiency syndromes (1999)*. 2014;65:526.
51. Glémaud M, Illa L, Echenique M, *et al*. Abuse and mental health concerns among HIV-infected Haitian women living in the United States. *Journal of the Association of Nurses in AIDS Care*. 2014;25:S62–9.

- 1  
2  
3  
4  
5 52. Gore-Felton C, Ginzburg K, Chartier M, *et al.* Attachment style and coping in  
6  
7 relation to posttraumatic stress disorder symptoms among adults living with  
8  
9 HIV/AIDS. *Journal of behavioral medicine.* 2013;36:51–60.  
10  
11  
12  
13 53. Glover DA, Williams JK, Kisler KA. Using novel methods to examine stress among  
14  
15 HIV-positive African American men who have sex with men and women. *J Behav*  
16  
17 *Med.* 2013;36:283–94.  
18  
19  
20  
21 54. Dévieux JG, Malow RM, Attonito JM, *et al.* Post-traumatic stress disorder  
22  
23 symptomatology and alcohol use among HIV-seropositive adults in Haiti. *AIDS*  
24  
25 *care.* 2013;25(10):1210-8.  
26  
27  
28  
29 55. Gard TL, Hoover DR, Shi Q, *et al.* The impact of HIV status, HIV disease  
30  
31 progression, and post-traumatic stress symptoms on the health-related quality of life  
32  
33 of Rwandan women genocide survivors. *Quality of Life Research.* 2013;22(8):2073-  
34  
35 84.  
36  
37  
38  
39 56. Peterson K, Togun T, Klis S, *et al.* Depression and posttraumatic stress disorder  
40  
41 among HIV-infected Gambians on antiretroviral therapy. *AIDS patient care and*  
42  
43 *STDs.* 2012;26:589–96.  
44  
45  
46  
47 57. Kinyanda E, Hoskins S, Nakku J, *et al.* Prevalence and risk factors of major  
48  
49 depressive disorder in HIV/AIDS as seen in semi-urban Entebbe district, Uganda.  
50  
51 *BMC psychiatry.* 2011;11:205.  
52  
53  
54  
55 58. Bogart LM, Wagner GJ, Galvan FH, *et al.* Perceived discrimination and mental  
56  
57 health symptoms among Black men with HIV. *Cultural Diversity and Ethnic*  
58  
59  
60

- 1  
2  
3  
4  
5 *Minority Psychology*. 2011;17:295.  
6  
7  
8 59. Martin L, Kagee A. Lifetime and HIV-related PTSD among persons recently  
9  
10 diagnosed with HIV. *AIDS Behav*. 2011;15:125–31.  
11  
12  
13 60. Reisner SL, Falb KL, Mimiaga MJ. Early life traumatic stressors and the mediating  
14  
15 role of PTSD in incident HIV infection among US men, comparisons by sexual  
16  
17 orientation and race/ethnicity: results from the NESARC, 2004–2005. *Journal of*  
18  
19 *Acquired Immune Deficiency Syndromes*. 2011;57:340–50.  
20  
21  
22  
23 61. Theuninck AC, Lake N, Gibson S. HIV-related posttraumatic stress disorder:  
24  
25 Investigating the traumatic events. *AIDS Patient care and STDS*. 2010;24:485–91.  
26  
27  
28 62. Joska JA, Fincham DS, Stein DJ, *et al*. Clinical correlates of HIV-associated  
29  
30 neurocognitive disorders in South Africa. *AIDS Behav*. 2010;14:371–8.  
31  
32  
33  
34 63. Adewuya AO, Afolabi MO, Ola BA, *et al*. Post-traumatic stress disorder (PTSD)  
35  
36 after stigma related events in HIV infected individuals in Nigeria. *Social Psychiatry*  
37  
38 *and Psychiatric Epidemiology*. 2009;44:761.  
39  
40  
41  
42 64. Spies G, Kader K, Kidd M, *et al*. Validity of the K-10 in detecting DSM-IV-defined  
43  
44 depression and anxiety disorders among HIV-infected individuals. *AIDS care*.  
45  
46 2009;21:1163–8.  
47  
48  
49 65. Fincham D, Smit J, Carey P, *et al*. The relationship between behavioural inhibition,  
50  
51 anxiety disorders, depression and CD4 counts in HIV-positive adults: a cross-  
52  
53 sectional controlled study. *AIDS care*. 2008;20:1279–83.  
54  
55  
56  
57 66. Zanjani F, Saboe K, Oslin D. Age difference in rates of mental health/substance  
58  
59  
60

- 1  
2  
3  
4  
5 abuse and behavioral care in HIV-positive adults. *AIDS patient care and STDs*.  
6  
7 2007;21:347–55.  
8  
9
- 10 67. Israelski DM, Prentiss DE, Lubega S, *et al*. Psychiatric co-morbidity in vulnerable  
11  
12 populations receiving primary care for HIV/AIDS. *AIDS care*. 2007;19:220–5.  
13  
14
- 15 68. Boarts JM, Sledjeski EM, Bogart LM, *et al*. The differential impact of PTSD and  
16  
17 depression on HIV disease markers and adherence to HAART in people living with  
18  
19 HIV. *AIDS Behav*. 2006;10:253–61.  
20  
21  
22
- 23 69. Leserman J, Whetten K, Lowe K, *et al*. How trauma, recent stressful events, and  
24  
25 PTSD affect functional health status and health utilization in HIV-infected patients  
26  
27 in the south. *Psychosomatic medicine*. 2005;67:500–7.  
28  
29  
30
- 31 70. Olley BO, Gxamza F, Seedat S, *et al*. Psychopathology and coping in recently  
32  
33 diagnosed HIV/AIDS patients-the role of gender. *South African Medical Journal*.  
34  
35 2003;93:928–31.  
36  
37  
38
- 39 71. Vitiello B, Burnam MA, Bing EG, *et al*. Use of psychotropic medications among  
40  
41 HIV-infected patients in the United States. *American Journal of Psychiatry*.  
42  
43 2003;160:547–54.  
44  
45  
46
- 47 72. Martinez A, Israelski D, Walker C, *et al*. Posttraumatic stress disorder in women  
48  
49 attending human immunodeficiency virus outpatient clinics. *AIDS patient care and*  
50  
51 *STDs*. 2002;16:283–91.  
52  
53
- 54 73. Koenen KC, Ratanatharathorn A, Ng L, *et al*. Posttraumatic stress disorder in the  
55  
56 World Mental Health Surveys. *Psychol Med*. 2017;47:2260–74.  
57  
58  
59  
60

- 1  
2  
3  
4  
5 74. Abbey G, Thompson SBN, Hickish T, *et al.* A meta-analysis of prevalence rates and  
6  
7 moderating factors for cancer-related post-traumatic stress disorder.  
8  
9  
10 *Psychooncology*. 2015;24:371–81.  
11  
12  
13 75. Siqveland J, Hussain A, Lindstrøm JC, *et al.* Prevalence of Posttraumatic Stress  
14  
15 Disorder in Persons with Chronic Pain: A Meta-analysis. *Frontiers in Psychiatry*.  
16  
17 2017;8:164.  
18  
19  
20 76. Kelly B, Raphael B, Judd F, *et al.* Posttraumatic stress disorder in response to HIV  
21  
22 infection. *General Hospital Psychiatry*. 1998;20:345–52.  
23  
24  
25 77. Bing EG, Burnam MA, Longshore D, *et al.* Psychiatric disorders and drug use  
26  
27 among human immunodeficiency virus–infected adults in the United States.  
28  
29  
30 *Archives of general psychiatry*. 2001;58:721–8.  
31  
32  
33 78. Pringsheim T, Jette N, Frolkis A, *et al.* The prevalence of Parkinson’s disease: A  
34  
35 systematic review and meta-analysis. *Movement disorders*. 2014;29:1583–90.  
36  
37  
38 79. Wang T, Fu H, Kaminga AC, *et al.* Prevalence of depression or depressive  
39  
40 symptoms among people living with HIV/AIDS in China: a systematic review and  
41  
42 meta-analysis. *BMC psychiatry*. 2018 Dec;18(1):160.  
43  
44  
45  
46 80. Turan B, Budhwani H, Fazeli PL, *et al.* How Does Stigma Affect People Living  
47  
48 with HIV? The Mediating Roles of Internalized and Anticipated HIV Stigma in the  
49  
50 Effects of Perceived Community Stigma on Health and Psychosocial Outcomes.  
51  
52  
53 *AIDS Behav*. 2017;21:283–91.  
54  
55  
56 81. Kamen C, Vorasarun C, Canning T, *et al.* The impact of stigma and social support  
57  
58  
59  
60

- 1  
2  
3  
4  
5 on development of post-traumatic growth among persons living with HIV. *Journal*  
6  
7  
8 *of clinical psychology in medical settings*. 2016;23:126–34.  
9
- 10 82. Lowther K, Selman L, Harding R, *et al*. Experience of persistent psychological  
11  
12 symptoms and perceived stigma among people with HIV on antiretroviral therapy  
13  
14 (ART): a systematic review. *International journal of nursing studies*.  
15  
16 2014;51(8):1171-89.  
17
- 18 83. Li Z, Morano JP, Khoshnood K, *et al*. HIV-related stigma among people living with  
19  
20 HIV/AIDS in rural Central China. *BMC Health Serv Res*. 2018;18:453.  
21  
22
- 23 84. Li L, Liang L-J, Lin C, *et al*. HIV prevention intervention to reduce HIV-related  
24  
25 stigma: evidence from China. *AIDS (London, England)*. 2010;24:115.  
26  
27
- 28 85. Shavitt S, Cho YI, Johnson TP, *et al*. Culture Moderates the Relation Between  
29  
30 Perceived Stress, Social Support, and Mental and Physical Health. *Journal of Cross-*  
31  
32  
33  
34  
35  
36  
37  
38  
39  
40  
41  
42  
43  
44  
45  
46  
47  
48  
49  
50  
51  
52  
53  
54  
55  
56  
57  
58  
59  
60
86. Lauber C, Rössler W. Stigma towards people with mental illness in developing  
countries in Asia. *International Review of Psychiatry*. 2007;19:157–78.
87. Seeman N, Tang S, Brown AD, *et al*. World survey of mental illness stigma.  
*Journal of Affective Disorders*. 2016;190:115–21.
88. Reisner SL, Mimiaga MJ, Safren SA, *et al*. Stressful or traumatic life events, post-  
traumatic stress disorder (PTSD) symptoms, and HIV sexual risk taking among men  
who have sex with men. *AIDS care*. 2009;21:1481–9.
89. Luo Z, Feng T, Fu H, *et al*. Lifetime prevalence of suicidal ideation among men

1  
2  
3  
4  
5 who have sex with men: a meta-analysis. *BMC psychiatry*. 2017;17:406.  
6  
7

8 90. Hagan H, Jordan AE, Neurer J, *et al*. Incidence of sexually transmitted hepatitis C  
9  
10 virus infection in HIV-positive men who have sex with men. *AIDS*. 2015;29:2335–  
11  
12 45.  
13  
14

15 91. Ayers S, Wright DB, Ford E. Hyperarousal symptoms after traumatic and  
16  
17 nontraumatic births. *Journal of Reproductive and Infant Psychology*. 2015;33:282–  
18  
19 93.  
20  
21  
22

23 92. Melsen WG, Bootsma MC, Rovers MM, *et al*. The effects of clinical and statistical  
24  
25 heterogeneity on the predictive values of results from meta-analyses. *Clinical*  
26  
27 *Microbiology and Infection*. 2014;20(2):123-9.  
28  
29  
30  
31  
32  
33  
34  
35  
36  
37  
38  
39  
40  
41  
42  
43  
44  
45  
46  
47  
48  
49  
50  
51  
52  
53  
54  
55  
56  
57  
58  
59  
60



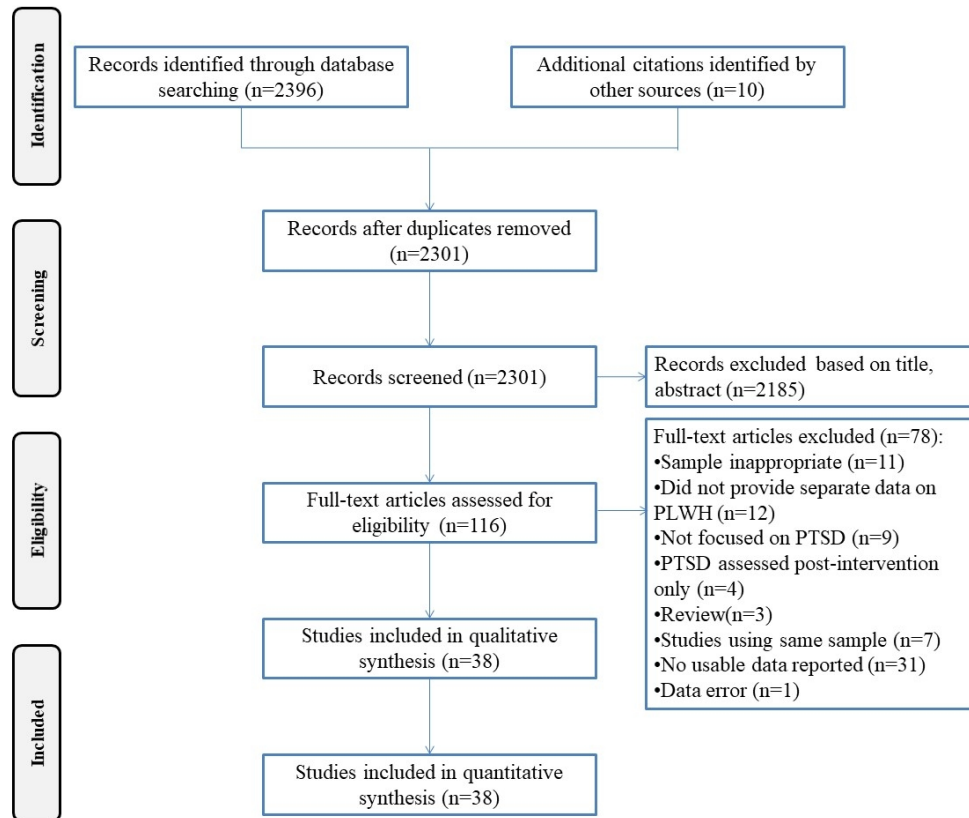

Figure 1 Flow chart of study inclusion

300x250mm (96 x 96 DPI)

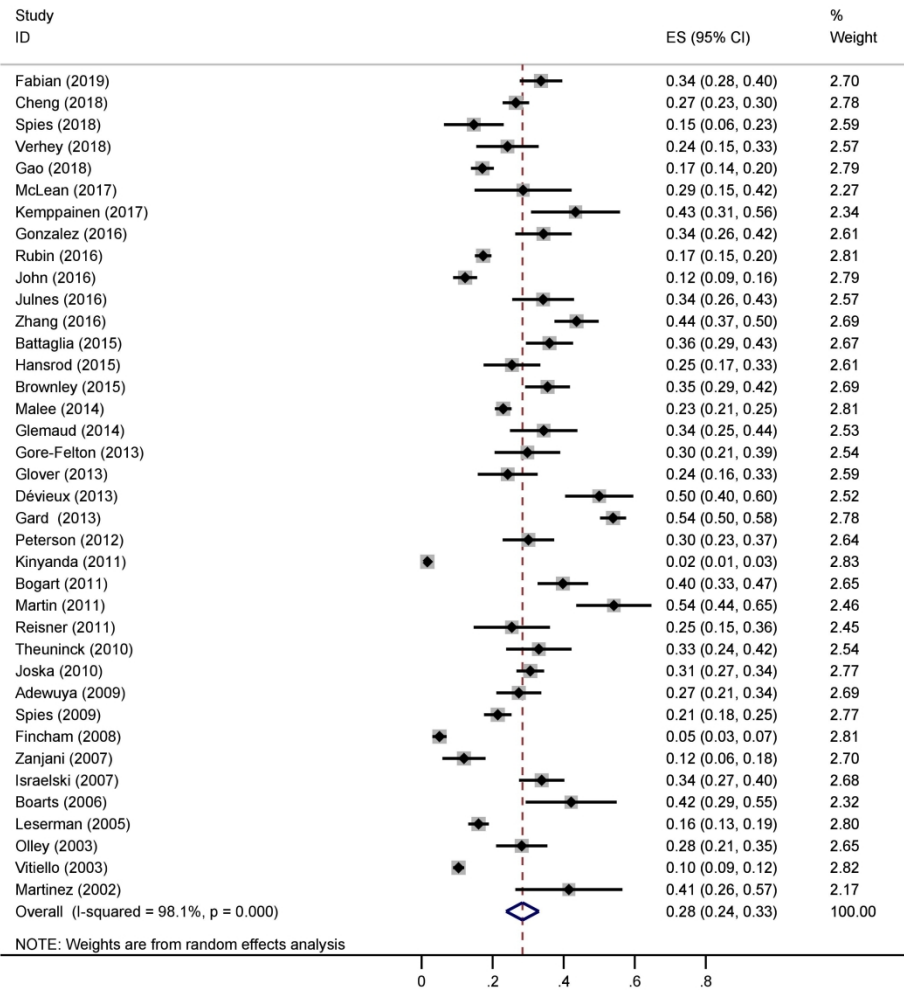

Figure 2 Forest plot presenting the prevalence of PTSD in PLWH

281x304mm (300 x 300 DPI)

## Appendix 1 – Search strategy

| ID     | Search terms                                                                                                                                                                                                                                                                                                                                                                                                                                                                                                                                                                                                                    |
|--------|---------------------------------------------------------------------------------------------------------------------------------------------------------------------------------------------------------------------------------------------------------------------------------------------------------------------------------------------------------------------------------------------------------------------------------------------------------------------------------------------------------------------------------------------------------------------------------------------------------------------------------|
| PubMed |                                                                                                                                                                                                                                                                                                                                                                                                                                                                                                                                                                                                                                 |
| #1     | ("stress disorders, post-traumatic"[Mesh] OR PTSD*[tiab] OR posttrauma*[tiab] OR "post trauma*" [tiab]OR post-trauma*[tiab] OR trauma* [tiab] OR psychotrauma*[tiab] OR stress*[tiab])                                                                                                                                                                                                                                                                                                                                                                                                                                          |
| #2     | ("HIV Infections"[Mesh] OR "HIV" [MeSH] OR "human immunodeficiency virus" [tiab] OR "human immuno deficiency virus" [tiab] OR "human immune deficiency virus" [tiab] OR "human immunodeficiency virus" [tiab] OR "AIDS" [tiab] OR "acquired immunodeficiency syndrome" [tiab] OR "acquired immunodeficiency syndromes" [tiab] OR "acquired immuno deficiency syndrome" [tiab] OR "acquired immuno deficiency syndromes" [tiab] OR "acquired immune deficiency syndrome" [tiab] OR "acquired immune deficiency syndromes" [tiab] OR "acquired immunodeficiency syndrome" [tiab] OR "acquired immunodeficiency syndromes" [tiab]) |
| #3     | ((((((("Prevalence"[Mesh] OR "Epidemiology"[Mesh] OR "Cross-Sectional Studies"[Mesh])) OR Prevalence) OR Epidemiology) OR Cross-Sectional Studies) OR "Longitudinal Studies"[Mesh]) OR "Cohort Studies"[Mesh]) OR Cohort Studies) OR Longitudinal Studies))                                                                                                                                                                                                                                                                                                                                                                     |
| #4     | #1 AND #2 AND #3                                                                                                                                                                                                                                                                                                                                                                                                                                                                                                                                                                                                                |

### Search Filters

- a. Human studies
- b. Language – English/Chinese
- c. Publication dates – From 2000/01/01 to 2019/11/31

## Appendix 2 – Risk of bias and quality of included studies

| Country      | Year | Citation        | 1   | 2   | 3   | 4       | 5       | 6   | 7   | 8   | 9   | 10  | 11  | Quality  |
|--------------|------|-----------------|-----|-----|-----|---------|---------|-----|-----|-----|-----|-----|-----|----------|
| USA          | 2019 | Fabian 2019     | yes | yes | no  | unclear | unclear | no  | no  | yes | no  | yes | yes | moderate |
| China        | 2018 | Cheng 2018      | yes | yes | yes | unclear | unclear | yes | no  | no  | no  | no  | no  | moderate |
| South Africa | 2018 | Spies 2018      | yes | yes | no  | no      | unclear | yes | no  | yes | no  | no  | no  | moderate |
| Zimbabwe     | 2018 | Verhey 2018     | yes | yes | yes | no      | unclear | yes | yes | no  | no  | yes | no  | moderate |
| China        | 2018 | Gao 2018        | yes | yes | yes | no      | unclear | no  | no  | yes | no  | no  | no  | moderate |
| USA          | 2017 | McLean 2017     | yes | yes | yes | no      | unclear | yes | yes | yes | no  | yes | no  | moderate |
| USA          | 2017 | Kemppainen 2017 | yes | yes | no  | no      | unclear | no  | no  | no  | no  | no  | no  | low      |
| USA          | 2016 | Gonzalez 2016   | yes | yes | yes | no      | unclear | yes | yes | yes | no  | yes | no  | moderate |
| USA          | 2016 | Rubin 2016      | yes | yes | yes | no      | no      | no  | yes | yes | yes | yes | no  | moderate |
| USA          | 2016 | John 2016       | yes | no  | yes | yes     | no      | yes | no  | no  | no  | no  | no  | moderate |
| USA          | 2016 | Julnes 2016     | yes | yes | yes | no      | unclear | no  | yes | yes | no  | no  | no  | moderate |
| China        | 2016 | Zhang 2016      | yes | yes | no  | no      | no      | no  | no  | no  | no  | yes | no  | low      |
| USA          | 2015 | Battaglia 2015  | yes | yes | yes | no      | unclear | no  | no  | no  | no  | yes | no  | moderate |
| South Africa | 2015 | Hansrod 2015    | yes | yes | yes | no      | unclear | yes | no  | yes | no  | no  | no  | moderate |
| USA          | 2015 | Brownley 2015   | yes | yes | yes | unclear | unclear | no  | no  | no  | no  | yes | no  | moderate |
| USA          | 2014 | Malee 2014      | yes | yes | yes | no      | unclear | no  | yes | yes | yes | yes | yes | high     |
| USA          | 2014 | Glémaud 2014    | yes | yes | yes | unclear | unclear | no  | no  | no  | no  | no  | no  | low      |

1  
2  
3  
4  
5  
6  
7  
8  
9  
10  
11  
12  
13  
14  
15  
16  
17  
18  
19  
20  
21  
22  
23  
24  
25  
26  
27  
28  
29  
30  
31  
32  
33  
34  
35  
36  
37  
38  
39  
40  
41  
42  
43  
44  
45  
46  
47

|              |      |                  |     |     |     |         |         |     |     |     |     |     |     |          |
|--------------|------|------------------|-----|-----|-----|---------|---------|-----|-----|-----|-----|-----|-----|----------|
| USA          | 2013 | Gore-Felton 2013 | yes | yes | no  | no      | unclear | yes | no  | no  | no  | no  | no  | low      |
| USA          | 2013 | Glover 2013      | yes | yes | no  | unclear | unclear | yes | yes | yes | yes | yes | yes | high     |
| Haiti        | 2013 | Dévioux 2013     | yes | yes | yes | no      | unclear | no  | no  | yes | no  | no  | no  | moderate |
| Rwanda       | 2013 | Gard 2013        | yes | yes | yes | unclear | no      | no  | yes | yes | no  | yes | no  | moderate |
| Gambia       | 2012 | Peterson 2012    | yes | yes | yes | yes     | yes     | no  | yes | yes | yes | yes | no  | high     |
| Uganda       | 2011 | Kinyanda 2011    | yes | yes | yes | yes     | unclear | no  | yes | yes | no  | yes | no  | moderate |
| USA          | 2011 | Bogart 2011      | yes | yes | yes | no      | unclear | no  | yes | yes | no  | no  | no  | moderate |
| UK           | 2011 | Martin 2011      | yes | yes | yes | no      | unclear | no  | no  | no  | no  | yes | no  | moderate |
| USA          | 2011 | Reisner 2011     | yes | yes | yes | no      | unclear | no  | yes | yes | yes | no  | no  | moderate |
| UK           | 2010 | Theunink 2010    | yes | no  | no  | no      | no      | no  | no  | no  | no  | no  | no  | low      |
| South Africa | 2010 | Joska 2010       | yes | yes | no  | unclear | unclear | yes | no  | yes | yes | no  | no  | moderate |
| Nigeria      | 2009 | Adewuya 2009     | yes | yes | no  | no      | unclear | no  | no  | yes | no  | yes | no  | moderate |
| South Africa | 2009 | Spies 2009       | yes | yes | no  | no      | unclear | yes | no  | yes | no  | yes | no  | moderate |
| South Africa | 2008 | Fincham 2008     | yes | yes | yes | yes     | unclear | no  | yes | yes | yes | no  | no  | moderate |
| USA          | 2007 | Zanjani 2007     | yes | yes | yes | no      | unclear | no  | no  | yes | yes | no  | no  | moderate |
| USA          | 2007 | Israelski 2007   | yes | yes | yes | unclear | unclear | no  | no  | no  | no  | no  | no  | low      |
| USA          | 2006 | Boarts 2006      | yes | no  | no  | no      | unclear | yes | yes | yes | no  | no  | yes | moderate |
| USA          | 2005 | Leserman 2005    | yes | yes | no  | yes     | no      | no  | yes | yes | yes | yes | no  | high     |
| South Africa | 2003 | Olley 2003       | yes | yes | no  | yes     | unclear | no  | no  | yes | no  | no  | no  | moderate |

|     |      |                  |     |     |    |     |         |    |     |    |    |     |     |          |
|-----|------|------------------|-----|-----|----|-----|---------|----|-----|----|----|-----|-----|----------|
| USA | 2003 | Vitiello<br>2003 | yes | no  | no | no  | unclear | no | yes | no | no | yes | yes | moderate |
| USA | 2002 | Martinez<br>2002 | yes | yes | no | yes | unclear | no | yes | no | no | yes | no  | moderate |

Risk of bias was assessed using the Agency for Healthcare Research and Quality (AHRQ). The checklist included 11 items. Each item was coded with a “yeses/No/Unclear”: “No” or “Unclear” was scored “0”, and “yeses” was scored “1”. Total score out of 11 where 8-11, 4-7, and 0-3 depict high, moderate and low quality, respectively.

# MOOSE Checklist

| Items                                                                                                                                                                                                                                                           | Page #     | Comments       |
|-----------------------------------------------------------------------------------------------------------------------------------------------------------------------------------------------------------------------------------------------------------------|------------|----------------|
| <b>TITLE</b> Identify the study as a meta-analysis (or systematic review)                                                                                                                                                                                       | 3          |                |
| <b>ABSTRACT</b> Use the journal's structured format                                                                                                                                                                                                             | 3,4        |                |
| <b>INTRODUCTION</b>                                                                                                                                                                                                                                             |            |                |
| · The clinical problem                                                                                                                                                                                                                                          | 5,6        |                |
| · The hypothesis                                                                                                                                                                                                                                                | 5          |                |
| · A statement of objectives that includes the study population, the condition of interest, the exposure or intervention, and the outcome(s) considered                                                                                                          | 7          |                |
| <b>SOURCES</b>                                                                                                                                                                                                                                                  |            |                |
| · Qualifications of searchers (eg, librarians and investigators)                                                                                                                                                                                                | 8          | 1 psychiatrist |
| · Search strategy, including time period included in the synthesis and keywords                                                                                                                                                                                 | 7,8        |                |
| · Effort to include all available studies, including contact with authors                                                                                                                                                                                       | 8          |                |
| · Databases and registries searched                                                                                                                                                                                                                             | 7          |                |
| · Search software used, name and version, including special features used (eg, explosion)                                                                                                                                                                       | -          |                |
| · Use of hand searching (eg, reference lists of obtained articles)                                                                                                                                                                                              | 8          |                |
| · List of citations located and those excluded, including justification                                                                                                                                                                                         | figure 1   |                |
| · Method of addressing articles published in languages other than English                                                                                                                                                                                       | 7          |                |
| · Method of handling abstracts and unpublished studies                                                                                                                                                                                                          | -          | Not applicable |
| · Description of any contact with authors                                                                                                                                                                                                                       | -          |                |
| <b>STUDY SELECTION</b>                                                                                                                                                                                                                                          |            |                |
| · Types of study designs considered                                                                                                                                                                                                                             | 8          | Observational  |
| · Relevance or appropriateness of studies gathered for assessing the hypothesis to be tested                                                                                                                                                                    | 7,8        |                |
| · Rationale for the selection and coding of data (eg, sound clinical principles or convenience)                                                                                                                                                                 | 7,8        |                |
| · Documentation of how data were classified and coded (eg, multiple raters, blinding, etc)                                                                                                                                                                      | 8,9        |                |
| · Assessment of confounding (eg, comparability of cases and controls in studies where appropriate)                                                                                                                                                              | -          | Not applicable |
| · Assessment of study quality, including blinding of quality assessors; stratification or regression on possible predictors of study results                                                                                                                    | 9,10       |                |
| · Assessment of heterogeneity                                                                                                                                                                                                                                   | 10         |                |
| · Statistical methods (eg, complete description of fixed or random effects models, justification of whether the chosen models account for predictors of study results, dose-response models, or cumulative meta-analysis) in sufficient detail to be replicated | 10         |                |
| <b>RESULTS</b>                                                                                                                                                                                                                                                  |            |                |
| · A graph summarizing individual study estimates and the overall estimate                                                                                                                                                                                       | Figure 1,2 |                |
| · A table giving descriptive information for each included study                                                                                                                                                                                                | Tables 1   |                |
| · Results of sensitivity testing (eg, subgroup analysis)                                                                                                                                                                                                        | 17,18      |                |
| · Indication of statistical uncertainty of findings                                                                                                                                                                                                             | 17         |                |
| <b>DISCUSSION</b>                                                                                                                                                                                                                                               |            |                |
| · Strengths and weaknesses                                                                                                                                                                                                                                      | 22-27      |                |
| · Potential biases in the review process (eg, publication bias)                                                                                                                                                                                                 | 27         |                |
| · Justification for exclusion (eg, exclusion of non-English-language citations)                                                                                                                                                                                 | -          |                |
| · Assessment of quality of included studies                                                                                                                                                                                                                     | 26         |                |
| · Consideration of alternative explanations for observed results                                                                                                                                                                                                | 27         |                |
| · Generalization of the conclusions (ie, appropriate for the data presented and within the domain of the literature review)                                                                                                                                     | 28         |                |
| · Guidelines for future research                                                                                                                                                                                                                                | 27,28      |                |
| · Disclosure of funding source                                                                                                                                                                                                                                  | 29         |                |

# BMJ Open

## A global estimate of the prevalence of posttraumatic stress disorder among adults living with HIV: A systematic review and meta-analysis

|                                 |                                                                                                                                                                                                                                                                                                             |
|---------------------------------|-------------------------------------------------------------------------------------------------------------------------------------------------------------------------------------------------------------------------------------------------------------------------------------------------------------|
| Journal:                        | <i>BMJ Open</i>                                                                                                                                                                                                                                                                                             |
| Manuscript ID                   | bmjopen-2019-032435.R2                                                                                                                                                                                                                                                                                      |
| Article Type:                   | Original research                                                                                                                                                                                                                                                                                           |
| Date Submitted by the Author:   | 16-Jan-2020                                                                                                                                                                                                                                                                                                 |
| Complete List of Authors:       | TANG, chulei; Central South University Xiangya School of Nursing, Goldsamt, Lloyd; NYU College of Nursing, Meng, Jingjing; Central South University Xiao, Xueling; Central South University Zhang, Li; Central South University Williams, Ann; New York University Wang, Honghong; Central South University |
| <b>Primary Subject Heading</b>: | Global health                                                                                                                                                                                                                                                                                               |
| Secondary Subject Heading:      | Epidemiology, Mental health, HIV/AIDS                                                                                                                                                                                                                                                                       |
| Keywords:                       | Posttraumatic stress disorder, HIV/AIDS, Prevalence, Meta-analysis                                                                                                                                                                                                                                          |
|                                 |                                                                                                                                                                                                                                                                                                             |

SCHOLARONE™  
Manuscripts





I, the Submitting Author has the right to grant and does grant on behalf of all authors of the Work (as defined in the below author licence), an exclusive licence and/or a non-exclusive licence for contributions from authors who are: i) UK Crown employees; ii) where BMJ has agreed a CC-BY licence shall apply, and/or iii) in accordance with the terms applicable for US Federal Government officers or employees acting as part of their official duties; on a worldwide, perpetual, irrevocable, royalty-free basis to BMJ Publishing Group Ltd ("BMJ") its licensees and where the relevant Journal is co-owned by BMJ to the co-owners of the Journal, to publish the Work in this journal and any other BMJ products and to exploit all rights, as set out in our [licence](#).

The Submitting Author accepts and understands that any supply made under these terms is made by BMJ to the Submitting Author unless you are acting as an employee on behalf of your employer or a postgraduate student of an affiliated institution which is paying any applicable article publishing charge ("APC") for Open Access articles. Where the Submitting Author wishes to make the Work available on an Open Access basis (and intends to pay the relevant APC), the terms of reuse of such Open Access shall be governed by a Creative Commons licence – details of these licences and which [Creative Commons](#) licence will apply to this Work are set out in our licence referred to above.

Other than as permitted in any relevant BMJ Author's Self Archiving Policies, I confirm this Work has not been accepted for publication elsewhere, is not being considered for publication elsewhere and does not duplicate material already published. I confirm all authors consent to publication of this Work and authorise the granting of this licence.

**TITLE PAGE**

**Title:** A global estimate of the prevalence of posttraumatic stress disorder among adults living with HIV: A systematic review and meta-analysis

**Running head:** Posttraumatic stress disorder, HIV, Prevalence, Meta-analysis

**Authors:**

1. Chulei TANG, BSN, RN

Xiangya School of Nursing, Central South University, Changsha, China

ORCID: 0000-0003-3178-5130

2. Lloyd A Goldsamt, PhD, Senior Research Scientist

Rory Meyers College of Nursing, New York University, 433 First Avenue, New York 10013, USA

3. Jingjing MENG, BSN, RN

Xiangya School of Nursing, Central South University, Changsha, China

4. Xueling XIAO, MSN, RN

Xiangya School of Nursing, Central South University, Changsha, China

5. Li ZHANG, MSN, RN

Xiangya School of Nursing, Central South University, Changsha, China

6. Ann Bartley Williams, PhD, Professor

Rory Meyers College of Nursing, New York University, 433 First Avenue, New York 10013, USA

7. Honghong WANG, RN, MSN, PhD, Professor

Xiangya School of Nursing, Central South University, Changsha, China.

1  
2  
3  
4 **Corresponding author**

5  
6 Honghong WANG

7  
8 Xiangya School of Nursing, Central South University

9  
10 172 Tongzipo road, Changsha 410013, Hunan, China

11  
12  
13 Email: honghong\_wang@hotmail.com

14  
15 Telephone number: 0731-82650270

16  
17 Fax number: 0731-82650270

18  
19  
20  
21 **Keywords** Posttraumatic stress disorder, HIV/AIDS, Prevalence, Meta-analysis

22  
23 **Word count: 3674 words**

1  
2  
3  
4  
5 **A global estimate of the prevalence of posttraumatic stress disorder among adults**  
6  
7 **living with HIV: A systematic review and meta-analysis**  
8  
9

10  
11  
12  
13 **ABSTRACT**  
14

15 **Objectives** Although people living with HIV (PLWH) have been disproportionately  
16 affected by posttraumatic stress disorder (PTSD), the global prevalence of PTSD among  
17 PLWH is unknown. This study aimed to systematically review the prevalence of PTSD  
18 among PLWH worldwide and explore variation in prevalence across sociodemographic  
19 and methodological factors.  
20  
21  
22  
23  
24  
25  
26  
27

28 **Design** A meta-analysis using a random-effect model was conducted to pool the  
29 prevalence estimated from individual studies, and subgroup analyses were used to  
30 analyse heterogeneities.  
31  
32  
33  
34  
35

36 **Setting, participants and measures** Observational studies providing PTSD prevalence  
37 data in an adult HIV population were searched from January 2000 to November 2019.  
38  
39 Measurements were not restricted, although the definition of PTSD had to align with the  
40 Diagnostic and Statistical Manual of Mental Disorders (DSM) or the International  
41 Classification of Diseases (ICD) diagnostic criteria.  
42  
43  
44  
45  
46  
47  
48

49 **Results** A total of 38 articles were included among 2406 records identified initially. The  
50 estimated global prevalence of PTSD in PLWH was 28% (95% CI 24-33%). Significant  
51 heterogeneity was detected in the proportion of PLWH who reported PTSD across  
52 studies, which was partially explained by geographic area, population group,  
53  
54  
55  
56  
57  
58  
59  
60

1  
2  
3  
4  
5 measurement and sampling method ( $p<0.05$ ).  
6

7 **Conclusion** PTSD among PLWH is common worldwide. This review highlights that  
8 PTSD should be routinely screened for and that more effective prevention strategies and  
9  
10 PTSD should be routinely screened for and that more effective prevention strategies and  
11  
12 treatment packages targeting PTSD are needed in PLWH.  
13  
14  
15  
16

### 17 **Strengths and limitations of this study**

- 18 ● This is the first meta-analysis providing comprehensive assessment on the  
19 prevalence of posttraumatic stress disorder (PTSD) among adults living with HIV.  
20  
21 ● Several subgroup analyses were conducted to examine the influence of diverse  
22 sociodemographic backgrounds as well as methodological heterogeneity.  
23  
24 ● This review was conducted with specific definitions of PTSD as part of the  
25 inclusion criteria to help in acquiring high level of evidence, which also limited the  
26 number of eligible studies.  
27  
28 ● A lack of studies carried out on the topic in low-income and middle-income  
29 countries could underestimate the burden of HIV-PTSD prevalence of the world.  
30  
31 ● We did not undertake a search of grey literature, restricting our sample to articles  
32 published in peer-reviewed journals.  
33  
34  
35  
36  
37  
38  
39  
40  
41  
42  
43  
44  
45  
46  
47  
48  
49  
50  
51  
52  
53  
54  
55  
56  
57  
58  
59  
60

## INTRODUCTION

Globally, there were more than 36 million people living with HIV (PLWH) by the end of 2017.<sup>1</sup> Although increasingly expanded access to antiretroviral therapy (ART) has led to a prolonged life span, a large portion of PLWH still suffer a significant burden due to psychiatric disorders.<sup>2,3</sup> Posttraumatic stress disorder (PTSD) is a mental health condition following exposure to a life-threatening event, or extreme or repeated exposure to traumatic events.<sup>4</sup> A growing body of literature indicates that HIV-infected people have a heightened risk for PTSD.<sup>5-6</sup> PLWH are more likely to report a history of traumatic and stressful life experiences than the general population, including childhood sexual/physical abuse and intimate partner violence.<sup>7-9</sup> PTSD may precede an HIV-positive diagnosis due to previous traumatic experiences. In addition, being diagnosed with HIV, a life-threatening illness, is a potentially traumatic event in and of itself, and PTSD may emerge as a result of this diagnosis. Infection with HIV not only causes a progressive destruction of the immune system, which increases the susceptibility to malignancies that threaten a person's life, but being labeled and associated with HIV stigma, taking multiple daily medications and experiencing repeated unpleasant side effects also constitute potentially traumatic events.<sup>10</sup> These high rates of potential trauma exposure during the course of the illness may also increase the likelihood of developing PTSD.

Generally, the concept of PTSD has been broadly applied to military veterans, survivors of disasters and accidents, and victims of violent assaults. PTSD as a serious

1  
2  
3  
4  
5 and costly health problem in the general population is well recognized, and not only  
6  
7  
8 impairs a person's physical health, but also greatly influences social functioning.<sup>11</sup> The  
9  
10 co-occurrence of PTSD and HIV-infection creates even more challenges regarding both  
11  
12 the treatment of PTSD and the management of HIV. PTSD can negatively impact  
13  
14 medication adherence and impair immune functioning,<sup>12-15</sup> both of which are especially  
15  
16 critical for PLWH. HIV-infected patients with PTSD have been found to be at increased  
17  
18 risk of somatization and physical disorders.<sup>16</sup> The illness experience of PTSD, such as  
19  
20 persistent avoidance and re-experiencing the traumatic event, may also compromise  
21  
22 quality of life and cause significant distress in PLWH.<sup>7 17</sup> Subsequently, prolonged and  
23  
24 untreated PTSD may lead to exacerbation of PTSD as well as HIV progression.<sup>18</sup> There  
25  
26 is also evidence suggesting that reductions in PTSD symptom severity are related to  
27  
28 improved HIV-risk related outcomes.<sup>19</sup> Given that PTSD elevates HIV-risk behaviors<sup>20</sup>  
29  
30 and the possibility of HIV transmission also increases along with disease progression,  
31  
32 PLWH suffering from PTSD are an important group to understand and with whom to  
33  
34 intervene.  
35  
36  
37  
38  
39  
40  
41  
42  
43

44 Valid data on PTSD prevalence among PLWH is essential. Evidence on the extent  
45  
46 of PTSD among PLWH is needed to raise awareness and recommend clinical  
47  
48 management. Although a number of studies have investigated the prevalence of PTSD  
49  
50 in PLWH, findings have been inconsistent.<sup>22</sup> While studies have reported varied  
51  
52 incidence, few efforts have been made to aggregate existing research using meta-  
53  
54 analysis techniques. There was one published meta-analysis estimating the pooled  
55  
56  
57  
58  
59  
60

1  
2  
3  
4  
5 prevalence of PTSD among women living with HIV in 2012.<sup>23</sup> But the lack of studies  
6  
7  
8 with other groups lowered the generalizability and global relevance of their findings.  
9  
10 Moreover, the meta-analysis was conducted in 2012, and the increase of publications  
11  
12 about PTSD among PLWH since then<sup>24-26</sup> suggests that a timely update is urgently  
13  
14  
15 needed. Indeed, several reviews provide a useful overview of the possible prevalence of  
16  
17 PTSD among PLWH;<sup>22-27</sup> however, a number of gaps remain. First, to date, there has  
18  
19  
20 been no attempt to achieve a better understanding of the epidemiology of PTSD in  
21  
22  
23 PLWH and the reviews did not aim at an overall PTSD prevalence specifically. Second,  
24  
25 economically and politically, while precise estimates of prevalence can support efficient  
26  
27 allocation of resources, factors that might influence PTSD prevalence, such as  
28  
29  
30 population characteristics and socio-cultural context have been neglected.  
31  
32

33  
34 Therefore, to fill these knowledge gaps, we aimed to provide an estimate for the  
35  
36 worldwide prevalence of PTSD in PLWH and to test whether PTSD prevalence in  
37  
38  
39 PLWH differs based between population groups, country income groups and study  
40  
41 characteristics. This information can then be used to inform further practice and  
42  
43  
44 research for this highly co-morbid group.  
45

## 46 **METHODS**

### 47 **Search strategy**

48  
49 Systematic searches were conducted through 5 electronic English databases (Medline,  
50  
51  
52 Web of Science, CINAHL, EMBASE and Cochrane Library) and 3 Chinese databases  
53  
54  
55 (CNKI, Wanfang Database, Sinomed) to identify published studies on PTSD prevalence  
56  
57  
58  
59  
60



1  
2  
3  
4  
5 among PLWH from January 2000 to November 2019. The search terms were:  
6  
7 posttrauma\*, post trauma\*, post-trauma\*, stress disorder\*, OR PTSD; AND HIV,  
8  
9  
10 acquired immunodeficiency syndrome, AIDS, OR PLWH\$; AND epidemiology,  
11  
12 occurrence, incidence, OR prevalence (see online supplementary appendix 1 for the  
13  
14 precise search strategy). The reference lists of review articles and retrieved full-text  
15  
16 articles were also examined for additional papers that were eligible for this review.  
17  
18  
19

### 20 21 **Eligibility criteria**

22  
23 Studies were included for this meta-analysis if they met the following predetermined  
24  
25 selection criteria: (1) published in Chinese or English in a peer reviewed journal; (2)  
26  
27 observational study where prevalence figures for PTSD were stated or can be calculated  
28  
29 in an adult HIV population; and (3) underlined that PTSD cases were identified in  
30  
31 accordance with the Diagnostic and Statistical Manual of Mental Disorders (DSM) or  
32  
33 the International Classification of Diseases (ICD) diagnostic criteria.<sup>28 29</sup> Studies were  
34  
35 excluded if (1) they only recruited those who had mental distress; (2) they specifically  
36  
37 targeted only youth under 18 or children affected by HIV. No restriction was applied  
38  
39 regarding gender, nationality, or sexual orientation. Additionally, articles were reviewed  
40  
41 closely, and if repeated data were observed, only the earlier publication with one set of  
42  
43 complete data was included.  
44  
45  
46  
47  
48  
49

### 50 51 **Data extraction and analysis**

52  
53 Screening of papers was carried out by three of the authors (C.T., J.M. and X.X.)  
54  
55 following PRISMA recommendations. C.T and X.X. searched the English papers and  
56  
57  
58  
59  
60

1  
2  
3  
4  
5 J.M. screened the Chinese language papers. After duplicates were deleted, each  
6  
7  
8 investigator read titles and abstracts closely to capture all potential studies. Full-text  
9  
10  
11 articles were obtained and reviewed for all criteria. Any discrepancies were resolved by  
12  
13 discussion with the research team. The PRISMA flow chart shows the results of the  
14  
15 systematic search (figure 1)  
16

### 17 **Data extraction**

18  
19  
20 Two authors (C.T. and X.X.) used a data extraction sheet to capture the following data  
21  
22  
23 independently from included papers: first author, year of publication, country of study,  
24  
25  
26 sampling method, sample size, number of patients with PTSD, measurements and  
27  
28  
29 outcome data. The third investigator (H.W.) helped to verify all extracted data and  
30  
31  
32 resolve any uncertainties. To facilitate detection of sample/methodological  
33  
34  
35 heterogeneity, countries were categorized according to their income level, and  
36  
37  
38 measurements were classified into diagnostic questionnaire and clinical interview based  
39  
40  
41 on the approach to diagnosing PTSD. To minimize selection bias, we reviewed the  
42  
43  
44 articles included in the meta-analysis to ensure they met eligibility criteria. Gender and  
45  
46  
47 sexual orientation were considered because of underlying differences in the epidemics  
48  
49  
50 of HIV and trauma.<sup>30-32</sup> Specifically, populations were grouped as women and men, and  
51  
52  
53 samples of HIV-infected men were further classified into men who have sex with men  
54  
55  
56 (MSM) and non-MSM males.

### 54 **Assessment of methodological quality**

55  
56  
57 We used the quality assessment forms for cross-sectional/prevalence studies  
58  
59  
60

1  
2  
3  
4  
5 recommended by the U.S. Agency for Healthcare Research and Quality (AHRQ)<sup>33</sup> to  
6  
7 assess the reliability of the eligible studies. The checklist included 11 items. Each item  
8  
9 was coded with a “Yes/No/Unclear”: “No” or “Unclear” was scored “0”, and “Yes” was  
10  
11 scored “1”. Consistent with previous meta-analysis studies using the AHRQ  
12  
13 assessments, a total score of 8-11, 4-7, and 0-3 indicated high, moderate and low  
14  
15 quality, respectively.  
16  
17  
18  
19

## 20 **Meta-analysis**

21  
22  
23 In this study, all statistical analyses were performed using Stata 12.0 software (STATA  
24  
25 Corporation, College Station, TX)<sup>34</sup>. Heterogeneity was tested and quantified by the  
26  
27 chi-square Q statistic and the  $I^2$  statistic. The prevalence of PTSD among PLWH were  
28  
29 combined and reported as proportions with corresponding 95% Confidence Intervals  
30  
31 (CI). The pooled prevalence was estimated using a random-effects model when  
32  
33 heterogeneity was statistically significant ( $I^2 > 50\%$ ,  $p \leq 0.10$ ). Otherwise, a fix-effects  
34  
35 model was used.<sup>35</sup> As sources of heterogeneity may arise from socio-demographic and  
36  
37 methodological factors, subgroup analyses were performed by (1) economic levels of  
38  
39 the study country, (2) gender/sexual orientation, (3) sampling method and (4)  
40  
41 assessment method for PTSD, when enough data was available. Chi-square ( $\chi^2$ ) tests  
42  
43 were further used to investigate whether there were significant differences between  
44  
45 groups. We only performed these subgroup analyses when data were extractable and  
46  
47 sufficient. Separate sensitivity analyses were used for studies with low quality to  
48  
49 examine the stability of the pooled prevalence. Publication bias was assessed using the  
50  
51  
52  
53  
54  
55  
56  
57  
58  
59  
60

1  
2  
3  
4  
5 Egger's and the Begg's tests.<sup>36-37</sup> Significance level of  $p$  values  $< 0.05$  were employed  
6  
7  
8 for all analyses.

### 9 10 **Patient and public involvement**

11  
12 Patients and the public were not involved in this study.

### 13 14 15 **Ethics approval**

16  
17  
18 As this study is a systematic review based on published studies, ethical approval is not  
19  
20  
21 required.

## 22 23 **RESULTS**

### 24 25 **Search results**

26  
27  
28 A total of 2396 records were identified by the electronic bibliographic database  
29  
30  
31 searches. Ten additional manuscripts were identified through other sources (e.g.,  
32  
33  
34 reference lists of review papers). From an initial screen of 2301 records after duplicates  
35  
36  
37 were removed, 2185 records were excluded on basis of title or abstract because those  
38  
39  
40 studies were not relevant to this review ( $n=2107$ ) or were reviews/commentary ( $n= 78$ ).  
41  
42  
43 The remaining 116 full articles were selected for the eligibility assessment. Of those, 7  
44  
45  
46 were excluded for repeated data, 9 were excluded for targeting PLWH who received  
47  
48  
49 psychological intervention or suffered from genocide/natural disaster, and 62 were  
50  
51  
52 excluded for not reporting the PTSD prevalence among PLWH. Finally, a total of 38  
53  
54  
55 studies<sup>14 24 25 38-72</sup> met inclusion criteria and were included in this meta-analysis. Search  
56  
57  
58 results are elaborated in Figure 1.

### 59 60 **Study characteristics**

1  
2  
3  
4  
5 Most of the papers (84.3%) scored 4 or more according to the AHRQ scale indicating a  
6  
7 generally moderate to high level of data quality (online supplementary appendix 2).  
8  
9

10 Table 1 shows the characteristics of the included studies. These studies were published  
11  
12 between 2002<sup>72</sup> and 2019.<sup>38</sup> Geographically, over half (n=21, 55.3%) of the 38 included  
13  
14 studies were conducted in the USA, followed by South Africa (n=6, 15.8%), China  
15  
16 (n=3, 7.9%), the United Kingdom (n=2, 5.3%), Rwanda (n=1, 2.6%) and low-income  
17  
18 countries including Gambia (n=1, 2.6%), Nigeria (n=1, 2.6%), Uganda (n=1, 2.6%),  
19  
20 Haiti (n=1, 2.6%) and Zimbabwe (n=1, 2.6%). Twenty-five studies (65.8%) measured  
21  
22 PTSD using diagnostic self-report questionnaires, while the other 13 studies (34.2%)  
23  
24 conducted clinical interviews to diagnose PTSD. Though 8 studies (21.1%) did not  
25  
26 report their sampling methods, convenience sampling methods were adopted in most  
27  
28 studies (n=20, 52.6%), followed by consecutive sampling (n=7, 18.4%), and probability  
29  
30 sampling (n=3, 7.9%). In all, 11743 PLWH were involved (sample size varied from 41  
31  
32 to 1489), of which 2742 were identified with PTSD.  
33  
34  
35  
36  
37  
38  
39  
40  
41  
42  
43  
44  
45  
46  
47  
48  
49  
50  
51  
52  
53  
54  
55  
56  
57  
58  
59  
60

**Table 1 Characteristics of the included studies**

| First author             | Year of publication | Location of study | Sampling methods     | Sample size* | No. of patients with PTSD | Measurements | Data Collection           | Quality  |
|--------------------------|---------------------|-------------------|----------------------|--------------|---------------------------|--------------|---------------------------|----------|
| Fabian <sup>38</sup>     | 2019                | USA               | convenience sampling | 238          | 80                        | PCL-C        | self-report questionnaire | moderate |
| Cheng <sup>39</sup>      | 2018                | China             | unclear              | 535          | 142                       | PCL-C        | self-report questionnaire | moderate |
| Spies <sup>40</sup>      | 2018                | South Africa      | convenience sampling | 68           | 10                        | DTS          | self-report questionnaire | moderate |
| Verhey <sup>41</sup>     | 2018                | Zimbabwe          | random sampling      | 91           | 22                        | CAPS         | clinical interview        | moderate |
| Gao <sup>42</sup>        | 2018                | China             | convenience sampling | 520          | 89                        | PCL-C        | self-report questionnaire | moderate |
| McLean <sup>43</sup>     | 2017                | USA               | convenience sampling | 42           | 12                        | PSS          | clinical interview        | moderate |
| Kemppainen <sup>25</sup> | 2017                | USA               | convenience sampling | 60           | 26                        | PCL-C        | self-report questionnaire | low      |
| Gonzalez <sup>24</sup>   | 2016                | USA               | convenience sampling | 137          | 47                        | PDS          | self-report questionnaire | moderate |
| Rubin <sup>44</sup>      | 2016                | USA               | convenience sampling | 1004         | 174                       | PCL-C        | self-report questionnaire | moderate |

|    |                           |      |              |                      |      |     |                 |                           |          |
|----|---------------------------|------|--------------|----------------------|------|-----|-----------------|---------------------------|----------|
| 1  |                           |      |              |                      |      |     |                 |                           |          |
| 2  |                           |      |              |                      |      |     |                 |                           |          |
| 3  |                           |      |              |                      |      |     |                 |                           |          |
| 4  |                           |      |              |                      |      |     |                 |                           |          |
| 5  | John <sup>45</sup>        | 2016 | USA          | consecutive sampling | 359  | 44  | Breslau         | self-report questionnaire | moderate |
| 6  |                           |      |              |                      |      |     |                 |                           |          |
| 7  |                           |      |              |                      |      |     |                 |                           |          |
| 8  | Julnes <sup>14</sup>      | 2016 | USA          | convenience sampling | 114  | 39  | CDQ             | self-report questionnaire | moderate |
| 9  |                           |      |              |                      |      |     |                 |                           |          |
| 10 |                           |      |              |                      |      |     |                 |                           |          |
| 11 | Zhang <sup>46</sup>       | 2016 | China        | convenience sampling | 243  | 106 | PCL-C           | self-report questionnaire | low      |
| 12 |                           |      |              |                      |      |     |                 |                           |          |
| 13 |                           |      |              |                      |      |     |                 |                           |          |
| 14 |                           |      |              |                      |      |     |                 |                           |          |
| 15 | Battaglia <sup>47</sup>   | 2015 | USA          | convenience sampling | 200  | 72  | PTSD checklist  | self-report questionnaire | moderate |
| 16 |                           |      |              |                      |      |     |                 |                           |          |
| 17 |                           |      |              |                      |      |     |                 |                           |          |
| 18 | Hansrod <sup>48</sup>     | 2015 | South Africa | convenience sampling | 114  | 29  | MINI            | clinical interview        | moderate |
| 19 |                           |      |              |                      |      |     |                 |                           |          |
| 20 |                           |      |              |                      |      |     |                 |                           |          |
| 21 | Brownley <sup>49</sup>    | 2015 | USA          | unclear              | 220  | 78  | PSS             | self-report questionnaire | moderate |
| 22 |                           |      |              |                      |      |     |                 |                           |          |
| 23 |                           |      |              |                      |      |     |                 |                           |          |
| 24 | Malee <sup>50</sup>       | 2014 | USA          | convenience sampling | 1223 | 281 | CDQ             | self-report questionnaire | high     |
| 25 |                           |      |              |                      |      |     |                 |                           |          |
| 26 |                           |      |              |                      |      |     |                 |                           |          |
| 27 |                           |      |              |                      |      |     |                 |                           |          |
| 28 | Glémaud <sup>51</sup>     | 2014 | USA          | unclear              | 96   | 33  | PRIME MD<br>PHQ | clinical interview        | low      |
| 29 |                           |      |              |                      |      |     |                 |                           |          |
| 30 |                           |      |              |                      |      |     |                 |                           |          |
| 31 | Gore-Felton <sup>52</sup> | 2013 | USA          | convenience sampling | 94   | 28  | PCL-C           | self-report questionnaire | low      |
| 32 |                           |      |              |                      |      |     |                 |                           |          |
| 33 |                           |      |              |                      |      |     |                 |                           |          |
| 34 | Glover <sup>53</sup>      | 2013 | USA          | convenience sampling | 99   | 24  | PDS             | self-report questionnaire | high     |
| 35 |                           |      |              |                      |      |     |                 |                           |          |
| 36 |                           |      |              |                      |      |     |                 |                           |          |
| 37 | Dévioux <sup>54</sup>     | 2013 | Haiti        | convenience sampling | 104  | 52  | PCL-C           | self-report questionnaire | moderate |
| 38 |                           |      |              |                      |      |     |                 |                           |          |
| 39 |                           |      |              |                      |      |     |                 |                           |          |
| 40 |                           |      |              |                      |      |     |                 |                           |          |
| 41 |                           |      |              |                      |      |     |                 |                           |          |
| 42 |                           |      |              |                      |      |     |                 |                           |          |
| 43 |                           |      |              |                      |      |     |                 |                           |          |
| 44 |                           |      |              |                      |      |     |                 |                           |          |
| 45 |                           |      |              |                      |      |     |                 |                           |          |
| 46 |                           |      |              |                      |      |     |                 |                           |          |

|    |                         |      |              |                      |     |     |            |                           |          |
|----|-------------------------|------|--------------|----------------------|-----|-----|------------|---------------------------|----------|
| 1  |                         |      |              |                      |     |     |            |                           |          |
| 2  |                         |      |              |                      |     |     |            |                           |          |
| 3  |                         |      |              |                      |     |     |            |                           |          |
| 4  |                         |      |              |                      |     |     |            |                           |          |
| 5  | Gard <sup>55</sup>      | 2013 | Rwanda       | unclear              | 705 | 380 | HTS        | self-report questionnaire | moderate |
| 6  |                         |      |              |                      |     |     |            |                           |          |
| 7  |                         |      |              |                      |     |     |            |                           |          |
| 8  | Peterson <sup>56</sup>  | 2012 | Gambia       | consecutive sampling | 153 | 46  | IES-R      | self-report questionnaire | high     |
| 9  |                         |      |              |                      |     |     |            |                           |          |
| 10 |                         |      |              |                      |     |     |            |                           |          |
| 11 | Kinyanda <sup>57</sup>  | 2011 | Uganda       | consecutive sampling | 618 | 10  | MINI       | clinical interview        | moderate |
| 12 |                         |      |              |                      |     |     |            |                           |          |
| 13 |                         |      |              |                      |     |     |            |                           |          |
| 14 |                         |      |              |                      |     |     |            |                           |          |
| 15 | Bogart <sup>58</sup>    | 2011 | USA          | convenience sampling | 181 | 72  | PDS        | self-report questionnaire | moderate |
| 16 |                         |      |              |                      |     |     |            |                           |          |
| 17 |                         |      |              |                      |     |     |            |                           |          |
| 18 | Martin <sup>59</sup>    | 2011 | UK           | convenience sampling | 85  | 46  | CIDI       | clinical interview        | moderate |
| 19 |                         |      |              |                      |     |     |            |                           |          |
| 20 |                         |      |              |                      |     |     |            |                           |          |
| 21 | Reisner <sup>60</sup>   | 2011 | USA          | convenience sampling | 63  | 16  | AUDADIS-IV | clinical interview        | moderate |
| 22 |                         |      |              |                      |     |     |            |                           |          |
| 23 |                         |      |              |                      |     |     |            |                           |          |
| 24 | Theuninck <sup>61</sup> | 2010 | UK           | convenience sampling | 100 | 33  | PCL-C      | self-report questionnaire | low      |
| 25 |                         |      |              |                      |     |     |            |                           |          |
| 26 |                         |      |              |                      |     |     |            |                           |          |
| 27 |                         |      |              |                      |     |     |            |                           |          |
| 28 | Joska <sup>62</sup>     | 2010 | South Africa | unclear              | 536 | 164 | HTS        | self-report questionnaire | moderate |
| 29 |                         |      |              |                      |     |     |            |                           |          |
| 30 |                         |      |              |                      |     |     |            |                           |          |
| 31 | Adewuya <sup>63</sup>   | 2009 | Nigeria      | unclear              | 190 | 52  | MINI       | clinical interview        | moderate |
| 32 |                         |      |              |                      |     |     |            |                           |          |
| 33 |                         |      |              |                      |     |     |            |                           |          |
| 34 | Spies <sup>64</sup>     | 2009 | South Africa | unclear              | 429 | 92  | MINI       | clinical interview        | moderate |
| 35 |                         |      |              |                      |     |     |            |                           |          |
| 36 |                         |      |              |                      |     |     |            |                           |          |
| 37 | Fincham <sup>65</sup>   | 2008 | South Africa | consecutive sampling | 456 | 23  | MINI       | clinical interview        | moderate |
| 38 |                         |      |              |                      |     |     |            |                           |          |
| 39 |                         |      |              |                      |     |     |            |                           |          |
| 40 |                         |      |              |                      |     |     |            |                           |          |
| 41 |                         |      |              |                      |     |     |            |                           |          |
| 42 |                         |      |              |                      |     |     |            |                           |          |
| 43 |                         |      |              |                      |     |     |            |                           |          |
| 44 |                         |      |              |                      |     |     |            |                           |          |
| 45 |                         |      |              |                      |     |     |            |                           |          |
| 46 |                         |      |              |                      |     |     |            |                           |          |



|                         |      |              |                      |      |     |                |                           |          |
|-------------------------|------|--------------|----------------------|------|-----|----------------|---------------------------|----------|
| Zanjani <sup>66</sup>   | 2007 | USA          | random sampling      | 109  | 13  | MINI           | clinical interview        | moderate |
| Israelski <sup>67</sup> | 2007 | USA          | unclear              | 210  | 71  | PCL-C          | self-report questionnaire | low      |
| Boarts <sup>68</sup>    | 2006 | USA          | convenience sampling | 57   | 24  | PDS            | self-report questionnaire | moderate |
| Leserman <sup>69</sup>  | 2005 | USA          | consecutive sampling | 611  | 98  | PTSD checklist | self-report questionnaire | high     |
| Olley <sup>70</sup>     | 2003 | South Africa | consecutive sampling | 149  | 42  | MINI           | clinical interview        | moderate |
| Vitiello <sup>71</sup>  | 2003 | USA          | probability sample   | 1489 | 155 | CIDI           | clinical interview        | moderate |
| Martinez <sup>72</sup>  | 2002 | USA          | consecutive sampling | 41   | 17  | PCL-C          | self-report questionnaire | moderate |

---

\* Total number of adults living with HIV

*PCL-C* Posttraumatic Stress Disorder Checklist-Civilian Version; *DTS* Davidson Trauma Scale; *CAPS* Clinician Administered Post-traumatic Stress Scale; *CDQ* Client Diagnostic Questionnaire; *PDS* Posttraumatic Stress Diagnostic Scale – Self-report version; *PSS* Posttraumatic Stress Symptom Scale; *PRIME MD PHQ* Primary Care Evaluation of Mental Disorders Patient Health Questionnaire; *AUDADIS-IV* The Alcohol Use Disorder and Associated Disabilities Interview Schedule-IV; *MINI* Mini-International Neuropsychiatric

1  
2  
3  
4  
5 Interview; *IES-R* Impact of Event Scale-Revised; *HTS* the Harvard trauma scale; *DIS-IV* Diagnostic Interview Schedule for DSM-IV  
6  
7  
8 diagnoses; *PTSD checklist* Posttraumatic Stress Disorder Checklist; *CIDI* Clinical Interview for Diagnosis for DSM-IV  
9  
10  
11  
12  
13  
14  
15  
16  
17  
18  
19  
20  
21  
22  
23  
24  
25  
26  
27  
28  
29  
30  
31  
32  
33  
34  
35  
36  
37  
38  
39  
40  
41  
42  
43  
44  
45  
46

For peer review only

## Prevalence of PTSD in PLWH

The reported prevalence of PTSD in PLWH ranged from 1.6%<sup>57</sup> to 54.1%<sup>59</sup>. The overall pooled prevalence was 28% (95%CI: 24% to 33%), estimated by a random effects model, as significant heterogeneity ( $p \leq 0.001$ ,  $I^2=98.1\%$ ) was observed among the included studies. Meta-analyses are shown as forest plots (Fig. 2).

## Publication bias and sensitivity analysis

Possible publication bias was indicated according to the results of Egger's linear test ( $t=6.84$ ,  $p < 0.05$ ) and Begg's rank test ( $z=0.58$ ,  $p=0.56$ ). However, low sensitivity was suggested with the pooled prevalence of PTSD changed slightly from 28% (95%CI: 24% to 33%) to 27% (95%CI: 22% to 32%) after excluding low-quality articles.

## Subgroup Analyses

The results of subgroup analyses are shown in Table 2. The prevalence of PTSD in PLWH differed significantly by geographic area, population group, sampling and measurement method. Specifically, the proportion of PLWH with PTSD in high-income countries tended to be higher (pooled rate= 29%, 95%CI 25% to 34%) than middle-income countries (pooled rate= 27%, 95%CI 16% to 37%) and low-income countries (pooled rate= 26%, 95%CI 7% to 45%). Studies using clinical interviews reported lower rates of PTSD (pooled rate= 22%, 95%CI 16% to 27%) compared with those using self-report questionnaires (pooled rate= 31%, 95%CI 27% to 36%). The pooled PTSD prevalence among women living with HIV, MSM living with HIV and non-MSM men living with HIV were 35% (95%CI: 28% to 43%), 33% (95%CI: 29% to 38%) and 20%

1  
2  
3  
4  
5 (95%CI: 17% to 23%), respectively. Also, studies conducted with convenience  
6  
7  
8 sampling were more likely to have higher PTSD prevalence (pooled rate= 32%, 95%CI  
9  
10 27% to 37%) than those using consecutive sampling (pooled rate= 17%, 95%CI 10% to  
11  
12  
13 24%).  
14  
15  
16  
17  
18  
19  
20  
21  
22  
23  
24  
25  
26  
27  
28  
29  
30  
31  
32  
33  
34  
35  
36  
37  
38  
39  
40  
41  
42  
43  
44  
45  
46  
47  
48  
49  
50  
51  
52  
53  
54  
55  
56  
57  
58  
59  
60

For peer review only

**Table 2 Subgroup analyses of the prevalence of PTSD in PLWH**

| Subgroup         | Number of studies            | Positive PTSD screening (Diagnosis) | Sample size (Tested) | Pooled prevalence of PTSD (95%CI) | Heterogeneity (I <sup>2</sup> ) | Between group difference |         |        |
|------------------|------------------------------|-------------------------------------|----------------------|-----------------------------------|---------------------------------|--------------------------|---------|--------|
|                  |                              |                                     |                      |                                   |                                 | $\chi^2$                 | P value |        |
| Geographic area  | High-income countries        | 23                                  | 1483                 | 6832                              | 0.29(0.25-0.34)                 | 94.70%                   | 107.32  | <0.001 |
|                  | Middle-income countries      | 10                                  | 1077                 | 3755                              | 0.27(0.16-0.37)                 | 98.60%                   |         |        |
|                  | Low-income countries         | 5                                   | 182                  | 1156                              | 0.26(0.07-0.45)                 | 98.30%                   |         |        |
| Population group | Women living with HIV        | 15                                  | 1282                 | 4190                              | 0.35(0.28-0.43)                 | 96.10%                   | 26.99   | <0.001 |
|                  | MSM living with HIV          | 3                                   | 129                  | 380                               | 0.33(0.29-0.38)                 | 73.70%                   |         |        |
|                  | non-MSM male living with HIV | 4                                   | 165                  | 754                               | 0.20(0.17-0.23)                 | 89.10%                   |         |        |
| Sampling         | Consecutive sampling         | 7                                   | 280                  | 2387                              | 0.17(0.10-0.24)                 | 97.30%                   | 206.01  | <0.001 |
|                  | Convenience sampling         | 20                                  | 1260                 | 4746                              | 0.32(0.27-0.37)                 | 91.60%                   |         |        |

|    |                 |                           |    |      |      |                 |        |        |        |
|----|-----------------|---------------------------|----|------|------|-----------------|--------|--------|--------|
| 1  |                 |                           |    |      |      |                 |        |        |        |
| 2  |                 |                           |    |      |      |                 |        |        |        |
| 3  |                 |                           |    |      |      |                 |        |        |        |
| 4  |                 |                           |    |      |      |                 |        |        |        |
| 5  | Data collection | Self-report questionnaire | 25 | 2197 | 7812 | 0.31(0.27-0.36) | 95.70% | 297.01 | <0.001 |
| 6  |                 |                           |    |      |      |                 |        |        |        |
| 7  |                 |                           |    |      |      |                 |        |        |        |
| 8  |                 | Clinical interview        | 13 | 545  | 3931 | 0.22(0.16-0.27) | 97.20% |        |        |
| 9  |                 |                           |    |      |      |                 |        |        |        |
| 10 | <hr/>           |                           |    |      |      |                 |        |        |        |
| 11 |                 |                           |    |      |      |                 |        |        |        |
| 12 |                 |                           |    |      |      |                 |        |        |        |
| 13 |                 |                           |    |      |      |                 |        |        |        |
| 14 |                 |                           |    |      |      |                 |        |        |        |
| 15 |                 |                           |    |      |      |                 |        |        |        |
| 16 |                 |                           |    |      |      |                 |        |        |        |
| 17 |                 |                           |    |      |      |                 |        |        |        |
| 18 |                 |                           |    |      |      |                 |        |        |        |
| 19 |                 |                           |    |      |      |                 |        |        |        |
| 20 |                 |                           |    |      |      |                 |        |        |        |
| 21 |                 |                           |    |      |      |                 |        |        |        |
| 22 |                 |                           |    |      |      |                 |        |        |        |
| 23 |                 |                           |    |      |      |                 |        |        |        |
| 24 |                 |                           |    |      |      |                 |        |        |        |
| 25 |                 |                           |    |      |      |                 |        |        |        |
| 26 |                 |                           |    |      |      |                 |        |        |        |
| 27 |                 |                           |    |      |      |                 |        |        |        |
| 28 |                 |                           |    |      |      |                 |        |        |        |
| 29 |                 |                           |    |      |      |                 |        |        |        |
| 30 |                 |                           |    |      |      |                 |        |        |        |
| 31 |                 |                           |    |      |      |                 |        |        |        |
| 32 |                 |                           |    |      |      |                 |        |        |        |
| 33 |                 |                           |    |      |      |                 |        |        |        |
| 34 |                 |                           |    |      |      |                 |        |        |        |
| 35 |                 |                           |    |      |      |                 |        |        |        |
| 36 |                 |                           |    |      |      |                 |        |        |        |
| 37 |                 |                           |    |      |      |                 |        |        |        |
| 38 |                 |                           |    |      |      |                 |        |        |        |
| 39 |                 |                           |    |      |      |                 |        |        |        |
| 40 |                 |                           |    |      |      |                 |        |        |        |
| 41 |                 |                           |    |      |      |                 |        |        |        |
| 42 |                 |                           |    |      |      |                 |        |        |        |
| 43 |                 |                           |    |      |      |                 |        |        |        |
| 44 |                 |                           |    |      |      |                 |        |        |        |
| 45 |                 |                           |    |      |      |                 |        |        |        |
| 46 |                 |                           |    |      |      |                 |        |        |        |

For peer review only

## DISCUSSION

To the best of our knowledge, this is the first meta-analysis to provide the pooled estimated prevalence of PTSD among PLWH. A comprehensive search of the literature assessing the rate of comorbidity between PTSD and HIV-infection was performed, and 38 studies met the predefined criteria and were included in the meta-analysis. A total of 11743 participants were involved, of which 2742 were identified with PTSD. The estimated pooled prevalence was 28% (95% CI: 24% to 33%), which suggests a considerable burden of PTSD in the HIV-infected population. High heterogeneity across studies was detected, and factors such as differences in region, population characteristics, sampling, and measurement were associated with the prevalence.

As indicated, the PTSD prevalence among PLWH found in this study (28%) not only far exceeded that among the general population (3.9%),<sup>73</sup> but was also much higher than the prevalence of PTSD among other vulnerable groups in some previous studies. For example, the prevalence for cancer-related PTSD was 5.1%-15.3%;<sup>74</sup> in persons with chronic pain, the estimated mean prevalence of PTSD was 9.7%.<sup>75</sup> The pooled prevalence of PTSD among PLWH found in this study heightened the high rate of co-morbidity between HIV infection and PTSD, which is consistent with previous demonstrations.<sup>8 76</sup> For PLWH, although depressive symptoms have been the focus of many studies, and 36% of PLWH were likely to have depression according to nationally representative data in the U.S.,<sup>77</sup> this pooled estimated prevalence of PTSD among PLWH showed that PTSD is also a common mental disorder among individuals living

1  
2  
3  
4  
5 with HIV/AIDS. Therefore, the results of our study significantly underscore the  
6  
7 importance of early assessment and trauma-directed psychological interventions for  
8  
9 PLWH.  
10  
11

12  
13 Undoubtedly, heterogeneity between studies is expected in such a relatively large  
14  
15 topic of review. In this review, the estimated PTSD prevalence in PLWH varied widely  
16  
17 (1.6%-54.1%) across studies and countries, which is also a common problem in the  
18  
19 epidemiology of psychological and mental health disorders.<sup>78 79</sup> Consistent with the  
20  
21 findings of previous research,<sup>59</sup> the majority of studies which have determined the  
22  
23 incidence of HIV-related PTSD have been conducted in developed countries (n=23).  
24  
25 Compared with lower-income countries, higher-income countries reported relatively  
26  
27 higher prevalence of PTSD. This tendency and the varied prevalence of PTSD among  
28  
29 PLWH may be explained by the cross-cultural differences in attitudes towards HIV  
30  
31 infection. Turan et al.<sup>80</sup> found that the level of perceived HIV-related stigma in the  
32  
33 community experienced by PLWH may cause adverse health and psychosocial  
34  
35 outcomes. Social isolation and stigma might exacerbate symptoms of PTSD.<sup>81</sup> In high-  
36  
37 income countries, PLWH may experience “compound” or “layered” stigma, where  
38  
39 stigmatizing beliefs are not only associated with HIV infection but also related to sexual  
40  
41 orientation, commercial sexual behaviors, etc.<sup>82</sup> Although, HIV-related stigma is highly  
42  
43 burdensome in some mid-income countries, such as China,<sup>83 84</sup> the reported prevalence  
44  
45 of PLWH with PTSD was lower compared to higher-income countries. The differences  
46  
47 between collectivism and individualism rooted in eastern and western culture may be an  
48  
49  
50  
51  
52  
53  
54  
55  
56  
57  
58  
59  
60



1  
2  
3  
4  
5 explanation.<sup>85</sup> It is worth noting that social context may not only influence the  
6  
7  
8 susceptibility of mental health disorders, but also constitutes an important factor in  
9  
10 perceived stigma among individuals with mental illness. Compared to high-income  
11  
12 countries, stigmatizing beliefs about the causes and presence of mental illness are still  
13  
14 widespread in low- and middle-income countries,<sup>86 87</sup> which may lead to less disease  
15  
16 reporting. Caution must be applied, since there is a lack of studies investigating HIV-  
17  
18 related PTSD in lower- (n=5) and middle-income (n=10) countries. In particular,  
19  
20 detection of prevalence is associated with the representativeness and size of sample. In  
21  
22 the context of low- and middle-income countries, it could be argued that lower HIV  
23  
24 testing rates may underestimate the PTSD prevalence and impact generalizability. Thus,  
25  
26 more epidemiological studies are warranted to better understand and clarify the  
27  
28 difference in PTSD prevalence among PLWH globally.  
29  
30  
31  
32  
33  
34  
35

36 Subgroup analyses indicated that the prevalence of PTSD differed significantly  
37  
38 when gender and sexual orientation were taken into consideration. Specifically, women  
39  
40 living with HIV exhibited a higher prevalence of PTSD (35%) in comparison with both  
41  
42 MSM (33%) and non-MSM male (20%) groups. This matches the pattern of prevalence  
43  
44 in PTSD, in which being female is a risk factor associated with PTSD development.<sup>16</sup>  
45  
46  
47 As suggested by the aforementioned findings, HIV-infected MSM may experience  
48  
49 higher levels of stigma and trauma related to their sexual orientation.<sup>30 88</sup> Compared  
50  
51 with heterosexual counterparts, MSM reported higher risk for suicidal ideation,<sup>89</sup> which  
52  
53 also indicates greater psychological stress and mental health problems (i.e. PTSD and  
54  
55  
56  
57  
58  
59  
60

1  
2  
3  
4  
5 depression). The findings that MSM and female HIV-infected individuals are at higher  
6  
7 risk of developing PTSD may indicate that related health promotion campaigns should  
8  
9 be directed to these groups. Clinicians should also take into consideration the PTSD  
10  
11 susceptibility in different groups of HIV-infected populations during diagnoses.  
12  
13

14  
15 Notably, most eligible studies did not provide separate the prevalence regarding the  
16  
17 gender of participants, and only 3 studies identified PTSD prevalence among MSM  
18  
19 living with HIV. Given that these data are from a small number of studies and/or  
20  
21 participants, this finding should be interpreted with caution. Nonetheless, given the high  
22  
23 prevalence of PTSD in this group, future efforts should be made to obtain more  
24  
25 prevalence data on PTSD among MSM living with HIV.  
26  
27  
28  
29

30  
31 In our study, we assessed methodological differences that may result in  
32  
33 heterogeneity. Factors including sampling strategies (convenience vs consecutive) and  
34  
35 measurement (self-report vs clinical interview) were evaluated by subgroup analyses.  
36  
37 Among 38 studies providing estimated prevalence of PTSD, 7 reported participants  
38  
39 were consecutively enrolled via self-referral from flyers describing the study or  
40  
41 advertisements from HIV health care providers, and generated a lower pooled rate  
42  
43 (17%) compared with the other 20 studies using convenience sampling (32%), though  
44  
45 both sampling methods were non-probabilistic. An increase in reporting rate due to  
46  
47 convenience sampling has also been found in another meta-analysis synthesizing the  
48  
49 HCV seroconversion rates in MSM living with HIV.<sup>90</sup> Convenience samples may allow  
50  
51 researchers to select participants who are more likely to have PTSD symptoms and lead  
52  
53  
54  
55  
56  
57  
58  
59  
60

1  
2  
3  
4  
5 to over-estimation, but given that only 4 studies were rated as high quality and limited  
6  
7 description of study methods was detected in some studies, the reporting of  
8  
9 epidemiology may not be sufficient to draw conclusions. Therefore, the appropriateness  
10  
11 of calculating pooled prevalence estimates could be questioned, and the pooled  
12  
13 prevalence estimate regarding the varied recruitment approaches of the studies should  
14  
15 be interpreted with caution.  
16  
17  
18  
19

20  
21 In this review, a total of 14 different tools were used to assess PTSD symptoms  
22  
23 among PLWH across studies. Overall, the prevalence of PTSD screened by self-report  
24  
25 instruments (31%) was higher than that assessed by clinical interview (22%). Though  
26  
27 both measurements were in accordance with the diagnostic criteria (i.e. DSM or ICD),  
28  
29 clinical interviews most likely do a much better job of assessing symptoms carefully –  
30  
31 for example, not counting symptoms that do not meet clinically meaningful thresholds,  
32  
33 and self-report measures may inflate the prevalence estimates;<sup>91</sup> alternatively, subjects  
34  
35 may be more comfortable reporting symptoms using self-report questionnaires  
36  
37 (presumably paper or online surveys rather than face-to-face interviews). Screening or  
38  
39 diagnosing with survey instruments is a common and practical method, especially in  
40  
41 resource-limited regions. We found that, though a number of measures have been used  
42  
43 to assess PTSD among PLWH, there is no tool designed for this population specifically.  
44  
45 As the sensitivity and specificity of the measures may impact accurate PTSD detection,  
46  
47 further research is required to identify a standardized measure accordingly to improve  
48  
49 validity.  
50  
51  
52  
53  
54  
55  
56  
57  
58  
59  
60

1  
2  
3  
4  
5 Certain limitations should be acknowledged in this meta-analysis. First, though  
6  
7 minimal potential for publication bias was presumed as all data drawn for this review  
8  
9 were from studies reporting estimated point prevalence without intervention,  
10  
11 publication bias cannot be ruled out for there are a number of studies published in  
12  
13 languages other than English and Chinese that were not included in this review. Second,  
14  
15 the heterogeneity was high in the whole sample and most subgroups. Heterogeneity  
16  
17 importantly influences the reliability and accuracy of a meta-analysis, and the only  
18  
19 reliable method for acquiring correct inferences is careful selection of appropriate  
20  
21 studies.<sup>92</sup> Even though strict eligibility criteria were employed in addressing PTSD  
22  
23 prevalence in this study, it should be noted that getting HIV is only one possible  
24  
25 traumatic event, and therefore it is possible that the PTSD experienced by participants  
26  
27 in the selected studies was due to an event other than finding out they were HIV  
28  
29 positive. Accordingly, we suggests that further studies assessing PTSD among PLWH  
30  
31 include more detail on the specific traumas experienced by study participants. In  
32  
33 addition, we have analysed the influences of region, population group, recruitment  
34  
35 venue, and measurement method, which explained some of the heterogeneity. However,  
36  
37 the results should be interpreted with caution. Third, though some studies have  
38  
39 indicated that several sociodemographic factors such as age may be associated with  
40  
41 PTSD incidence among PLWH, we were unable to conduct subgroup analyses stratified  
42  
43 by age due to the lack of detailed information reported in the published studies. As the  
44  
45 quality of reporting could increase the susceptibility to bias, it is imperative for  
46  
47  
48  
49  
50  
51  
52  
53  
54  
55  
56  
57  
58  
59  
60

1  
2  
3  
4  
5 researchers to report their findings of observational studies in accordance with the  
6  
7 appropriate guidelines, such as the STROBE checklist.  
8  
9

## 10 **CONCLUSIONS**

11  
12 This review contributes to evidence on the quantitatively pooled prevalence of PTSD  
13 among PLWH. Stratified subgroups including geographic area, population group,  
14  
15 sampling and measurement method were found to be significant factors accounting for  
16  
17 the varied prevalence of PTSD among PLWH. More effective intervention strategies  
18  
19 targeting PTSD among PLWH are urgently needed. Future efforts should be made to  
20  
21 obtain countries' own PTSD prevalence data among PLWH as well as specific  
22  
23 vulnerable minorities, which will provide a basis for public health policy, health-care  
24  
25 planning, and resource allocation for PTSD intervention initiatives. Our study also  
26  
27 suggests that more research using robust and comprehensive methodology is needed to  
28  
29 provide rigorous evidence for designing the targeted psychological interventions.  
30  
31  
32  
33  
34  
35  
36  
37  
38  
39  
40

41 **Figure 1** Flow chart of study inclusion

42  
43 **Figure 2** Forest plot presenting the prevalence of PTSD in PLWH

44  
45 **Contributors:** Conception of the work: HW and CT. Systematic review and article  
46  
47 evaluation: CT, JM, XX and LZ. Data analysis: CT and XX. Results interpretation: CT,  
48  
49 LAG, HW and ABW. Drafting the article: CT, LAG, HW and ABW. Critical revision  
50  
51 of the manuscript: LAG, HW and ABW. Final approval of the manuscript: all the  
52  
53 authors. All the authors fulfill the ICMJE criteria for authorship.  
54  
55  
56  
57  
58  
59  
60

1  
2  
3  
4  
5 **Acknowledgements:** The authors would like to thank Dr. TIAN Hongping, Rory  
6  
7 Meyers College of Nursing, New York University-for assistance in this systematic  
8  
9 review.  
10  
11

12 **Funding:** This research received no specific grant from any funding body. CT is  
13 supported by the Scholarship from China Scholarship Council (CSC.201806370166).  
14  
15

16 **Data sharing statement:** No additional unpublished data are available from the study.  
17  
18

19 **Competing interests:** None declared.  
20  
21

## 22 23 24 25 26 REFERENCES

- 27  
28 1. UNAIDS. UNAIDS Data 2018.  
29  
30 <http://www.unaids.org/en/resources/documents/2018/unaids-data-2018> (Accessed  
31  
32 18 March 2019).  
33  
34  
35 2. Niu L, Luo D, Liu Y, *et al.* The mental health of people living with HIV in China,  
36  
37 1998–2014: a systematic review. *PLoS One*. 2016;11:e0153489.  
38  
39  
40 3. Adams C, Zacharia S, Masters L, *et al.* Mental health problems in people living with  
41  
42 HIV: changes in the last two decades: the London experience 1990–2014. *AIDS*  
43  
44 *care*. 2016;28:56–9.  
45  
46  
47 4. Friedman MJ, Resick PA, Bryant RA, *et al.* Considering PTSD for DSM-5.  
48  
49 *Depression and anxiety*. 2011;28:750–69.  
50  
51  
52 5. Young C. Understanding HIV-related posttraumatic stress disorder in South Africa:  
53  
54 a review and conceptual framework. *African Journal of AIDS Research*.  
55  
56  
57  
58  
59  
60

- 2011;10:139–48.
6. Sherr L, Nagra N, Kulubya G, *et al.* HIV infection associated post-traumatic stress disorder and post-traumatic growth—a systematic review. *Psychology, health & medicine.* 2011;16:612–29.
  7. Cavanaugh CE, Hansen NB, Sullivan TP. HIV sexual risk behavior among low-income women experiencing intimate partner violence: The role of posttraumatic stress disorder. *AIDS Behav.* 2010;14:318–27.
  8. Neigh GN, Rhodes ST, Valdez A, *et al.* PTSD co-morbid with HIV: Separate but equal, or two parts of a whole? *Neurobiology of disease.* 2016;92:116–23.
  9. Borwein A, Salters KA, Palmer AK, *et al.* High rates of lifetime and recent violence observed among harder-to-reach women living with HIV. *AIDS care.* 2014;26:587–94.
  10. Luo S, Lin C, Ji G, *et al.* Post-traumatic Stress Disorder Symptoms Among People Living with HIV/AIDS in Rural China. *AIDS Behav.* 2017;21:3202–8.
  11. Kessler RC. Posttraumatic stress disorder: the burden to the individual and to society. *The Journal of clinical psychiatry.* 2000;61(Suppl 5):4-14.
  12. Pence BW. The impact of mental health and traumatic life experiences on antiretroviral treatment outcomes for people living with HIV/AIDS. *Journal of Antimicrobial Chemotherapy.* 2009;63:636–40.
  13. Ebrahimzadeh Z, Goodarzi MA, Joulaei H. Predicting the Antiretroviral Medication Adherence and CD4 Measure in Patients with HIV/AIDS Based on the Post

- 1  
2  
3  
4  
5 Traumatic Stress Disorder and Depression. *Iranian Journal of Public Health*.  
6  
7 2019;48:139–46.  
8  
9
- 10 14. Julnes PS, Auh S, Krakora R, *et al*. The association between post-traumatic stress  
11 disorder and markers of inflammation and immune activation in HIV-infected  
12 individuals with controlled viremia. *Psychosomatics*. 2016;57:423–30.  
13  
14  
15 15. Lynn C, Chenneville T, Bradley-Klug K, *et al*. Depression, anxiety, and  
16 posttraumatic stress as predictors of immune functioning: differences between youth  
17 with behaviorally and perinatally acquired HIV. *AIDS care*. 2019 Mar 4:1–10.  
18  
19  
20 16. Brief DJ, Bollinger AR, Vielhauer MJ, *et al*. Understanding the interface of HIV,  
21 trauma, post-traumatic stress disorder, and substance use and its implications for  
22 health outcomes. *AIDS care*. 2004;16:97–120.  
23  
24  
25 17. Nightingale VR, Sher TG, Mattson M, *et al*. The effects of traumatic stressors and  
26 HIV-related trauma symptoms on health and health related quality of life. *AIDS*  
27 *Behav*. 2011;15:1870–8.  
28  
29  
30 18. Koegler E, Kennedy CE. A scoping review of the associations between mental  
31 health and factors related to HIV acquisition and disease progression in conflict-  
32 affected populations. *Confl Health*. 2018;12:20.  
33  
34  
35 19. Pearson CR, Kaysen D, Huh D, *et al*. Randomized Control Trial of Culturally  
36 Adapted Cognitive Processing Therapy for PTSD Substance Misuse and HIV  
37 Sexual Risk Behavior for Native American Women. *AIDS Behav*. 2019;23:695–706.  
38  
39  
40 20. Tull MT, Weiss NH, McDermott MJ. Post-traumatic stress disorder and impulsive  
41  
42  
43  
44  
45  
46  
47  
48  
49  
50  
51  
52  
53  
54  
55  
56  
57  
58  
59  
60



- 1  
2  
3  
4  
5 and risky behavior: Overview and discussion of potential mechanisms.  
6  
7  
8 *Comprehensive guide to post-traumatic stress disorders*. 2016;803–16.  
9
- 10 21. Weiss NH, Tull MT, Borne MER, *et al*. Posttraumatic stress disorder symptom  
11  
12 severity and HIV-risk behaviors among substance-dependent inpatients. *AIDS care*.  
13  
14 2013;25:1219–26.  
15  
16
- 17 22. Applebaum AJ, Bedoya CA, Hendriksen ES, *et al*. Future directions for  
18  
19 interventions targeting PTSD in HIV-infected adults. *Journal of the Association of*  
20  
21 *Nurses in AIDS Care*. 2015;26:127–38.  
22  
23  
24
- 25 23. Machtinger E, Wilson T, Haberer JE, *et al*. Psychological trauma and PTSD in HIV-  
26  
27 positive women: a meta-analysis. *AIDS Behav*. 2012;16:2091–100.  
28  
29
- 30 24. Gonzalez A, Locicero B, Mahaffey B, *et al*. Internalized HIV stigma and  
31  
32 mindfulness: associations with PTSD symptom severity in trauma-exposed adults  
33  
34 with HIV/AIDS. *Behavior modification*. 2016;40:144–63.  
35  
36  
37
- 38 25. Kemppainen JK, MacKain S, Alexander M, *et al*. Posttraumatic stress disorder and  
39  
40 stressful life events among rural women with HIV disease. *Journal of the*  
41  
42 *Association of Nurses in AIDS Care*. 2017;28:216–25.  
43  
44  
45
- 46 26. Rubin LH, Cook JA, Springer G, *et al*. Perceived and post-traumatic stress are  
47  
48 associated with decreased learning, memory, and fluency in HIV-infected women.  
49  
50 *AIDS (London, England)*. 2017;31:2393–1401.  
51  
52  
53
- 54 27. Seedat S. Interventions to improve psychological functioning and health outcomes  
55  
56 of HIV-infected individuals with a history of trauma or PTSD. *Current HIV/AIDS*  
57  
58  
59  
60

- 1  
2  
3  
4  
5 *Reports*. 2012;9:344–50.  
6  
7  
8 28. World Health Organization. The ICD-10 classification of mental and behavioural  
9  
10 disorders: clinical descriptions and diagnostic guidelines. Geneva: World Health  
11  
12 Organization; 1992.  
13  
14  
15 29. Association AP. Diagnostic and statistical manual of mental disorders. 5th Edition.  
16  
17 Washington, DC: American Psychiatric Pub; 2013.  
18  
19  
20 30. Sales JM, Swartzendruber A, Phillips AL. Trauma-Informed HIV Prevention and  
21  
22 Treatment. *Curr HIV/AIDS Rep*. 2016;13:374–82.  
23  
24  
25 31. Burnham KE, Cruess DG, Kalichman MO, *et al*. Trauma symptoms, internalized  
26  
27 stigma, social support, and sexual risk behavior among HIV-positive gay and  
28  
29 bisexual MSM who have sought sex partners online. *AIDS care*. 2016;28:347–53.  
30  
31  
32 32. Rzeszutek M, Oniszczenko W, Firląg-Burkacka E. Gender differences in  
33  
34 posttraumatic stress symptoms and social support in a sample of HIV-positive  
35  
36 individuals. *Women & health*. 2017;57:792–803.  
37  
38  
39 33. Rostom A, Dubé C, Cranney A, *et al*. Appendix D. Quality Assessment Forms.  
40  
41 Agency for Healthcare Research and Quality (US); 2004  
42  
43  
44 <https://www.ncbi.nlm.nih.gov/books/NBK35156/> (Accessed 21 October 2018).  
45  
46  
47  
48 34. Stata C, Station C. TX. Stata Press 2016  
49  
50  
51 35. Higgins JP, Thompson SG. Quantifying heterogeneity in a meta-analysis. *Statistics*  
52  
53 in medicine. 2002;21(11):1539-58.  
54  
55  
56 36. Egger M, Smith GD, Schneider M, *et al*. Bias in meta-analysis  
57  
58  
59  
60

- 1  
2  
3  
4  
5 detected by a simple, graphical test. *BMJ*. 1997; 315: 629–34.  
6  
7  
8 37. Begg CB, Mazumdar M. Operating characteristics of a rank correlation test for  
9  
10 publication bias. *Biometrics*. 1994; 50: 1088–101.  
11  
12  
13 38. Fabian KE, Huh D, Kemp CG, *et al*. Moderating Factors in an Anti-stigma  
14  
15 Intervention for African American Women with HIV in the United States: A  
16  
17 Secondary Analysis of the UNITY Trial. *AIDS and Behavior*. 2019;19:1-11.  
18  
19  
20 39. Chen CD, Yan H, Li SY, *et al*. Post-traumatic stress disorder and it associated  
21  
22 factors among people living with HIV in Wuhan city. *Chin J Public Health*. 2018;1-  
23  
24 4.  
25  
26  
27  
28 40. Spies G, Konkiewitz EC, Seedat S. Incidence and persistence of depression among  
29  
30 women living with and without HIV in South Africa: A longitudinal study. *AIDS*  
31  
32 *Behav*. 2018;22(10):3155–65.  
33  
34  
35  
36 41. Verhey R, Chibanda D, Gibson L, *et al*. Validation of the posttraumatic stress  
37  
38 disorder checklist - 5 (PCL-5) in a primary care population with high HIV  
39  
40 prevalence in Zimbabwe. *BMC Psychiatry*. 2018;18:109.  
41  
42  
43  
44 42. Gao M, Xiao C, Zhang X, *et al*. Social capital and PTSD among PLWHA in China:  
45  
46 the mediating role of resilience and internalized stigma. *Psychology, health &*  
47  
48 *medicine*. 2018;23:698–706.  
49  
50  
51  
52 43. McLean CP, Gay NG, Metzger DA, *et al*. Psychiatric Symptoms and Barriers to  
53  
54 Care in HIV-Infected Individuals Who Are Lost to Care. *J Int Assoc Provid AIDS*  
55  
56 *Care*. 2017;16:423–9.  
57  
58  
59  
60

- 1  
2  
3  
4  
5 44. Rubin LH, Pyra M, Cook JA, *et al.* Post-traumatic stress is associated with verbal  
6  
7 learning, memory, and psychomotor speed in HIV-infected and HIV-uninfected  
8  
9 women. *Journal of neurovirology*. 2016;22:159–69.  
10  
11  
12  
13 45. John M, Greene M, Hessel NA, *et al.* Geriatric assessments and association with  
14  
15 VACS index among HIV-infected older adults in San Francisco. *Journal of*  
16  
17 *acquired immune deficiency syndromes (1999)*. 2016;72:534.  
18  
19  
20  
21 46. Zhang X, Wang T, Liu M, *et al.* Post-traumatic stress disorder among people living  
22  
23 with HIV/AIDS and its influence factors. *Chongqing Medicine*. 2016;232–5.  
24  
25  
26 47. Battaglia TA, Gunn CM, McCoy ME, *et al.* Beliefs About Anal Cancer among HIV-  
27  
28 Infected Women: Barriers and Motivators to Participation in Research. *Womens*  
29  
30 *Health Issues*. 2015;25:720–6.  
31  
32  
33  
34 48. Hansrod F, Spies G, Seedat S. Type and severity of intimate partner violence and its  
35  
36 relationship with PTSD in HIV-infected women. *Psychology, health & medicine*.  
37  
38 2015;20:697–709.  
39  
40  
41 49. Brownley JR, Fallot RD, Berley RW, *et al.* Trauma history in African-American  
42  
43 women living with HIV: effects on psychiatric symptom severity and religious  
44  
45 coping. *AIDS care*. 2015;27:964–71.  
46  
47  
48  
49 50. Malee K, Mellins CA, Huo Y, *et al.* Prevalence, incidence and persistence of  
50  
51 psychiatric and substance use disorders among mothers living with HIV. *Journal of*  
52  
53 *acquired immune deficiency syndromes (1999)*. 2014;65:526.  
54  
55  
56  
57 51. Glémaud M, Illa L, Echenique M, *et al.* Abuse and mental health concerns among  
58  
59  
60

- 1  
2  
3  
4  
5 HIV-infected Haitian women living in the United States. *Journal of the Association*  
6  
7  
8 of Nurses in *AIDS Care*. 2014;25:S62–9.  
9
- 10 52. Gore-Felton C, Ginzburg K, Chartier M, *et al*. Attachment style and coping in  
11  
12  
13 relation to posttraumatic stress disorder symptoms among adults living with  
14  
15  
16 HIV/AIDS. *Journal of behavioral medicine*. 2013;36:51–60.  
17
- 18 53. Glover DA, Williams JK, Kisler KA. Using novel methods to examine stress among  
19  
20  
21 HIV-positive African American men who have sex with men and women. *J Behav*  
22  
23  
24 *Med*. 2013;36:283–94.  
25
- 26 54. Dévieux JG, Malow RM, Attonito JM, *et al*. Post-traumatic stress disorder  
27  
28  
29 symptomatology and alcohol use among HIV-seropositive adults in Haiti. *AIDS*  
30  
31  
32 *care*. 2013;25(10):1210-8.  
33
- 34 55. Gard TL, Hoover DR, Shi Q, *et al*. The impact of HIV status, HIV disease  
35  
36  
37 progression, and post-traumatic stress symptoms on the health-related quality of life  
38  
39  
40 of Rwandan women genocide survivors. *Quality of Life Research*. 2013;22(8):2073-  
41  
42  
43 84.  
44
- 45 56. Peterson K, Togun T, Klis S, *et al*. Depression and posttraumatic stress disorder  
46  
47  
48 among HIV-infected Gambians on antiretroviral therapy. *AIDS patient care and*  
49  
50  
51 *STDs*. 2012;26:589–96.  
52
- 53 57. Kinyanda E, Hoskins S, Nakku J, *et al*. Prevalence and risk factors of major  
54  
55  
56 depressive disorder in HIV/AIDS as seen in semi-urban Entebbe district, Uganda.  
57  
58  
59  
60 *BMC psychiatry*. 2011;11:205.

- 1  
2  
3  
4  
5 58. Bogart LM, Wagner GJ, Galvan FH, *et al.* Perceived discrimination and mental  
6  
7 health symptoms among Black men with HIV. *Cultural Diversity and Ethnic*  
8  
9 *Minority Psychology*. 2011;17:295.  
10  
11  
12  
13 59. Martin L, Kagee A. Lifetime and HIV-related PTSD among persons recently  
14  
15 diagnosed with HIV. *AIDS Behav*. 2011;15:125–31.  
16  
17  
18 60. Reisner SL, Falb KL, Mimiaga MJ. Early life traumatic stressors and the mediating  
19  
20 role of PTSD in incident HIV infection among US men, comparisons by sexual  
21  
22 orientation and race/ethnicity: results from the NESARC, 2004–2005. *Journal of*  
23  
24 *Acquired Immune Deficiency Syndromes*. 2011;57:340–50.  
25  
26  
27  
28 61. Theuninck AC, Lake N, Gibson S. HIV-related posttraumatic stress disorder:  
29  
30 Investigating the traumatic events. *AIDS Patient care and STDS*. 2010;24:485–91.  
31  
32  
33  
34 62. Joska JA, Fincham DS, Stein DJ, *et al.* Clinical correlates of HIV-associated  
35  
36 neurocognitive disorders in South Africa. *AIDS Behav*. 2010;14:371–8.  
37  
38  
39 63. Adewuya AO, Afolabi MO, Ola BA, *et al.* Post-traumatic stress disorder (PTSD)  
40  
41 after stigma related events in HIV infected individuals in Nigeria. *Social Psychiatry*  
42  
43 *and Psychiatric Epidemiology*. 2009;44:761.  
44  
45  
46  
47 64. Spies G, Kader K, Kidd M, *et al.* Validity of the K-10 in detecting DSM-IV-defined  
48  
49 depression and anxiety disorders among HIV-infected individuals. *AIDS care*.  
50  
51 2009;21:1163–8.  
52  
53  
54  
55 65. Fincham D, Smit J, Carey P, *et al.* The relationship between behavioural inhibition,  
56  
57 anxiety disorders, depression and CD4 counts in HIV-positive adults: a cross-  
58  
59  
60

- 1  
2  
3  
4  
5 sectional controlled study. *AIDS care*. 2008;20:1279–83.  
6  
7  
8 66. Zanjani F, Saboe K, Oslin D. Age difference in rates of mental health/substance  
9  
10 abuse and behavioral care in HIV-positive adults. *AIDS patient care and STDs*.  
11  
12 2007;21:347–55.  
13  
14  
15 67. Israelski DM, Prentiss DE, Lubega S, *et al*. Psychiatric co-morbidity in vulnerable  
16  
17 populations receiving primary care for HIV/AIDS. *AIDS care*. 2007;19:220–5.  
18  
19  
20 68. Boarts JM, Sledjeski EM, Bogart LM, *et al*. The differential impact of PTSD and  
21  
22 depression on HIV disease markers and adherence to HAART in people living with  
23  
24 HIV. *AIDS Behav*. 2006;10:253–61.  
25  
26  
27  
28 69. Leserman J, Whetten K, Lowe K, *et al*. How trauma, recent stressful events, and  
29  
30 PTSD affect functional health status and health utilization in HIV-infected patients  
31  
32 in the south. *Psychosomatic medicine*. 2005;67:500–7.  
33  
34  
35  
36 70. Olley BO, Gxamza F, Seedat S, *et al*. Psychopathology and coping in recently  
37  
38 diagnosed HIV/AIDS patients-the role of gender. *South African Medical Journal*.  
39  
40 2003;93:928–31.  
41  
42  
43  
44 71. Vitiello B, Burnam MA, Bing EG, *et al*. Use of psychotropic medications among  
45  
46 HIV-infected patients in the United States. *American Journal of Psychiatry*.  
47  
48 2003;160:547–54.  
49  
50  
51  
52 72. Martinez A, Israelski D, Walker C, *et al*. Posttraumatic stress disorder in women  
53  
54 attending human immunodeficiency virus outpatient clinics. *AIDS patient care and*  
55  
56 *STDs*. 2002;16:283–91.  
57  
58  
59  
60

- 1  
2  
3  
4  
5 73. Koenen KC, Ratanatharathorn A, Ng L, *et al.* Posttraumatic stress disorder in the  
6  
7  
8 World Mental Health Surveys. *Psychol Med.* 2017;47:2260–74.  
9
- 10 74. Abbey G, Thompson SBN, Hickish T, *et al.* A meta-analysis of prevalence rates and  
11  
12 moderating factors for cancer-related post-traumatic stress disorder.  
13  
14  
15 *Psychooncology.* 2015;24:371–81.  
16
- 17 75. Siqveland J, Hussain A, Lindstrøm JC, *et al.* Prevalence of Posttraumatic Stress  
18  
19 Disorder in Persons with Chronic Pain: A Meta-analysis. *Frontiers in Psychiatry.*  
20  
21  
22 2017;8:164.  
23  
24
- 25 76. Kelly B, Raphael B, Judd F, *et al.* Posttraumatic stress disorder in response to HIV  
26  
27 infection. *General Hospital Psychiatry.* 1998;20:345–52.  
28  
29
- 30 77. Bing EG, Burnam MA, Longshore D, *et al.* Psychiatric disorders and drug use  
31  
32 among human immunodeficiency virus–infected adults in the United States.  
33  
34  
35 *Archives of general psychiatry.* 2001;58:721–8.  
36  
37
- 38 78. Pringsheim T, Jette N, Frolkis A, *et al.* The prevalence of Parkinson’s disease: A  
39  
40 systematic review and meta-analysis. *Movement disorders.* 2014;29:1583–90.  
41  
42  
43
- 44 79. Wang T, Fu H, Kaminga AC, *et al.* Prevalence of depression or depressive  
45  
46 symptoms among people living with HIV/AIDS in China: a systematic review and  
47  
48 meta-analysis. *BMC psychiatry.* 2018 Dec;18(1):160.  
49  
50
- 51 80. Turan B, Budhwani H, Fazeli PL, *et al.* How Does Stigma Affect People Living  
52  
53 with HIV? The Mediating Roles of Internalized and Anticipated HIV Stigma in the  
54  
55 Effects of Perceived Community Stigma on Health and Psychosocial Outcomes.  
56  
57  
58  
59  
60



- 1  
2  
3  
4  
5 *AIDS Behav.* 2017;21:283–91.  
6  
7  
8 81. Kamen C, Vorasarun C, Canning T, *et al.* The impact of stigma and social support  
9  
10 on development of post-traumatic growth among persons living with HIV. *Journal*  
11  
12 *of clinical psychology in medical settings.* 2016;23:126–34.  
13  
14  
15 82. Lowther K, Selman L, Harding R, *et al.* Experience of persistent psychological  
16  
17 symptoms and perceived stigma among people with HIV on antiretroviral therapy  
18  
19 (ART): a systematic review. *International journal of nursing studies.*  
20  
21  
22 2014;51(8):1171-89.  
23  
24  
25 83. Li Z, Morano JP, Khoshnood K, *et al.* HIV-related stigma among people living with  
26  
27 HIV/AIDS in rural Central China. *BMC Health Serv Res.* 2018;18:453.  
28  
29  
30 84. Li L, Liang L-J, Lin C, *et al.* HIV prevention intervention to reduce HIV-related  
31  
32 stigma: evidence from China. *AIDS (London, England).* 2010;24:115.  
33  
34  
35 85. Shavitt S, Cho YI, Johnson TP, *et al.* Culture Moderates the Relation Between  
36  
37 Perceived Stress, Social Support, and Mental and Physical Health. *Journal of Cross-*  
38  
39 *Cultural Psychology.* 2016;47:956–80.  
40  
41  
42  
43 86. Lauber C, Rössler W. Stigma towards people with mental illness in developing  
44  
45 countries in Asia. *International Review of Psychiatry.* 2007;19:157–78.  
46  
47  
48  
49 87. Seeman N, Tang S, Brown AD, *et al.* World survey of mental illness stigma.  
50  
51  
52 *Journal of Affective Disorders.* 2016;190:115–21.  
53  
54  
55 88. Reisner SL, Mimiaga MJ, Safren SA, *et al.* Stressful or traumatic life events, post-  
56  
57 traumatic stress disorder (PTSD) symptoms, and HIV sexual risk taking among men  
58  
59  
60

- 1  
2  
3  
4  
5 who have sex with men. *AIDS care*. 2009;21:1481–9.  
6  
7  
8 89. Luo Z, Feng T, Fu H, *et al*. Lifetime prevalence of suicidal ideation among men  
9  
10 who have sex with men: a meta-analysis. *BMC psychiatry*. 2017;17:406.  
11  
12  
13 90. Hagan H, Jordan AE, Neurer J, *et al*. Incidence of sexually transmitted hepatitis C  
14  
15 virus infection in HIV-positive men who have sex with men. *AIDS*. 2015;29:2335–  
16  
17 45.  
18  
19  
20 91. Ayers S, Wright DB, Ford E. Hyperarousal symptoms after traumatic and  
21  
22 nontraumatic births. *Journal of Reproductive and Infant Psychology*. 2015;33:282–  
23  
24 93.  
25  
26  
27  
28 92. Melsen WG, Bootsma MC, Rovers MM, *et al*. The effects of clinical and statistical  
29  
30 heterogeneity on the predictive values of results from meta-analyses. *Clinical*  
31  
32 *Microbiology and Infection*. 2014;20(2):123-9.  
33  
34  
35  
36  
37  
38  
39  
40  
41  
42  
43  
44  
45  
46  
47  
48  
49  
50  
51  
52  
53  
54  
55  
56  
57  
58  
59  
60

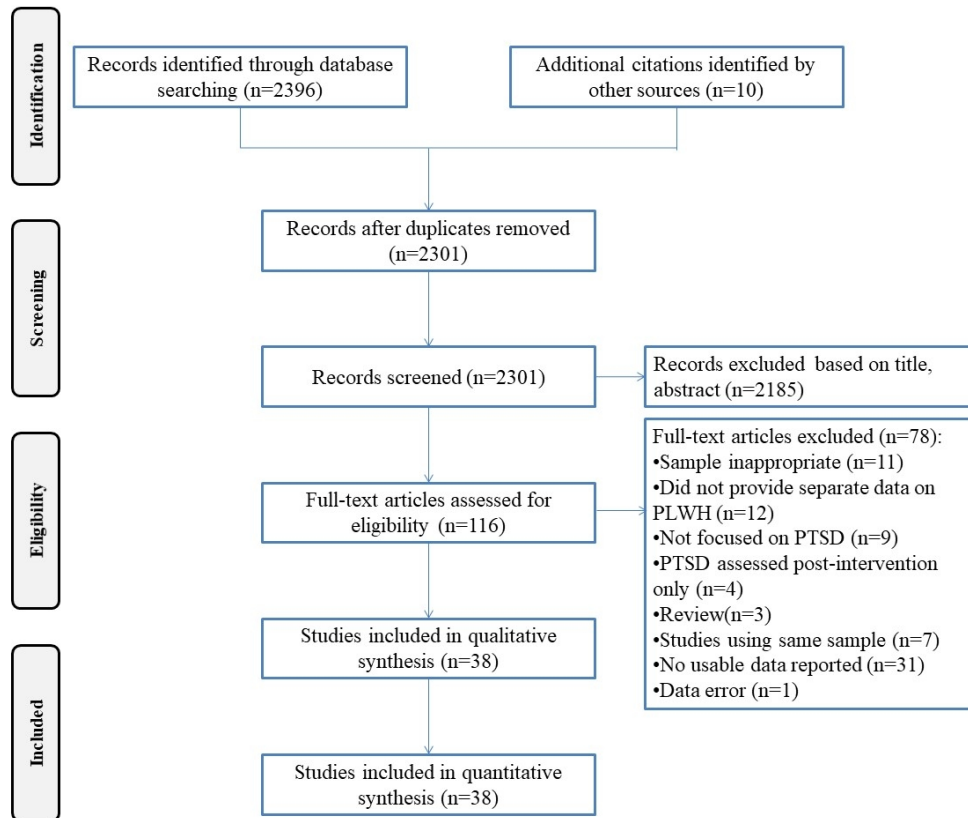

Figure 1 Flow chart of study inclusion

300x250mm (96 x 96 DPI)



Figure 2 Forest plot presenting the prevalence of PTSD in PLWH

281x304mm (300 x 300 DPI)

## Appendix 1 – Search strategy

| ID     | Search terms                                                                                                                                                                                                                                                                                                                                                                                                                                                                                                                                                                                                                    |
|--------|---------------------------------------------------------------------------------------------------------------------------------------------------------------------------------------------------------------------------------------------------------------------------------------------------------------------------------------------------------------------------------------------------------------------------------------------------------------------------------------------------------------------------------------------------------------------------------------------------------------------------------|
| PubMed |                                                                                                                                                                                                                                                                                                                                                                                                                                                                                                                                                                                                                                 |
| #1     | ("stress disorders, post-traumatic"[Mesh] OR PTSD*[tiab] OR posttrauma*[tiab] OR "post trauma*" [tiab]OR post-trauma*[tiab] OR trauma* [tiab] OR psychotrauma*[tiab] OR stress*[tiab])                                                                                                                                                                                                                                                                                                                                                                                                                                          |
| #2     | ("HIV Infections"[Mesh] OR "HIV" [MeSH] OR "human immunodeficiency virus" [tiab] OR "human immuno deficiency virus" [tiab] OR "human immune deficiency virus" [tiab] OR "human immunodeficiency virus" [tiab] OR "AIDS" [tiab] OR "acquired immunodeficiency syndrome" [tiab] OR "acquired immunodeficiency syndromes" [tiab] OR "acquired immuno deficiency syndrome" [tiab] OR "acquired immuno deficiency syndromes" [tiab] OR "acquired immune deficiency syndrome" [tiab] OR "acquired immune deficiency syndromes" [tiab] OR "acquired immunodeficiency syndrome" [tiab] OR "acquired immunodeficiency syndromes" [tiab]) |
| #3     | ((((((("Prevalence"[Mesh] OR "Epidemiology"[Mesh] OR "Cross-Sectional Studies"[Mesh])) OR Prevalence) OR Epidemiology) OR Cross-Sectional Studies) OR "Longitudinal Studies"[Mesh]) OR "Cohort Studies"[Mesh]) OR Cohort Studies) OR Longitudinal Studies))                                                                                                                                                                                                                                                                                                                                                                     |
| #4     | #1 AND #2 AND #3                                                                                                                                                                                                                                                                                                                                                                                                                                                                                                                                                                                                                |

### Search Filters

- a. Human studies
- b. Language – English/Chinese
- c. Publication dates – From 2000/01/01 to 2019/11/31

## Appendix 2 – Risk of bias and quality of included studies

| Country      | Year | Citation        | 1   | 2   | 3   | 4       | 5       | 6   | 7   | 8   | 9   | 10  | 11  | Quality  |
|--------------|------|-----------------|-----|-----|-----|---------|---------|-----|-----|-----|-----|-----|-----|----------|
| USA          | 2019 | Fabian 2019     | yes | yes | no  | unclear | unclear | no  | no  | yes | no  | yes | yes | moderate |
| China        | 2018 | Cheng 2018      | yes | yes | yes | unclear | unclear | yes | no  | no  | no  | no  | no  | moderate |
| South Africa | 2018 | Spies 2018      | yes | yes | no  | no      | unclear | yes | no  | yes | no  | no  | no  | moderate |
| Zimbabwe     | 2018 | Verhey 2018     | yes | yes | yes | no      | unclear | yes | yes | no  | no  | yes | no  | moderate |
| China        | 2018 | Gao 2018        | yes | yes | yes | no      | unclear | no  | no  | yes | no  | no  | no  | moderate |
| USA          | 2017 | McLean 2017     | yes | yes | yes | no      | unclear | yes | yes | yes | no  | yes | no  | moderate |
| USA          | 2017 | Kemppainen 2017 | yes | yes | no  | no      | unclear | no  | no  | no  | no  | no  | no  | low      |
| USA          | 2016 | Gonzalez 2016   | yes | yes | yes | no      | unclear | yes | yes | yes | no  | yes | no  | moderate |
| USA          | 2016 | Rubin 2016      | yes | yes | yes | no      | no      | no  | yes | yes | yes | yes | no  | moderate |
| USA          | 2016 | John 2016       | yes | no  | yes | yes     | no      | yes | no  | no  | no  | no  | no  | moderate |
| USA          | 2016 | Julnes 2016     | yes | yes | yes | no      | unclear | no  | yes | yes | no  | no  | no  | moderate |
| China        | 2016 | Zhang 2016      | yes | yes | no  | no      | no      | no  | no  | no  | no  | yes | no  | low      |
| USA          | 2015 | Battaglia 2015  | yes | yes | yes | no      | unclear | no  | no  | no  | no  | yes | no  | moderate |
| South Africa | 2015 | Hansrod 2015    | yes | yes | yes | no      | unclear | yes | no  | yes | no  | no  | no  | moderate |
| USA          | 2015 | Brownley 2015   | yes | yes | yes | unclear | unclear | no  | no  | no  | no  | yes | no  | moderate |
| USA          | 2014 | Malee 2014      | yes | yes | yes | no      | unclear | no  | yes | yes | yes | yes | yes | high     |
| USA          | 2014 | Glémaud 2014    | yes | yes | yes | unclear | unclear | no  | no  | no  | no  | no  | no  | low      |

1  
2  
3  
4  
5  
6  
7  
8  
9  
10  
11  
12  
13  
14  
15  
16  
17  
18  
19  
20  
21  
22  
23  
24  
25  
26  
27  
28  
29  
30  
31  
32  
33  
34  
35  
36  
37  
38  
39  
40  
41  
42  
43  
44  
45  
46  
47

|              |      |                  |     |     |     |         |         |     |     |     |     |     |     |          |
|--------------|------|------------------|-----|-----|-----|---------|---------|-----|-----|-----|-----|-----|-----|----------|
| USA          | 2013 | Gore-Felton 2013 | yes | yes | no  | no      | unclear | yes | no  | no  | no  | no  | no  | low      |
| USA          | 2013 | Glover 2013      | yes | yes | no  | unclear | unclear | yes | yes | yes | yes | yes | yes | high     |
| Haiti        | 2013 | Dévioux 2013     | yes | yes | yes | no      | unclear | no  | no  | yes | no  | no  | no  | moderate |
| Rwanda       | 2013 | Gard 2013        | yes | yes | yes | unclear | no      | no  | yes | yes | no  | yes | no  | moderate |
| Gambia       | 2012 | Peterson 2012    | yes | yes | yes | yes     | yes     | no  | yes | yes | yes | yes | no  | high     |
| Uganda       | 2011 | Kinyanda 2011    | yes | yes | yes | yes     | unclear | no  | yes | yes | no  | yes | no  | moderate |
| USA          | 2011 | Bogart 2011      | yes | yes | yes | no      | unclear | no  | yes | yes | no  | no  | no  | moderate |
| UK           | 2011 | Martin 2011      | yes | yes | yes | no      | unclear | no  | no  | no  | no  | yes | no  | moderate |
| USA          | 2011 | Reisner 2011     | yes | yes | yes | no      | unclear | no  | yes | yes | yes | no  | no  | moderate |
| UK           | 2010 | Theunink 2010    | yes | no  | no  | no      | no      | no  | no  | no  | no  | no  | no  | low      |
| South Africa | 2010 | Joska 2010       | yes | yes | no  | unclear | unclear | yes | no  | yes | yes | no  | no  | moderate |
| Nigeria      | 2009 | Adewuya 2009     | yes | yes | no  | no      | unclear | no  | no  | yes | no  | yes | no  | moderate |
| South Africa | 2009 | Spies 2009       | yes | yes | no  | no      | unclear | yes | no  | yes | no  | yes | no  | moderate |
| South Africa | 2008 | Fincham 2008     | yes | yes | yes | yes     | unclear | no  | yes | yes | yes | no  | no  | moderate |
| USA          | 2007 | Zanjani 2007     | yes | yes | yes | no      | unclear | no  | no  | yes | yes | no  | no  | moderate |
| USA          | 2007 | Israelski 2007   | yes | yes | yes | unclear | unclear | no  | no  | no  | no  | no  | no  | low      |
| USA          | 2006 | Boarts 2006      | yes | no  | no  | no      | unclear | yes | yes | yes | no  | no  | yes | moderate |
| USA          | 2005 | Leserman 2005    | yes | yes | no  | yes     | no      | no  | yes | yes | yes | yes | no  | high     |
| South Africa | 2003 | Olley 2003       | yes | yes | no  | yes     | unclear | no  | no  | yes | no  | no  | no  | moderate |

|     |      |                  |     |     |    |     |         |    |     |    |    |     |     |          |
|-----|------|------------------|-----|-----|----|-----|---------|----|-----|----|----|-----|-----|----------|
| USA | 2003 | Vitiello<br>2003 | yes | no  | no | no  | unclear | no | yes | no | no | yes | yes | moderate |
| USA | 2002 | Martinez<br>2002 | yes | yes | no | yes | unclear | no | yes | no | no | yes | no  | moderate |

Risk of bias was assessed using the Agency for Healthcare Research and Quality (AHRQ). The checklist included 11 items. Each item was coded with a “yeses/No/Unclear”: “No” or “Unclear” was scored “0”, and “yeses” was scored “1”. Total score out of 11 where 8-11, 4-7, and 0-3 depict high, moderate and low quality, respectively.



# MOOSE Checklist

| Items                                                                                                                                                                                                                                                           | Page #     | Comments       |
|-----------------------------------------------------------------------------------------------------------------------------------------------------------------------------------------------------------------------------------------------------------------|------------|----------------|
| <b>TITLE</b> Identify the study as a meta-analysis (or systematic review)                                                                                                                                                                                       | 3          |                |
| <b>ABSTRACT</b> Use the journal's structured format                                                                                                                                                                                                             | 3,4        |                |
| <b>INTRODUCTION</b>                                                                                                                                                                                                                                             |            |                |
| · The clinical problem                                                                                                                                                                                                                                          | 5,6        |                |
| · The hypothesis                                                                                                                                                                                                                                                | 5          |                |
| · A statement of objectives that includes the study population, the condition of interest, the exposure or intervention, and the outcome(s) considered                                                                                                          | 7          |                |
| <b>SOURCES</b>                                                                                                                                                                                                                                                  |            |                |
| · Qualifications of searchers (eg, librarians and investigators)                                                                                                                                                                                                | 8          | 1 psychiatrist |
| · Search strategy, including time period included in the synthesis and keywords                                                                                                                                                                                 | 7,8        |                |
| · Effort to include all available studies, including contact with authors                                                                                                                                                                                       | 8          |                |
| · Databases and registries searched                                                                                                                                                                                                                             | 7          |                |
| · Search software used, name and version, including special features used (eg, explosion)                                                                                                                                                                       | -          |                |
| · Use of hand searching (eg, reference lists of obtained articles)                                                                                                                                                                                              | 8          |                |
| · List of citations located and those excluded, including justification                                                                                                                                                                                         | figure 1   |                |
| · Method of addressing articles published in languages other than English                                                                                                                                                                                       | 7          |                |
| · Method of handling abstracts and unpublished studies                                                                                                                                                                                                          | -          | Not applicable |
| · Description of any contact with authors                                                                                                                                                                                                                       | -          |                |
| <b>STUDY SELECTION</b>                                                                                                                                                                                                                                          |            |                |
| · Types of study designs considered                                                                                                                                                                                                                             | 8          | Observational  |
| · Relevance or appropriateness of studies gathered for assessing the hypothesis to be tested                                                                                                                                                                    | 7,8        |                |
| · Rationale for the selection and coding of data (eg, sound clinical principles or convenience)                                                                                                                                                                 | 7,8        |                |
| · Documentation of how data were classified and coded (eg, multiple raters, blinding, etc)                                                                                                                                                                      | 8,9        |                |
| · Assessment of confounding (eg, comparability of cases and controls in studies where appropriate)                                                                                                                                                              | -          | Not applicable |
| · Assessment of study quality, including blinding of quality assessors; stratification or regression on possible predictors of study results                                                                                                                    | 9,10       |                |
| · Assessment of heterogeneity                                                                                                                                                                                                                                   | 10         |                |
| · Statistical methods (eg, complete description of fixed or random effects models, justification of whether the chosen models account for predictors of study results, dose-response models, or cumulative meta-analysis) in sufficient detail to be replicated | 10         |                |
| <b>RESULTS</b>                                                                                                                                                                                                                                                  |            |                |
| · A graph summarizing individual study estimates and the overall estimate                                                                                                                                                                                       | Figure 1,2 |                |
| · A table giving descriptive information for each included study                                                                                                                                                                                                | Tables 1   |                |
| · Results of sensitivity testing (eg, subgroup analysis)                                                                                                                                                                                                        | 17,18      |                |
| · Indication of statistical uncertainty of findings                                                                                                                                                                                                             | 17         |                |
| <b>DISCUSSION</b>                                                                                                                                                                                                                                               |            |                |
| · Strengths and weaknesses                                                                                                                                                                                                                                      | 22-27      |                |
| · Potential biases in the review process (eg, publication bias)                                                                                                                                                                                                 | 27         |                |
| · Justification for exclusion (eg, exclusion of non-English-language citations)                                                                                                                                                                                 | -          |                |
| · Assessment of quality of included studies                                                                                                                                                                                                                     | 26         |                |
| · Consideration of alternative explanations for observed results                                                                                                                                                                                                | 27         |                |
| · Generalization of the conclusions (ie, appropriate for the data presented and within the domain of the literature review)                                                                                                                                     | 28         |                |
| · Guidelines for future research                                                                                                                                                                                                                                | 27,28      |                |
| · Disclosure of funding source                                                                                                                                                                                                                                  | 29         |                |

# BMJ Open

## A global estimate of the prevalence of posttraumatic stress disorder among adults living with HIV: A systematic review and meta-analysis

|                                 |                                                                                                                                                                                                                                                                                                             |
|---------------------------------|-------------------------------------------------------------------------------------------------------------------------------------------------------------------------------------------------------------------------------------------------------------------------------------------------------------|
| Journal:                        | <i>BMJ Open</i>                                                                                                                                                                                                                                                                                             |
| Manuscript ID                   | bmjopen-2019-032435.R3                                                                                                                                                                                                                                                                                      |
| Article Type:                   | Original research                                                                                                                                                                                                                                                                                           |
| Date Submitted by the Author:   | 29-Feb-2020                                                                                                                                                                                                                                                                                                 |
| Complete List of Authors:       | TANG, chulei; Central South University Xiangya School of Nursing, Goldsamt, Lloyd; NYU College of Nursing, Meng, Jingjing; Central South University Xiao, Xueling; Central South University Zhang, Li; Central South University Williams, Ann; New York University Wang, Honghong; Central South University |
| <b>Primary Subject Heading</b>: | Global health                                                                                                                                                                                                                                                                                               |
| Secondary Subject Heading:      | Epidemiology, Mental health, HIV/AIDS                                                                                                                                                                                                                                                                       |
| Keywords:                       | Posttraumatic stress disorder, HIV/AIDS, Prevalence, Meta-analysis                                                                                                                                                                                                                                          |
|                                 |                                                                                                                                                                                                                                                                                                             |

SCHOLARONE™  
Manuscripts



I, the Submitting Author has the right to grant and does grant on behalf of all authors of the Work (as defined in the below author licence), an exclusive licence and/or a non-exclusive licence for contributions from authors who are: i) UK Crown employees; ii) where BMJ has agreed a CC-BY licence shall apply, and/or iii) in accordance with the terms applicable for US Federal Government officers or employees acting as part of their official duties; on a worldwide, perpetual, irrevocable, royalty-free basis to BMJ Publishing Group Ltd ("BMJ") its licensees and where the relevant Journal is co-owned by BMJ to the co-owners of the Journal, to publish the Work in this journal and any other BMJ products and to exploit all rights, as set out in our [licence](#).

The Submitting Author accepts and understands that any supply made under these terms is made by BMJ to the Submitting Author unless you are acting as an employee on behalf of your employer or a postgraduate student of an affiliated institution which is paying any applicable article publishing charge ("APC") for Open Access articles. Where the Submitting Author wishes to make the Work available on an Open Access basis (and intends to pay the relevant APC), the terms of reuse of such Open Access shall be governed by a Creative Commons licence – details of these licences and which [Creative Commons](#) licence will apply to this Work are set out in our licence referred to above.

Other than as permitted in any relevant BMJ Author's Self Archiving Policies, I confirm this Work has not been accepted for publication elsewhere, is not being considered for publication elsewhere and does not duplicate material already published. I confirm all authors consent to publication of this Work and authorise the granting of this licence.

**TITLE PAGE**

**Title:** A global estimate of the prevalence of posttraumatic stress disorder among adults living with HIV: A systematic review and meta-analysis

**Running head:** Posttraumatic stress disorder, HIV, Prevalence, Meta-analysis

**Authors:**

1. Chulei TANG, BSN, RN

Xiangya School of Nursing, Central South University, Changsha, China

ORCID: 0000-0003-3178-5130

2. Lloyd A Goldsamt, PhD, Senior Research Scientist

Rory Meyers College of Nursing, New York University, 433 First Avenue, New York 10013, USA

3. Jingjing MENG, BSN, RN

Xiangya School of Nursing, Central South University, Changsha, China

4. Xueling XIAO, MSN, RN

Xiangya School of Nursing, Central South University, Changsha, China

5. Li ZHANG, MSN, RN

Xiangya School of Nursing, Central South University, Changsha, China

6. Ann Bartley Williams, PhD, Professor

Rory Meyers College of Nursing, New York University, 433 First Avenue, New York 10013, USA

7. Honghong WANG, RN, MSN, PhD, Professor

Xiangya School of Nursing, Central South University, Changsha, China.

1  
2  
3  
4 **Corresponding author**  
5

6 Honghong WANG  
7

8 Xiangya School of Nursing, Central South University  
9

10 172 Tongzipo road, Changsha 410013, Hunan, China  
11

12  
13 Email: honghong\_wang@hotmail.com  
14

15 Telephone number: 0731-82650270  
16

17 Fax number: 0731-82650270  
18  
19

20  
21 **Keywords** Posttraumatic stress disorder, HIV/AIDS, Prevalence, Meta-analysis  
22

23 **Word count: 3674 words**  
24  
25  
26  
27  
28  
29  
30  
31  
32  
33  
34  
35  
36  
37  
38  
39  
40  
41  
42  
43  
44  
45  
46  
47  
48  
49  
50  
51  
52  
53  
54  
55  
56  
57  
58  
59  
60

1  
2  
3  
4  
5 **A global estimate of the prevalence of posttraumatic stress disorder among adults**  
6  
7 **living with HIV: A systematic review and meta-analysis**  
8  
9

10  
11  
12  
13 **ABSTRACT**  
14

15 **Objectives** Although people living with HIV (PLWH) have been disproportionately  
16 affected by posttraumatic stress disorder (PTSD), the global prevalence of PTSD among  
17 PLWH is unknown. This study aimed to systematically review the prevalence of PTSD  
18 among PLWH worldwide and explore variation in prevalence across sociodemographic  
19 and methodological factors.  
20  
21  
22  
23  
24  
25  
26  
27

28 **Design** A meta-analysis using a random-effect model was conducted to pool the  
29 prevalence estimated from individual studies, and subgroup analyses were used to  
30 analyse heterogeneities.  
31  
32  
33  
34  
35

36 **Setting, participants and measures** Observational studies providing PTSD prevalence  
37 data in an adult HIV population were searched from January 2000 to November 2019.  
38  
39 Measurements were not restricted, although the definition of PTSD had to align with the  
40 Diagnostic and Statistical Manual of Mental Disorders (DSM) or the International  
41 Classification of Diseases (ICD) diagnostic criteria.  
42  
43  
44  
45  
46  
47  
48

49 **Results** A total of 38 articles were included among 2406 records identified initially. The  
50 estimated global prevalence of PTSD in PLWH was 28% (95% CI 24-33%). Significant  
51 heterogeneity was detected in the proportion of PLWH who reported PTSD across  
52 studies, which was partially explained by geographic area, population group,  
53  
54  
55  
56  
57  
58  
59  
60

1  
2  
3  
4  
5 measurement and sampling method ( $p<0.05$ ).  
6

7 **Conclusion** PTSD among PLWH is common worldwide. This review highlights that  
8 PTSD should be routinely screened for and that more effective prevention strategies and  
9  
10 PTSD should be routinely screened for and that more effective prevention strategies and  
11  
12 treatment packages targeting PTSD are needed in PLWH.  
13  
14  
15

### 16 17 18 **Strengths and limitations of this study** 19

- 20 ● This is the first meta-analysis providing comprehensive assessment on the  
21 prevalence of posttraumatic stress disorder (PTSD) among adults living with HIV.  
22  
23
- 24 ● Several subgroup analyses were conducted to examine the influence of diverse  
25 sociodemographic backgrounds as well as methodological heterogeneity.  
26  
27
- 28 ● This review was conducted with specific definitions of PTSD as part of the  
29 inclusion criteria to help in acquiring high level of evidence, which also limited the  
30 number of eligible studies.  
31  
32
- 33 ● A lack of studies carried out on the topic in low-income and middle-income  
34 countries could underestimate the burden of HIV-PTSD prevalence of the world.  
35  
36
- 37 ● We did not undertake a search of grey literature, restricting our sample to articles  
38 published in peer-reviewed journals.  
39  
40  
41  
42  
43  
44  
45  
46  
47  
48  
49  
50  
51  
52  
53  
54  
55  
56  
57  
58  
59  
60

## INTRODUCTION

Globally, there were more than 36 million people living with HIV (PLWH) by the end of 2017.<sup>1</sup> Although increasingly expanded access to antiretroviral therapy (ART) has led to a prolonged life span, a large portion of PLWH still suffer a significant burden due to psychiatric disorders.<sup>2,3</sup> Posttraumatic stress disorder (PTSD) is a mental health condition following exposure to a life-threatening event, or extreme or repeated exposure to traumatic events.<sup>4</sup> A growing body of literature indicates that PLWH have a heightened risk for PTSD.<sup>5-6</sup> PLWH are more likely to report a history of traumatic and stressful life experiences than the general population, including childhood sexual/physical abuse and intimate partner violence.<sup>7-9</sup> PTSD may precede an HIV-positive diagnosis due to previous traumatic experiences. In addition, being diagnosed with HIV, a life-threatening illness, is a potentially traumatic event in and of itself, and PTSD may emerge as a result of this diagnosis. Infection with HIV not only causes a progressive destruction of the immune system, which increases the susceptibility to malignancies that threaten a person's life, but being labeled and associated with HIV stigma, taking multiple daily medications and experiencing repeated unpleasant side effects also constitute potentially traumatic events.<sup>10</sup> These high rates of potential trauma exposure during the course of the illness may also increase the likelihood of developing PTSD.

Generally, the concept of PTSD has been broadly applied to military veterans, survivors of disasters and accidents, and victims of violent assaults. PTSD as a serious



1  
2  
3  
4  
5 and costly health problem in the general population is well recognized, and not only  
6  
7  
8 impairs a person's physical health, but also greatly influences social functioning.<sup>11</sup> The  
9  
10  
11 co-occurrence of PTSD and HIV-infection creates even more challenges regarding both  
12  
13 the treatment of PTSD and the management of HIV. PTSD can negatively impact  
14  
15 medication adherence and impair immune functioning,<sup>12-15</sup> both of which are especially  
16  
17  
18 critical for PLWH. PLWH with PTSD have been found to be at increased risk of  
19  
20  
21 somatization and physical disorders.<sup>16</sup> The illness experience of PTSD, such as  
22  
23  
24 persistent avoidance and re-experiencing the traumatic event, may also compromise  
25  
26  
27 quality of life and cause significant distress in PLWH.<sup>7 17</sup> Subsequently, prolonged and  
28  
29  
30 untreated PTSD may lead to exacerbation of PTSD as well as HIV progression.<sup>18</sup> There  
31  
32  
33 is also evidence suggesting that reductions in PTSD symptom severity are related to  
34  
35  
36 improved HIV-risk related outcomes.<sup>19</sup> Given that PTSD elevates HIV-risk behaviors<sup>20</sup>  
37  
38  
39 <sup>21</sup> and the possibility of HIV transmission also increases along with disease progression,  
40  
41  
42 PLWH suffering from PTSD are an important group to understand and with whom to  
43  
44  
45 intervene.

46  
47  
48 Valid data on PTSD prevalence among PLWH is essential. Evidence on the extent  
49  
50  
51 of PTSD among PLWH is needed to raise awareness and recommend clinical  
52  
53  
54 management. Although a number of studies have investigated the prevalence of PTSD  
55  
56  
57 in PLWH, findings have been inconsistent.<sup>22</sup> While studies have reported varied  
58  
59  
60 incidence, few efforts have been made to aggregate existing research using meta-  
analysis techniques. There was one published meta-analysis estimating the pooled

1  
2  
3  
4  
5 prevalence of PTSD among women living with HIV in 2012.<sup>23</sup> But the lack of studies  
6  
7  
8 with other groups lowered the generalizability and global relevance of their findings.  
9  
10 Moreover, the meta-analysis was conducted in 2012, and the increase of publications  
11  
12 about PTSD among PLWH since then<sup>24-26</sup> suggests that a timely update is urgently  
13  
14  
15 needed. Indeed, several reviews provide a useful overview of the possible prevalence of  
16  
17 PTSD among PLWH;<sup>22-27</sup> however, a number of gaps remain. First, to date, there has  
18  
19  
20 been no attempt to achieve a better understanding of the epidemiology of PTSD in  
21  
22  
23 PLWH and the reviews did not aim at an overall PTSD prevalence specifically. Second,  
24  
25 economically and politically, while precise estimates of prevalence can support efficient  
26  
27 allocation of resources, factors that might influence PTSD prevalence, such as  
28  
29  
30 population characteristics and socio-cultural context have been neglected.  
31  
32

33  
34 Therefore, to fill these knowledge gaps, we aimed to provide an estimate for the  
35  
36 worldwide prevalence of PTSD in PLWH and to test whether PTSD prevalence in  
37  
38  
39 PLWH differs based between population groups, country income groups and study  
40  
41 characteristics. This information can then be used to inform further practice and  
42  
43  
44 research for this highly co-morbid group.  
45

## 46 **METHODS**

### 47 **Search strategy**

48  
49 Systematic searches were conducted through 5 electronic English databases (Medline,  
50  
51  
52 Web of Science, CINAHL, EMBASE and Cochrane Library) and 3 Chinese databases  
53  
54  
55 (CNKI, Wanfang Database, Sinomed) to identify published studies on PTSD prevalence  
56  
57  
58  
59  
60

1  
2  
3  
4  
5 among PLWH from January 2000 to November 2019. The search terms were:  
6  
7 posttrauma\*, post trauma\*, post-trauma\*, stress disorder\*, OR PTSD; AND HIV,  
8  
9 acquired immunodeficiency syndrome, AIDS, OR PLWH\$; AND epidemiology,  
10  
11 occurrence, incidence, OR prevalence (see online supplementary appendix 1 for the  
12  
13 precise search strategy). The reference lists of review articles and retrieved full-text  
14  
15 articles were also examined for additional papers that were eligible for this review.  
16  
17  
18  
19

### 20 21 **Eligibility criteria**

22  
23 Studies were included for this meta-analysis if they met the following predetermined  
24  
25 selection criteria: (1) published in Chinese or English in a peer reviewed journal; (2)  
26  
27 observational study where prevalence figures for PTSD were stated or can be calculated  
28  
29 in an adult HIV population; and (3) underlined that PTSD cases were identified in  
30  
31 accordance with the Diagnostic and Statistical Manual of Mental Disorders (DSM) or  
32  
33 the International Classification of Diseases (ICD) diagnostic criteria.<sup>28 29</sup> Studies were  
34  
35 excluded if (1) they only recruited those who had mental distress; (2) they specifically  
36  
37 targeted only youth under 18 or children affected by HIV. No restriction was applied  
38  
39 regarding gender, nationality, or sexual orientation. Additionally, articles were reviewed  
40  
41 closely, and if repeated data were observed, only the earlier publication with one set of  
42  
43 complete data was included.  
44  
45  
46  
47  
48  
49

### 50 51 **Data extraction and analysis**

52  
53 Screening of papers was carried out by three of the authors (C.T., J.M. and X.X.)  
54  
55 following PRISMA recommendations. C.T and X.X. searched the English papers and  
56  
57  
58  
59  
60

1  
2  
3  
4  
5 J.M. screened the Chinese language papers. After duplicates were deleted, each  
6  
7  
8 investigator read titles and abstracts closely to capture all potential studies. Full-text  
9  
10  
11 articles were obtained and reviewed for all criteria. Any discrepancies were resolved by  
12  
13 discussion with the research team. The PRISMA flow chart shows the results of the  
14  
15 systematic search (figure 1)  
16

### 17 **Data extraction**

18  
19  
20 Two authors (C.T. and X.X.) used a data extraction sheet to capture the following data  
21  
22  
23 independently from included papers: first author, year of publication, country of study,  
24  
25  
26 sampling method, sample size, number of patients with PTSD, measurements and  
27  
28  
29 outcome data. The third investigator (H.W.) helped to verify all extracted data and  
30  
31  
32 resolve any uncertainties. To facilitate detection of sample/methodological  
33  
34  
35 heterogeneity, countries were categorized according to their income level, and  
36  
37  
38 measurements were classified into diagnostic questionnaire and clinical interview based  
39  
40  
41 on the approach to diagnosing PTSD. To minimize selection bias, we reviewed the  
42  
43  
44 articles included in the meta-analysis to ensure they met eligibility criteria. Gender and  
45  
46  
47 sexual orientation were considered because of underlying differences in the epidemics  
48  
49  
50 of HIV and trauma.<sup>30–32</sup> Specifically, populations were grouped as women and men, and  
51  
52  
53 samples of HIV-infected men were further classified into men who have sex with men  
54  
55  
56 (MSM) and non-MSM males.

### 54 **Assessment of methodological quality**

55  
56  
57 We used the quality assessment forms for cross-sectional/prevalence studies  
58  
59  
60

1  
2  
3  
4  
5 recommended by the U.S. Agency for Healthcare Research and Quality (AHRQ)<sup>33</sup> to  
6  
7 assess the reliability of the eligible studies. The checklist included 11 items. Each item  
8  
9 was coded with a “Yes/No/Unclear”: “No” or “Unclear” was scored “0”, and “Yes” was  
10  
11 scored “1”. Consistent with previous meta-analysis studies using the AHRQ  
12  
13 assessments, a total score of 8-11, 4-7, and 0-3 indicated high, moderate and low  
14  
15 quality, respectively.  
16  
17  
18  
19

### 20 21 **Meta-analysis**

22  
23 In this study, all statistical analyses were performed using Stata 12.0 software (STATA  
24  
25 Corporation, College Station, TX)<sup>34</sup>. Heterogeneity was tested and quantified by the  
26  
27 chi-square Q statistic and the  $I^2$  statistic. The prevalence of PTSD among PLWH were  
28  
29 combined and reported as proportions with corresponding 95% Confidence Intervals  
30  
31 (CI). The pooled prevalence was estimated using a random-effects model when  
32  
33 heterogeneity was statistically significant ( $I^2 > 50\%$ ,  $p \leq 0.10$ ). Otherwise, a fix-effects  
34  
35 model was used.<sup>35</sup> As sources of heterogeneity may arise from socio-demographic and  
36  
37 methodological factors, subgroup analyses were performed by (1) economic levels of  
38  
39 the study country, (2) gender/sexual orientation, (3) sampling method and (4)  
40  
41 assessment method for PTSD, when enough data was available. Chi-square ( $\chi^2$ ) tests  
42  
43 were further used to investigate whether there were significant differences between  
44  
45 groups. We only performed these subgroup analyses when data were extractable and  
46  
47 sufficient. Separate sensitivity analyses were used for studies with low quality to  
48  
49 examine the stability of the pooled prevalence. Publication bias was assessed using the  
50  
51  
52  
53  
54  
55  
56  
57  
58  
59  
60

1  
2  
3  
4  
5 Egger's and the Begg's tests.<sup>36-37</sup> Significance level of  $p$  values  $< 0.05$  were employed  
6  
7  
8 for all analyses.

### 9 10 **Patient and public involvement**

11  
12 Patients and the public were not involved in this study.

### 13 14 15 **Ethics approval**

16  
17  
18 As this study is a systematic review based on published studies, ethical approval is not  
19  
20  
21 required.

## 22 23 **RESULTS**

### 24 25 **Search results**

26  
27  
28 A total of 2396 records were identified by the electronic bibliographic database  
29  
30  
31 searches. Ten additional manuscripts were identified through other sources (e.g.,  
32  
33  
34 reference lists of review papers). From an initial screen of 2301 records after duplicates  
35  
36  
37 were removed, 2185 records were excluded on basis of title or abstract because those  
38  
39  
40 studies were not relevant to this review ( $n=2107$ ) or were reviews/commentary ( $n= 78$ ).  
41  
42  
43 The remaining 116 full articles were selected for the eligibility assessment. Of those, 7  
44  
45  
46 were excluded for repeated data, 9 were excluded for targeting PLWH who received  
47  
48  
49 psychological intervention or suffered from genocide/natural disaster, and 62 were  
50  
51  
52 excluded for not reporting the PTSD prevalence among PLWH. Finally, a total of 38  
53  
54  
55 studies<sup>14 24 25 38-72</sup> met inclusion criteria and were included in this meta-analysis. Search  
56  
57  
58 results are elaborated in Figure 1.

### 59 60 **Study characteristics**

1  
2  
3  
4  
5 Most of the papers (84.3%) scored 4 or more according to the AHRQ scale indicating a  
6  
7 generally moderate to high level of data quality (online supplementary appendix 2).  
8  
9

10 Table 1 shows the characteristics of the included studies. These studies were published  
11  
12 between 2002<sup>72</sup> and 2019.<sup>38</sup> Geographically, over half (n=21, 55.3%) of the 38 included  
13  
14 studies were conducted in the USA, followed by South Africa (n=6, 15.8%), China  
15  
16 (n=3, 7.9%), the United Kingdom (n=2, 5.3%), Rwanda (n=1, 2.6%) and low-income  
17  
18 countries including Gambia (n=1, 2.6%), Nigeria (n=1, 2.6%), Uganda (n=1, 2.6%),  
19  
20 Haiti (n=1, 2.6%) and Zimbabwe (n=1, 2.6%). Twenty-five studies (65.8%) measured  
21  
22 PTSD using diagnostic self-report questionnaires, while the other 13 studies (34.2%)  
23  
24 conducted clinical interviews to diagnose PTSD. Though 8 studies (21.1%) did not  
25  
26 report their sampling methods, convenience sampling methods were adopted in most  
27  
28 studies (n=20, 52.6%), followed by consecutive sampling (n=7, 18.4%), and probability  
29  
30 sampling (n=3, 7.9%). In all, 11743 PLWH were involved (sample size varied from 41  
31  
32 to 1489), of which 2742 were identified with PTSD.  
33  
34  
35  
36  
37  
38  
39  
40  
41  
42  
43  
44  
45  
46  
47  
48  
49  
50  
51  
52  
53  
54  
55  
56  
57  
58  
59  
60

**Table 1 Characteristics of the included studies**

| First author             | Year of publication | Location of study | Sampling methods     | Sample size* | No. of patients with PTSD | Measurements | Data Collection           | Quality  |
|--------------------------|---------------------|-------------------|----------------------|--------------|---------------------------|--------------|---------------------------|----------|
| Fabian <sup>38</sup>     | 2019                | USA               | convenience sampling | 238          | 80                        | PCL-C        | self-report questionnaire | moderate |
| Cheng <sup>39</sup>      | 2018                | China             | unclear              | 535          | 142                       | PCL-C        | self-report questionnaire | moderate |
| Spies <sup>40</sup>      | 2018                | South Africa      | convenience sampling | 68           | 10                        | DTS          | self-report questionnaire | moderate |
| Verhey <sup>41</sup>     | 2018                | Zimbabwe          | random sampling      | 91           | 22                        | CAPS         | clinical interview        | moderate |
| Gao <sup>42</sup>        | 2018                | China             | convenience sampling | 520          | 89                        | PCL-C        | self-report questionnaire | moderate |
| McLean <sup>43</sup>     | 2017                | USA               | convenience sampling | 42           | 12                        | PSS          | clinical interview        | moderate |
| Kemppainen <sup>25</sup> | 2017                | USA               | convenience sampling | 60           | 26                        | PCL-C        | self-report questionnaire | low      |
| Gonzalez <sup>24</sup>   | 2016                | USA               | convenience sampling | 137          | 47                        | PDS          | self-report questionnaire | moderate |
| Rubin <sup>44</sup>      | 2016                | USA               | convenience sampling | 1004         | 174                       | PCL-C        | self-report questionnaire | moderate |



|    |                           |      |              |                      |      |     |                 |                           |          |
|----|---------------------------|------|--------------|----------------------|------|-----|-----------------|---------------------------|----------|
| 1  |                           |      |              |                      |      |     |                 |                           |          |
| 2  |                           |      |              |                      |      |     |                 |                           |          |
| 3  |                           |      |              |                      |      |     |                 |                           |          |
| 4  |                           |      |              |                      |      |     |                 |                           |          |
| 5  | John <sup>45</sup>        | 2016 | USA          | consecutive sampling | 359  | 44  | Breslau         | self-report questionnaire | moderate |
| 6  |                           |      |              |                      |      |     |                 |                           |          |
| 7  |                           |      |              |                      |      |     |                 |                           |          |
| 8  | Julnes <sup>14</sup>      | 2016 | USA          | convenience sampling | 114  | 39  | CDQ             | self-report questionnaire | moderate |
| 9  |                           |      |              |                      |      |     |                 |                           |          |
| 10 |                           |      |              |                      |      |     |                 |                           |          |
| 11 | Zhang <sup>46</sup>       | 2016 | China        | convenience sampling | 243  | 106 | PCL-C           | self-report questionnaire | low      |
| 12 |                           |      |              |                      |      |     |                 |                           |          |
| 13 |                           |      |              |                      |      |     |                 |                           |          |
| 14 |                           |      |              |                      |      |     |                 |                           |          |
| 15 | Battaglia <sup>47</sup>   | 2015 | USA          | convenience sampling | 200  | 72  | PTSD checklist  | self-report questionnaire | moderate |
| 16 |                           |      |              |                      |      |     |                 |                           |          |
| 17 |                           |      |              |                      |      |     |                 |                           |          |
| 18 | Hansrod <sup>48</sup>     | 2015 | South Africa | convenience sampling | 114  | 29  | MINI            | clinical interview        | moderate |
| 19 |                           |      |              |                      |      |     |                 |                           |          |
| 20 |                           |      |              |                      |      |     |                 |                           |          |
| 21 | Brownley <sup>49</sup>    | 2015 | USA          | unclear              | 220  | 78  | PSS             | self-report questionnaire | moderate |
| 22 |                           |      |              |                      |      |     |                 |                           |          |
| 23 |                           |      |              |                      |      |     |                 |                           |          |
| 24 | Malee <sup>50</sup>       | 2014 | USA          | convenience sampling | 1223 | 281 | CDQ             | self-report questionnaire | high     |
| 25 |                           |      |              |                      |      |     |                 |                           |          |
| 26 |                           |      |              |                      |      |     |                 |                           |          |
| 27 | Glémaud <sup>51</sup>     | 2014 | USA          | unclear              | 96   | 33  | PRIME MD<br>PHQ | clinical interview        | low      |
| 28 |                           |      |              |                      |      |     |                 |                           |          |
| 29 |                           |      |              |                      |      |     |                 |                           |          |
| 30 | Gore-Felton <sup>52</sup> | 2013 | USA          | convenience sampling | 94   | 28  | PCL-C           | self-report questionnaire | low      |
| 31 |                           |      |              |                      |      |     |                 |                           |          |
| 32 |                           |      |              |                      |      |     |                 |                           |          |
| 33 |                           |      |              |                      |      |     |                 |                           |          |
| 34 | Glover <sup>53</sup>      | 2013 | USA          | convenience sampling | 99   | 24  | PDS             | self-report questionnaire | high     |
| 35 |                           |      |              |                      |      |     |                 |                           |          |
| 36 |                           |      |              |                      |      |     |                 |                           |          |
| 37 | Déviex <sup>54</sup>      | 2013 | Haiti        | convenience sampling | 104  | 52  | PCL-C           | self-report questionnaire | moderate |
| 38 |                           |      |              |                      |      |     |                 |                           |          |
| 39 |                           |      |              |                      |      |     |                 |                           |          |
| 40 |                           |      |              |                      |      |     |                 |                           |          |
| 41 |                           |      |              |                      |      |     |                 |                           |          |
| 42 |                           |      |              |                      |      |     |                 |                           |          |
| 43 |                           |      |              |                      |      |     |                 |                           |          |
| 44 |                           |      |              |                      |      |     |                 |                           |          |
| 45 |                           |      |              |                      |      |     |                 |                           |          |
| 46 |                           |      |              |                      |      |     |                 |                           |          |

|    |                         |      |              |                      |     |     |            |                           |          |
|----|-------------------------|------|--------------|----------------------|-----|-----|------------|---------------------------|----------|
| 1  |                         |      |              |                      |     |     |            |                           |          |
| 2  |                         |      |              |                      |     |     |            |                           |          |
| 3  |                         |      |              |                      |     |     |            |                           |          |
| 4  |                         |      |              |                      |     |     |            |                           |          |
| 5  | Gard <sup>55</sup>      | 2013 | Rwanda       | unclear              | 705 | 380 | HTS        | self-report questionnaire | moderate |
| 6  |                         |      |              |                      |     |     |            |                           |          |
| 7  |                         |      |              |                      |     |     |            |                           |          |
| 8  | Peterson <sup>56</sup>  | 2012 | Gambia       | consecutive sampling | 153 | 46  | IES-R      | self-report questionnaire | high     |
| 9  |                         |      |              |                      |     |     |            |                           |          |
| 10 |                         |      |              |                      |     |     |            |                           |          |
| 11 | Kinyanda <sup>57</sup>  | 2011 | Uganda       | consecutive sampling | 618 | 10  | MINI       | clinical interview        | moderate |
| 12 |                         |      |              |                      |     |     |            |                           |          |
| 13 |                         |      |              |                      |     |     |            |                           |          |
| 14 |                         |      |              |                      |     |     |            |                           |          |
| 15 | Bogart <sup>58</sup>    | 2011 | USA          | convenience sampling | 181 | 72  | PDS        | self-report questionnaire | moderate |
| 16 |                         |      |              |                      |     |     |            |                           |          |
| 17 |                         |      |              |                      |     |     |            |                           |          |
| 18 | Martin <sup>59</sup>    | 2011 | UK           | convenience sampling | 85  | 46  | CIDI       | clinical interview        | moderate |
| 19 |                         |      |              |                      |     |     |            |                           |          |
| 20 |                         |      |              |                      |     |     |            |                           |          |
| 21 | Reisner <sup>60</sup>   | 2011 | USA          | convenience sampling | 63  | 16  | AUDADIS-IV | clinical interview        | moderate |
| 22 |                         |      |              |                      |     |     |            |                           |          |
| 23 |                         |      |              |                      |     |     |            |                           |          |
| 24 | Theuninck <sup>61</sup> | 2010 | UK           | convenience sampling | 100 | 33  | PCL-C      | self-report questionnaire | low      |
| 25 |                         |      |              |                      |     |     |            |                           |          |
| 26 |                         |      |              |                      |     |     |            |                           |          |
| 27 |                         |      |              |                      |     |     |            |                           |          |
| 28 | Joska <sup>62</sup>     | 2010 | South Africa | unclear              | 536 | 164 | HTS        | self-report questionnaire | moderate |
| 29 |                         |      |              |                      |     |     |            |                           |          |
| 30 |                         |      |              |                      |     |     |            |                           |          |
| 31 | Adewuya <sup>63</sup>   | 2009 | Nigeria      | unclear              | 190 | 52  | MINI       | clinical interview        | moderate |
| 32 |                         |      |              |                      |     |     |            |                           |          |
| 33 |                         |      |              |                      |     |     |            |                           |          |
| 34 | Spies <sup>64</sup>     | 2009 | South Africa | unclear              | 429 | 92  | MINI       | clinical interview        | moderate |
| 35 |                         |      |              |                      |     |     |            |                           |          |
| 36 |                         |      |              |                      |     |     |            |                           |          |
| 37 | Fincham <sup>65</sup>   | 2008 | South Africa | consecutive sampling | 456 | 23  | MINI       | clinical interview        | moderate |
| 38 |                         |      |              |                      |     |     |            |                           |          |
| 39 |                         |      |              |                      |     |     |            |                           |          |
| 40 |                         |      |              |                      |     |     |            |                           |          |
| 41 |                         |      |              |                      |     |     |            |                           |          |
| 42 |                         |      |              |                      |     |     |            |                           |          |
| 43 |                         |      |              |                      |     |     |            |                           |          |
| 44 |                         |      |              |                      |     |     |            |                           |          |
| 45 |                         |      |              |                      |     |     |            |                           |          |
| 46 |                         |      |              |                      |     |     |            |                           |          |

|                         |      |              |                      |      |     |                |                           |          |
|-------------------------|------|--------------|----------------------|------|-----|----------------|---------------------------|----------|
| Zanjani <sup>66</sup>   | 2007 | USA          | random sampling      | 109  | 13  | MINI           | clinical interview        | moderate |
| Israelski <sup>67</sup> | 2007 | USA          | unclear              | 210  | 71  | PCL-C          | self-report questionnaire | low      |
| Boarts <sup>68</sup>    | 2006 | USA          | convenience sampling | 57   | 24  | PDS            | self-report questionnaire | moderate |
| Leserman <sup>69</sup>  | 2005 | USA          | consecutive sampling | 611  | 98  | PTSD checklist | self-report questionnaire | high     |
| Olley <sup>70</sup>     | 2003 | South Africa | consecutive sampling | 149  | 42  | MINI           | clinical interview        | moderate |
| Vitiello <sup>71</sup>  | 2003 | USA          | probability sample   | 1489 | 155 | CIDI           | clinical interview        | moderate |
| Martinez <sup>72</sup>  | 2002 | USA          | consecutive sampling | 41   | 17  | PCL-C          | self-report questionnaire | moderate |

\* Total number of adults living with HIV

*PCL-C* Posttraumatic Stress Disorder Checklist-Civilian Version; *DTS* Davidson Trauma Scale; *CAPS* Clinician Administered Post-traumatic Stress Scale; *CDQ* Client Diagnostic Questionnaire; *PDS* Posttraumatic Stress Diagnostic Scale – Self-report version; *PSS* Posttraumatic Stress Symptom Scale; *PRIME MD PHQ* Primary Care Evaluation of Mental Disorders Patient Health Questionnaire; *AUDADIS-IV* The Alcohol Use Disorder and Associated Disabilities Interview Schedule-IV; *MINI* Mini-International Neuropsychiatric

1  
2  
3  
4  
5 Interview; *IES-R* Impact of Event Scale-Revised; *HTS* the Harvard trauma scale; *DIS-IV* Diagnostic Interview Schedule for DSM-IV  
6  
7  
8 diagnoses; *PTSD checklist* Posttraumatic Stress Disorder Checklist; *CIDI* Clinical Interview for Diagnosis for DSM-IV  
9  
10  
11  
12  
13  
14  
15  
16  
17  
18  
19  
20  
21  
22  
23  
24  
25  
26  
27  
28  
29  
30  
31  
32  
33  
34  
35  
36  
37  
38  
39  
40  
41  
42  
43  
44  
45  
46

For peer review only

## Prevalence of PTSD in PLWH

The reported prevalence of PTSD in PLWH ranged from 1.6%<sup>57</sup> to 54.1%<sup>59</sup>. The overall pooled prevalence was 28% (95%CI: 24% to 33%), estimated by a random effects model, as significant heterogeneity ( $p \leq 0.001$ ,  $I^2=98.1\%$ ) was observed among the included studies. Meta-analyses are shown as forest plots (Fig. 2).

## Publication bias and sensitivity analysis

Possible publication bias was indicated according to the results of Egger's linear test ( $t=6.84$ ,  $p < 0.05$ ) and Begg's rank test ( $z=0.58$ ,  $p=0.56$ ). However, low sensitivity was suggested with the pooled prevalence of PTSD changed slightly from 28% (95%CI: 24% to 33%) to 27% (95%CI: 22% to 32%) after excluding low-quality articles.

## Subgroup Analyses

The results of subgroup analyses are shown in Table 2. The prevalence of PTSD in PLWH differed significantly by geographic area, population group, sampling and measurement method. Specifically, the proportion of PLWH with PTSD in high-income countries tended to be higher (pooled rate= 29%, 95%CI 25% to 34%) than middle-income countries (pooled rate= 27%, 95%CI 16% to 37%) and low-income countries (pooled rate= 26%, 95%CI 7% to 45%). Studies using clinical interviews reported lower rates of PTSD (pooled rate= 22%, 95%CI 16% to 27%) compared with those using self-report questionnaires (pooled rate= 31%, 95%CI 27% to 36%). The pooled PTSD prevalence among women living with HIV, MSM living with HIV and non-MSM men living with HIV were 35% (95%CI: 28% to 43%), 33% (95%CI: 29% to 38%) and 20%

1  
2  
3  
4  
5 (95%CI: 17% to 23%), respectively. Also, studies conducted with convenience  
6  
7  
8 sampling were more likely to have higher PTSD prevalence (pooled rate= 32%, 95%CI  
9  
10 27% to 37%) than those using consecutive sampling (pooled rate= 17%, 95%CI 10% to  
11  
12  
13 24%).  
14  
15  
16  
17  
18  
19  
20  
21  
22  
23  
24  
25  
26  
27  
28  
29  
30  
31  
32  
33  
34  
35  
36  
37  
38  
39  
40  
41  
42  
43  
44  
45  
46  
47  
48  
49  
50  
51  
52  
53  
54  
55  
56  
57  
58  
59  
60

For peer review only

**Table 2 Subgroup analyses of the prevalence of PTSD in PLWH**

| Subgroup         | Number of studies            | Positive PTSD screening (Diagnosis) | Sample size (Tested) | Pooled prevalence of PTSD (95%CI) | Heterogeneity (I <sup>2</sup> ) | Between group difference |         |        |
|------------------|------------------------------|-------------------------------------|----------------------|-----------------------------------|---------------------------------|--------------------------|---------|--------|
|                  |                              |                                     |                      |                                   |                                 | $\chi^2$                 | P value |        |
| Geographic area  | High-income countries        | 23                                  | 1483                 | 6832                              | 0.29(0.25-0.34)                 | 94.70%                   | 107.32  | <0.001 |
|                  | Middle-income countries      | 10                                  | 1077                 | 3755                              | 0.27(0.16-0.37)                 | 98.60%                   |         |        |
|                  | Low-income countries         | 5                                   | 182                  | 1156                              | 0.26(0.07-0.45)                 | 98.30%                   |         |        |
| Population group | Women living with HIV        | 15                                  | 1282                 | 4190                              | 0.35(0.28-0.43)                 | 96.10%                   | 26.99   | <0.001 |
|                  | MSM living with HIV          | 3                                   | 129                  | 380                               | 0.33(0.29-0.38)                 | 73.70%                   |         |        |
|                  | non-MSM male living with HIV | 4                                   | 165                  | 754                               | 0.20(0.17-0.23)                 | 89.10%                   |         |        |
| Sampling         | Consecutive sampling         | 7                                   | 280                  | 2387                              | 0.17(0.10-0.24)                 | 97.30%                   | 206.01  | <0.001 |
|                  | Convenience sampling         | 20                                  | 1260                 | 4746                              | 0.32(0.27-0.37)                 | 91.60%                   |         |        |

|                 |                           |    |      |      |                 |        |        |        |
|-----------------|---------------------------|----|------|------|-----------------|--------|--------|--------|
| Data collection | Self-report questionnaire | 25 | 2197 | 7812 | 0.31(0.27-0.36) | 95.70% | 297.01 | <0.001 |
|                 | Clinical interview        | 13 | 545  | 3931 | 0.22(0.16-0.27) | 97.20% |        |        |

For peer review only

1  
2  
3  
4  
5  
6  
7  
8  
9  
10  
11  
12  
13  
14  
15  
16  
17  
18  
19  
20  
21  
22  
23  
24  
25  
26  
27  
28  
29  
30  
31  
32  
33  
34  
35  
36  
37  
38  
39  
40  
41  
42  
43  
44  
45  
46



## DISCUSSION

To the best of our knowledge, this is the first meta-analysis to provide the pooled estimated prevalence of PTSD among PLWH. A comprehensive search of the literature assessing the rate of comorbidity between PTSD and HIV-infection was performed, and 38 studies met the predefined criteria and were included in the meta-analysis. A total of 11743 participants were involved, of which 2742 were identified with PTSD. The estimated pooled prevalence was 28% (95% CI: 24% to 33%), which suggests a considerable burden of PTSD in the HIV-infected population. High heterogeneity across studies was detected, and factors such as differences in region, population characteristics, sampling, and measurement were associated with the prevalence.

As indicated, the PTSD prevalence among PLWH found in this study (28%) not only far exceeded that among the general population (3.9%),<sup>73</sup> but was also much higher than the prevalence of PTSD among other vulnerable groups in some previous studies. For example, the prevalence for cancer-related PTSD was 5.1%-15.3%;<sup>74</sup> in persons with chronic pain, the estimated mean prevalence of PTSD was 9.7%.<sup>75</sup> The pooled prevalence of PTSD among PLWH found in this study heightened the high rate of co-morbidity between HIV infection and PTSD, which is consistent with previous demonstrations.<sup>8 76</sup> For PLWH, although depressive symptoms have been the focus of many studies, and 36% of PLWH were likely to have depression according to nationally representative data in the U.S.,<sup>77</sup> this pooled estimated prevalence of PTSD among PLWH showed that PTSD is also a common mental disorder among individuals living

1  
2  
3  
4  
5 with HIV/AIDS. Therefore, the results of our study significantly underscore the  
6  
7 importance of early assessment and trauma-directed psychological interventions for  
8  
9 PLWH.  
10  
11

12  
13 Undoubtedly, heterogeneity between studies is expected in such a relatively large  
14  
15 topic of review. In this review, the estimated PTSD prevalence in PLWH varied widely  
16  
17 (1.6%-54.1%) across studies and countries, which is also a common problem in the  
18  
19 epidemiology of psychological and mental health disorders.<sup>78 79</sup> Consistent with the  
20  
21 findings of previous research,<sup>59</sup> the majority of studies which have determined the  
22  
23 incidence of HIV-related PTSD have been conducted in developed countries (n=23).  
24  
25 Compared with lower-income countries, higher-income countries reported relatively  
26  
27 higher prevalence of PTSD. This tendency and the varied prevalence of PTSD among  
28  
29 PLWH may be explained by the cross-cultural differences in attitudes towards HIV  
30  
31 infection. Turan et al.<sup>80</sup> found that the level of perceived HIV-related stigma in the  
32  
33 community experienced by PLWH may cause adverse health and psychosocial  
34  
35 outcomes. Social isolation and stigma might exacerbate symptoms of PTSD.<sup>81</sup> In high-  
36  
37 income countries, PLWH may experience “compound” or “layered” stigma, where  
38  
39 stigmatizing beliefs are not only associated with HIV infection but also related to sexual  
40  
41 orientation, commercial sexual behaviors, etc.<sup>82</sup> Although, HIV-related stigma is highly  
42  
43 burdensome in some mid-income countries, such as China,<sup>83 84</sup> the reported prevalence  
44  
45 of PLWH with PTSD was lower compared to higher-income countries. The differences  
46  
47 between collectivism and individualism rooted in eastern and western culture may be an  
48  
49  
50  
51  
52  
53  
54  
55  
56  
57  
58  
59  
60

1  
2  
3  
4  
5 explanation.<sup>85</sup> It is worth noting that social context may not only influence the  
6  
7  
8 susceptibility of mental health disorders, but also constitutes an important factor in  
9  
10 perceived stigma among individuals with mental illness. Compared to high-income  
11  
12 countries, stigmatizing beliefs about the causes and presence of mental illness are still  
13  
14 widespread in low- and middle-income countries,<sup>86 87</sup> which may lead to less disease  
15  
16 reporting. Caution must be applied, since there is a lack of studies investigating HIV-  
17  
18 related PTSD in lower- (n=5) and middle-income (n=10) countries. In particular,  
19  
20  
21 detection of prevalence is associated with the representativeness and size of sample. In  
22  
23 the context of low- and middle-income countries, it could be argued that lower HIV  
24  
25 testing rates may underestimate the PTSD prevalence and impact generalizability. Thus,  
26  
27  
28 more epidemiological studies are warranted to better understand and clarify the  
29  
30  
31 difference in PTSD prevalence among PLWH globally.  
32  
33  
34  
35

36 Subgroup analyses indicated that the prevalence of PTSD differed significantly  
37  
38 when gender and sexual orientation were taken into consideration. Specifically, women  
39  
40 living with HIV exhibited a higher prevalence of PTSD (35%) in comparison with both  
41  
42 MSM (33%) and non-MSM male (20%) groups. This matches the pattern of prevalence  
43  
44 in PTSD, in which being female is a risk factor associated with PTSD development.<sup>16</sup>  
45  
46  
47 As suggested by the aforementioned findings, MSM living with HIV may experience  
48  
49  
50 higher levels of stigma and trauma related to their sexual orientation.<sup>30 88</sup> Compared  
51  
52  
53 with heterosexual counterparts, MSM reported higher risk for suicidal ideation,<sup>89</sup> which  
54  
55  
56 also indicates greater psychological stress and mental health problems (i.e. PTSD and  
57  
58  
59  
60

1  
2  
3  
4  
5 depression). The findings that MSM and female HIV-infected individuals are at higher  
6  
7 risk of developing PTSD may indicate that related health promotion campaigns should  
8  
9 be directed to these groups. Clinicians should also take into consideration the PTSD  
10  
11 susceptibility in different groups of HIV-infected populations during diagnoses.  
12  
13

14  
15 Notably, most eligible studies did not provide separate the prevalence regarding the  
16  
17 gender of participants, and only 3 studies identified PTSD prevalence among MSM  
18  
19 living with HIV. Given that these data are from a small number of studies and/or  
20  
21 participants, this finding should be interpreted with caution. Nonetheless, given the high  
22  
23 prevalence of PTSD in this group, future efforts should be made to obtain more  
24  
25 prevalence data on PTSD among MSM living with HIV.  
26  
27  
28  
29

30  
31 In our study, we assessed methodological differences that may result in  
32  
33 heterogeneity. Factors including sampling strategies (convenience vs consecutive) and  
34  
35 measurement (self-report vs clinical interview) were evaluated by subgroup analyses.  
36  
37 Among 38 studies providing estimated prevalence of PTSD, 7 reported participants  
38  
39 were consecutively enrolled via self-referral from flyers describing the study or  
40  
41 advertisements from HIV health care providers, and generated a lower pooled rate  
42  
43 (17%) compared with the other 20 studies using convenience sampling (32%), though  
44  
45 both sampling methods were non-probabilistic. An increase in reporting rate due to  
46  
47 convenience sampling has also been found in another meta-analysis synthesizing the  
48  
49 HCV seroconversion rates in MSM living with HIV.<sup>90</sup> Convenience samples may allow  
50  
51 researchers to select participants who are more likely to have PTSD symptoms and lead  
52  
53  
54  
55  
56  
57  
58  
59  
60

1  
2  
3  
4  
5 to over-estimation, but given that only 4 studies were rated as high quality and limited  
6  
7 description of study methods was detected in some studies, the reporting of  
8  
9 epidemiology may not be sufficient to draw conclusions. Therefore, the appropriateness  
10  
11 of calculating pooled prevalence estimates could be questioned, and the pooled  
12  
13 prevalence estimate regarding the varied recruitment approaches of the studies should  
14  
15 be interpreted with caution.  
16  
17  
18  
19

20  
21 In this review, a total of 14 different tools were used to assess PTSD symptoms  
22  
23 among PLWH across studies. Overall, the prevalence of PTSD screened by self-report  
24  
25 instruments (31%) was higher than that assessed by clinical interview (22%). Though  
26  
27 both measurements were in accordance with the diagnostic criteria (i.e. DSM or ICD),  
28  
29 clinical interviews most likely do a much better job of assessing symptoms carefully –  
30  
31 for example, not counting symptoms that do not meet clinically meaningful thresholds,  
32  
33 and self-report measures may inflate the prevalence estimates;<sup>91</sup> alternatively, subjects  
34  
35 may be more comfortable reporting symptoms using self-report questionnaires  
36  
37 (presumably paper or online surveys rather than face-to-face interviews). Screening or  
38  
39 diagnosing with survey instruments is a common and practical method, especially in  
40  
41 resource-limited regions. We found that, though a number of measures have been used  
42  
43 to assess PTSD among PLWH, there is no tool designed for this population specifically.  
44  
45 As the sensitivity and specificity of the measures may impact accurate PTSD detection,  
46  
47 further research is required to identify a standardized measure accordingly to improve  
48  
49 validity.  
50  
51  
52  
53  
54  
55  
56  
57  
58  
59  
60

1  
2  
3  
4  
5 Certain limitations should be acknowledged in this meta-analysis. First, though  
6  
7 minimal potential for publication bias was presumed as all data drawn for this review  
8  
9 were from studies reporting estimated point prevalence without intervention,  
10  
11 publication bias cannot be ruled out for there are a number of studies published in  
12  
13 languages other than English and Chinese that were not included in this review. Second,  
14  
15 the heterogeneity was high in the whole sample and most subgroups. Heterogeneity  
16  
17 importantly influences the reliability and accuracy of a meta-analysis, and the only  
18  
19 reliable method for acquiring correct inferences is careful selection of appropriate  
20  
21 studies.<sup>92</sup> Even though strict eligibility criteria were employed in addressing PTSD  
22  
23 prevalence in this study, it should be noted that getting HIV is only one possible  
24  
25 traumatic event, and therefore it is possible that the PTSD experienced by participants  
26  
27 in the selected studies was due to an event other than finding out they were HIV  
28  
29 positive. Accordingly, we suggest that further studies assessing PTSD among PLWH  
30  
31 include more detail on the specific traumas experienced by study participants. In  
32  
33 addition, we have analysed the influences of region, population group, recruitment  
34  
35 venue, and measurement method, which explained some of the heterogeneity. However,  
36  
37 the results should be interpreted with caution. Third, though some studies have  
38  
39 indicated that several sociodemographic factors such as age may be associated with  
40  
41 PTSD incidence among PLWH, we were unable to conduct subgroup analyses stratified  
42  
43 by age due to the lack of detailed information reported in the published studies. As the  
44  
45 quality of reporting could increase the susceptibility to bias, it is imperative for  
46  
47  
48  
49  
50  
51  
52  
53  
54  
55  
56  
57  
58  
59  
60

1  
2  
3  
4  
5 researchers to report their findings of observational studies in accordance with the  
6  
7 appropriate guidelines, such as the STROBE checklist.  
8  
9

## 10 **CONCLUSIONS**

11  
12 This review contributes to evidence on the quantitatively pooled prevalence of PTSD  
13 among PLWH. Stratified subgroups including geographic area, population group,  
14  
15 sampling and measurement method were found to be significant factors accounting for  
16  
17 the varied prevalence of PTSD among PLWH. More effective intervention strategies  
18  
19 targeting PTSD among PLWH are urgently needed. Future efforts should be made to  
20  
21 obtain countries' own PTSD prevalence data among PLWH as well as specific  
22  
23 vulnerable minorities, which will provide a basis for public health policy, health-care  
24  
25 planning, and resource allocation for PTSD intervention initiatives. Our study also  
26  
27 suggests that more research using robust and comprehensive methodology is needed to  
28  
29 provide rigorous evidence for designing the targeted psychological interventions.  
30  
31  
32  
33  
34  
35  
36  
37  
38  
39  
40

41 **Figure 1** Flow chart of study inclusion

42  
43 **Figure 2** Forest plot presenting the prevalence of PTSD in PLWH

44  
45 **Contributors:** Conception of the work: HW and CT. Systematic review and article  
46  
47 evaluation: CT, JM, XX and LZ. Data analysis: CT and XX. Results interpretation: CT,  
48  
49 LAG, HW and ABW. Drafting the article: CT, LAG, HW and ABW. Critical revision  
50  
51 of the manuscript: LAG, HW and ABW. Final approval of the manuscript: all the  
52  
53 authors. All the authors fulfill the ICMJE criteria for authorship.  
54  
55  
56  
57  
58  
59  
60

1  
2  
3  
4  
5 **Acknowledgements:** The authors would like to thank Dr. TIAN Hongping, Rory  
6  
7 Meyers College of Nursing, New York University-for assistance in this systematic  
8  
9 review. CT is supported by the Scholarship from China Scholarship Council  
10  
11 (CSC.201806370166).  
12  
13

14  
15 **Funding:** This research received no specific grant from any funding body.  
16  
17

18 **Data sharing statement:** All data relevant to the study are included in the article or  
19  
20 uploaded as supplementary information.  
21  
22

23 **Competing interests:** None declared.  
24  
25  
26  
27

## 28 REFERENCES

- 29  
30  
31 1. UNAIDS. UNAIDS Data 2018.  
32  
33 <http://www.unaids.org/en/resources/documents/2018/unaids-data-2018> (Accessed  
34  
35 18 March 2019).  
36  
37  
38 2. Niu L, Luo D, Liu Y, *et al.* The mental health of people living with HIV in China,  
39  
40 1998–2014: a systematic review. *PLoS One*. 2016;11:e0153489.  
41  
42  
43 3. Adams C, Zacharia S, Masters L, *et al.* Mental health problems in people living with  
44  
45 HIV: changes in the last two decades: the London experience 1990–2014. *AIDS*  
46  
47 *care*. 2016;28:56–9.  
48  
49  
50 4. Friedman MJ, Resick PA, Bryant RA, *et al.* Considering PTSD for DSM-5.  
51  
52 *Depression and anxiety*. 2011;28:750–69.  
53  
54  
55 5. Young C. Understanding HIV-related posttraumatic stress disorder in South Africa:  
56  
57  
58  
59  
60



- 1  
2  
3  
4  
5 a review and conceptual framework. *African Journal of AIDS Research*.  
6  
7 2011;10:139–48.  
8  
9
- 10 6. Sherr L, Nagra N, Kulubya G, *et al*. HIV infection associated post-traumatic stress  
11 disorder and post-traumatic growth—a systematic review. *Psychology, health &*  
12 *medicine*. 2011;16:612–29.  
13  
14
- 15 7. Cavanaugh CE, Hansen NB, Sullivan TP. HIV sexual risk behavior among low-  
16 income women experiencing intimate partner violence: The role of posttraumatic  
17 stress disorder. *AIDS Behav*. 2010;14:318–27.  
18  
19
- 20 8. Neigh GN, Rhodes ST, Valdez A, *et al*. PTSD co-morbid with HIV: Separate but  
21 equal, or two parts of a whole? *Neurobiology of disease*. 2016;92:116–23.  
22  
23
- 24 9. Borwein A, Salters KA, Palmer AK, *et al*. High rates of lifetime and recent violence  
25 observed among harder-to-reach women living with HIV. *AIDS care*. 2014;26:587–  
26 94.  
27  
28
- 29 10. Luo S, Lin C, Ji G, *et al*. Post-traumatic Stress Disorder Symptoms Among People  
30 Living with HIV/AIDS in Rural China. *AIDS Behav*. 2017;21:3202–8.  
31  
32
- 33 11. Kessler RC. Posttraumatic stress disorder: the burden to the individual and to  
34 society. *The Journal of clinical psychiatry*. 2000;61(Suppl 5):4-14.  
35  
36
- 37 12. Pence BW. The impact of mental health and traumatic life experiences on  
38 antiretroviral treatment outcomes for people living with HIV/AIDS. *Journal of*  
39 *Antimicrobial Chemotherapy*. 2009;63:636–40.  
40  
41
- 42 13. Ebrahimzadeh Z, Goodarzi MA, Joulaei H. Predicting the Antiretroviral Medication  
43  
44  
45  
46  
47  
48  
49  
50  
51  
52  
53  
54  
55  
56  
57  
58  
59  
60

- 1  
2  
3  
4  
5 Adherence and CD4 Measure in Patients with HIV/AIDS Based on the Post  
6  
7 Traumatic Stress Disorder and Depression. *Iranian Journal of Public Health*.  
8  
9  
10 2019;48:139–46.  
11  
12  
13 14. Julnes PS, Auh S, Krakora R, *et al*. The association between post-traumatic stress  
14  
15 disorder and markers of inflammation and immune activation in HIV-infected  
16  
17 individuals with controlled viremia. *Psychosomatics*. 2016;57:423–30.  
18  
19  
20 21. Lynn C, Chenneville T, Bradley-Klug K, *et al*. Depression, anxiety, and  
22  
23 posttraumatic stress as predictors of immune functioning: differences between youth  
24  
25 with behaviorally and perinatally acquired HIV. *AIDS care*. 2019 Mar 4:1–10.  
26  
27  
28 29. Brief DJ, Bollinger AR, Vielhauer MJ, *et al*. Understanding the interface of HIV,  
30  
31 trauma, post-traumatic stress disorder, and substance use and its implications for  
32  
33 health outcomes. *AIDS care*. 2004;16:97–120.  
34  
35  
36 37. Nightingale VR, Sher TG, Mattson M, *et al*. The effects of traumatic stressors and  
38  
39 HIV-related trauma symptoms on health and health related quality of life. *AIDS*  
40  
41 *Behav*. 2011;15:1870–8.  
42  
43  
44 45. Koegler E, Kennedy CE. A scoping review of the associations between mental  
46  
47 health and factors related to HIV acquisition and disease progression in conflict-  
48  
49 affected populations. *Confl Health*. 2018;12:20.  
50  
51  
52 53. Pearson CR, Kaysen D, Huh D, *et al*. Randomized Control Trial of Culturally  
54  
55 Adapted Cognitive Processing Therapy for PTSD Substance Misuse and HIV  
56  
57 Sexual Risk Behavior for Native American Women. *AIDS Behav*. 2019;23:695–706.  
58  
59  
60

- 1  
2  
3  
4  
5 20. Tull MT, Weiss NH, McDermott MJ. Post-traumatic stress disorder and impulsive  
6  
7 and risky behavior: Overview and discussion of potential mechanisms.  
8  
9  
10 *Comprehensive guide to post-traumatic stress disorders*. 2016;803–16.  
11  
12  
13 21. Weiss NH, Tull MT, Borne MER, *et al*. Posttraumatic stress disorder symptom  
14  
15 severity and HIV-risk behaviors among substance-dependent inpatients. *AIDS care*.  
16  
17 2013;25:1219–26.  
18  
19  
20 22. Applebaum AJ, Bedoya CA, Hendriksen ES, *et al*. Future directions for  
21  
22 interventions targeting PTSD in HIV-infected adults. *Journal of the Association of*  
23  
24 *Nurses in AIDS Care*. 2015;26:127–38.  
25  
26  
27 23. Machtinger E, Wilson T, Haberer JE, *et al*. Psychological trauma and PTSD in HIV-  
28  
29 positive women: a meta-analysis. *AIDS Behav*. 2012;16:2091–100.  
30  
31  
32  
33 24. Gonzalez A, Locicero B, Mahaffey B, *et al*. Internalized HIV stigma and  
34  
35 mindfulness: associations with PTSD symptom severity in trauma-exposed adults  
36  
37 with HIV/AIDS. *Behavior modification*. 2016;40:144–63.  
38  
39  
40  
41 25. Kemppainen JK, MacKain S, Alexander M, *et al*. Posttraumatic stress disorder and  
42  
43 stressful life events among rural women with HIV disease. *Journal of the*  
44  
45 *Association of Nurses in AIDS Care*. 2017;28:216–25.  
46  
47  
48  
49 26. Rubin LH, Cook JA, Springer G, *et al*. Perceived and post-traumatic stress are  
50  
51 associated with decreased learning, memory, and fluency in HIV-infected women.  
52  
53 *AIDS (London, England)*. 2017;31:2393–1401.  
54  
55  
56  
57 27. Seedat S. Interventions to improve psychological functioning and health outcomes  
58  
59  
60

- of HIV-infected individuals with a history of trauma or PTSD. *Current HIV/AIDS Reports*. 2012;9:344–50.
28. World Health Organization. The ICD-10 classification of mental and behavioural disorders: clinical descriptions and diagnostic guidelines. Geneva: World Health Organization; 1992.
29. Association AP. Diagnostic and statistical manual of mental disorders. 5th Edition. Washington, DC: American Psychiatric Pub; 2013.
30. Sales JM, Swartzendruber A, Phillips AL. Trauma-Informed HIV Prevention and Treatment. *Curr HIV/AIDS Rep*. 2016;13:374–82.
31. Burnham KE, Cruess DG, Kalichman MO, *et al*. Trauma symptoms, internalized stigma, social support, and sexual risk behavior among HIV-positive gay and bisexual MSM who have sought sex partners online. *AIDS care*. 2016;28:347–53.
32. Rzeszutek M, Oniszczenko W, Firląg-Burkacka E. Gender differences in posttraumatic stress symptoms and social support in a sample of HIV-positive individuals. *Women & health*. 2017;57:792–803.
33. Rostom A, Dubé C, Cranney A, *et al*. Appendix D. Quality Assessment Forms. Agency for Healthcare Research and Quality (US); 2004  
<https://www.ncbi.nlm.nih.gov/books/NBK35156/> (Accessed 21 October 2018).
34. Stata C, Station C. TX. Stata Press 2016
35. Higgins JP, Thompson SG. Quantifying heterogeneity in a meta-analysis. *Statistics in medicine*. 2002;21(11):1539-58.

- 1  
2  
3  
4  
5 36. Egger M, Smith GD, Schneider M, *et al.* Bias in meta-analysis  
6  
7 detected by a simple, graphical test. *BMJ*. 1997; 315: 629–34.  
8  
9  
10 37. Begg CB, Mazumdar M. Operating characteristics of a rank correlation test for  
11  
12 publication bias. *Biometrics*. 1994; 50: 1088–101.  
13  
14  
15 38. Fabian KE, Huh D, Kemp CG, *et al.* Moderating Factors in an Anti-stigma  
16  
17 Intervention for African American Women with HIV in the United States: A  
18  
19 Secondary Analysis of the UNITY Trial. *AIDS and Behavior*. 2019;19:1-11.  
20  
21  
22 39. Chen CD, Yan H, Li SY, *et al.* Post-traumatic stress disorder and it associated  
23  
24 factors among people living with HIV in Wuhan city. *Chin J Public Health*. 2018;1-  
25  
26 4.  
27  
28  
29 40. Spies G, Konkiewitz EC, Seedat S. Incidence and persistence of depression among  
30  
31 women living with and without HIV in South Africa: A longitudinal study. *AIDS*  
32  
33 *Behav*. 2018;22(10):3155–65.  
34  
35  
36 41. Verhey R, Chibanda D, Gibson L, *et al.* Validation of the posttraumatic stress  
37  
38 disorder checklist - 5 (PCL-5) in a primary care population with high HIV  
39  
40 prevalence in Zimbabwe. *BMC Psychiatry*. 2018;18:109.  
41  
42  
43 42. Gao M, Xiao C, Zhang X, *et al.* Social capital and PTSD among PLWHA in China:  
44  
45 the mediating role of resilience and internalized stigma. *Psychology, health &*  
46  
47 *medicine*. 2018;23:698–706.  
48  
49  
50 43. McLean CP, Gay NG, Metzger DA, *et al.* Psychiatric Symptoms and Barriers to  
51  
52 Care in HIV-Infected Individuals Who Are Lost to Care. *J Int Assoc Provid AIDS*  
53  
54  
55  
56  
57  
58  
59  
60

- Care. 2017;16:423–9.
44. Rubin LH, Pyra M, Cook JA, *et al.* Post-traumatic stress is associated with verbal learning, memory, and psychomotor speed in HIV-infected and HIV-uninfected women. *Journal of neurovirology*. 2016;22:159–69.
45. John M, Greene M, Hessel NA, *et al.* Geriatric assessments and association with VACS index among HIV-infected older adults in San Francisco. *Journal of acquired immune deficiency syndromes (1999)*. 2016;72:534.
46. Zhang X, Wang T, Liu M, *et al.* Post-traumatic stress disorder among people living with HIV/AIDS and its influence factors. *Chongqing Medicine*. 2016;232–5.
47. Battaglia TA, Gunn CM, McCoy ME, *et al.* Beliefs About Anal Cancer among HIV-Infected Women: Barriers and Motivators to Participation in Research. *Womens Health Issues*. 2015;25:720–6.
48. Hansrod F, Spies G, Seedat S. Type and severity of intimate partner violence and its relationship with PTSD in HIV-infected women. *Psychology, health & medicine*. 2015;20:697–709.
49. Brownley JR, Falloot RD, Berley RW, *et al.* Trauma history in African-American women living with HIV: effects on psychiatric symptom severity and religious coping. *AIDS care*. 2015;27:964–71.
50. Malee K, Mellins CA, Huo Y, *et al.* Prevalence, incidence and persistence of psychiatric and substance use disorders among mothers living with HIV. *Journal of acquired immune deficiency syndromes (1999)*. 2014;65:526.

- 1  
2  
3  
4  
5 51. Glémaud M, Illa L, Echenique M, *et al.* Abuse and mental health concerns among  
6  
7 HIV-infected Haitian women living in the United States. *Journal of the Association*  
8  
9 of Nurses in *AIDS Care*. 2014;25:S62–9.  
10  
11  
12  
13 52. Gore-Felton C, Ginzburg K, Chartier M, *et al.* Attachment style and coping in  
14  
15 relation to posttraumatic stress disorder symptoms among adults living with  
16  
17 HIV/AIDS. *Journal of behavioral medicine*. 2013;36:51–60.  
18  
19  
20  
21 53. Glover DA, Williams JK, Kisler KA. Using novel methods to examine stress among  
22  
23 HIV-positive African American men who have sex with men and women. *J Behav*  
24  
25 *Med*. 2013;36:283–94.  
26  
27  
28  
29 54. Dévieux JG, Malow RM, Attonito JM, *et al.* Post-traumatic stress disorder  
30  
31 symptomatology and alcohol use among HIV-seropositive adults in Haiti. *AIDS*  
32  
33 *care*. 2013;25(10):1210-8.  
34  
35  
36  
37 55. Gard TL, Hoover DR, Shi Q, *et al.* The impact of HIV status, HIV disease  
38  
39 progression, and post-traumatic stress symptoms on the health-related quality of life  
40  
41 of Rwandan women genocide survivors. *Quality of Life Research*. 2013;22(8):2073-  
42  
43 84.  
44  
45  
46  
47 56. Peterson K, Togun T, Klis S, *et al.* Depression and posttraumatic stress disorder  
48  
49 among HIV-infected Gambians on antiretroviral therapy. *AIDS patient care and*  
50  
51 *STDs*. 2012;26:589–96.  
52  
53  
54  
55 57. Kinyanda E, Hoskins S, Nakku J, *et al.* Prevalence and risk factors of major  
56  
57 depressive disorder in HIV/AIDS as seen in semi-urban Entebbe district, Uganda.  
58  
59  
60

- 1  
2  
3  
4  
5 *BMC psychiatry*. 2011;11:205.  
6  
7  
8 58. Bogart LM, Wagner GJ, Galvan FH, *et al*. Perceived discrimination and mental  
9  
10 health symptoms among Black men with HIV. *Cultural Diversity and Ethnic*  
11  
12 *Minority Psychology*. 2011;17:295.  
13  
14  
15 59. Martin L, Kagee A. Lifetime and HIV-related PTSD among persons recently  
16  
17 diagnosed with HIV. *AIDS Behav*. 2011;15:125–31.  
18  
19  
20 60. Reisner SL, Falb KL, Mimiaga MJ. Early life traumatic stressors and the mediating  
21  
22 role of PTSD in incident HIV infection among US men, comparisons by sexual  
23  
24 orientation and race/ethnicity: results from the NESARC, 2004–2005. *Journal of*  
25  
26 *Acquired Immune Deficiency Syndromes*. 2011;57:340–50.  
27  
28  
29 61. Theuninck AC, Lake N, Gibson S. HIV-related posttraumatic stress disorder:  
30  
31 Investigating the traumatic events. *AIDS Patient care and STDS*. 2010;24:485–91.  
32  
33  
34 62. Joska JA, Fincham DS, Stein DJ, *et al*. Clinical correlates of HIV-associated  
35  
36 neurocognitive disorders in South Africa. *AIDS Behav*. 2010;14:371–8.  
37  
38  
39 63. Adewuya AO, Afolabi MO, Ola BA, *et al*. Post-traumatic stress disorder (PTSD)  
40  
41 after stigma related events in HIV infected individuals in Nigeria. *Social Psychiatry*  
42  
43 *and Psychiatric Epidemiology*. 2009;44:761.  
44  
45  
46 64. Spies G, Kader K, Kidd M, *et al*. Validity of the K-10 in detecting DSM-IV-defined  
47  
48 depression and anxiety disorders among HIV-infected individuals. *AIDS care*.  
49  
50 2009;21:1163–8.  
51  
52  
53  
54  
55  
56  
57 65. Fincham D, Smit J, Carey P, *et al*. The relationship between behavioural inhibition,  
58  
59  
60



- 1  
2  
3  
4  
5 anxiety disorders, depression and CD4 counts in HIV-positive adults: a cross-  
6  
7 sectional controlled study. *AIDS care*. 2008;20:1279–83.  
8  
9
- 10 66. Zanjani F, Saboe K, Oslin D. Age difference in rates of mental health/substance  
11  
12 abuse and behavioral care in HIV-positive adults. *AIDS patient care and STDs*.  
13  
14 2007;21:347–55.  
15  
16
- 17 67. Israelski DM, Prentiss DE, Lubega S, *et al*. Psychiatric co-morbidity in vulnerable  
18  
19 populations receiving primary care for HIV/AIDS. *AIDS care*. 2007;19:220–5.  
20  
21  
22
- 23 68. Boarts JM, Sledjeski EM, Bogart LM, *et al*. The differential impact of PTSD and  
24  
25 depression on HIV disease markers and adherence to HAART in people living with  
26  
27 HIV. *AIDS Behav*. 2006;10:253–61.  
28  
29  
30
- 31 69. Leserman J, Whetten K, Lowe K, *et al*. How trauma, recent stressful events, and  
32  
33 PTSD affect functional health status and health utilization in HIV-infected patients  
34  
35 in the south. *Psychosomatic medicine*. 2005;67:500–7.  
36  
37  
38
- 39 70. Olley BO, Gxamza F, Seedat S, *et al*. Psychopathology and coping in recently  
40  
41 diagnosed HIV/AIDS patients-the role of gender. *South African Medical Journal*.  
42  
43 2003;93:928–31.  
44  
45  
46
- 47 71. Vitiello B, Burnam MA, Bing EG, *et al*. Use of psychotropic medications among  
48  
49 HIV-infected patients in the United States. *American Journal of Psychiatry*.  
50  
51 2003;160:547–54.  
52  
53  
54
- 55 72. Martinez A, Israelski D, Walker C, *et al*. Posttraumatic stress disorder in women  
56  
57 attending human immunodeficiency virus outpatient clinics. *AIDS patient care and*  
58  
59  
60

- 1  
2  
3  
4  
5 *STDs*. 2002;16:283–91.
- 6  
7  
8 73. Koenen KC, Ratanatharathorn A, Ng L, *et al*. Posttraumatic stress disorder in the  
9  
10 World Mental Health Surveys. *Psychol Med*. 2017;47:2260–74.
- 11  
12  
13 74. Abbey G, Thompson SBN, Hickish T, *et al*. A meta-analysis of prevalence rates and  
14  
15 moderating factors for cancer-related post-traumatic stress disorder.  
16  
17 *Psychooncology*. 2015;24:371–81.
- 18  
19  
20 75. Siqveland J, Hussain A, Lindstrøm JC, *et al*. Prevalence of Posttraumatic Stress  
21  
22 Disorder in Persons with Chronic Pain: A Meta-analysis. *Frontiers in Psychiatry*.  
23  
24 2017;8:164.
- 25  
26  
27 76. Kelly B, Raphael B, Judd F, *et al*. Posttraumatic stress disorder in response to HIV  
28  
29 infection. *General Hospital Psychiatry*. 1998;20:345–52.
- 30  
31  
32 77. Bing EG, Burnam MA, Longshore D, *et al*. Psychiatric disorders and drug use  
33  
34 among human immunodeficiency virus–infected adults in the United States.  
35  
36 *Archives of general psychiatry*. 2001;58:721–8.
- 37  
38  
39 78. Pringsheim T, Jette N, Frolkis A, *et al*. The prevalence of Parkinson’s disease: A  
40  
41 systematic review and meta-analysis. *Movement disorders*. 2014;29:1583–90.
- 42  
43  
44 79. Wang T, Fu H, Kaminga AC, *et al*. Prevalence of depression or depressive  
45  
46 symptoms among people living with HIV/AIDS in China: a systematic review and  
47  
48 meta-analysis. *BMC psychiatry*. 2018 Dec;18(1):160.
- 49  
50  
51 80. Turan B, Budhwani H, Fazeli PL, *et al*. How Does Stigma Affect People Living  
52  
53 with HIV? The Mediating Roles of Internalized and Anticipated HIV Stigma in the  
54  
55  
56  
57  
58  
59  
60

- 1  
2  
3  
4  
5 Effects of Perceived Community Stigma on Health and Psychosocial Outcomes.  
6  
7 *AIDS Behav.* 2017;21:283–91.  
8  
9
- 10 81. Kamen C, Vorasarun C, Canning T, *et al.* The impact of stigma and social support  
11 on development of post-traumatic growth among persons living with HIV. *Journal*  
12 *of clinical psychology in medical settings.* 2016;23:126–34.  
13  
14
- 15 82. Lowther K, Selman L, Harding R, *et al.* Experience of persistent psychological  
16 symptoms and perceived stigma among people with HIV on antiretroviral therapy  
17 (ART): a systematic review. *International journal of nursing studies.*  
18 2014;51(8):1171-89.  
19  
20  
21  
22  
23  
24  
25  
26  
27
- 28 83. Li Z, Morano JP, Khoshnood K, *et al.* HIV-related stigma among people living with  
29 HIV/AIDS in rural Central China. *BMC Health Serv Res.* 2018;18:453.  
30  
31  
32
- 33 84. Li L, Liang L-J, Lin C, *et al.* HIV prevention intervention to reduce HIV-related  
34 stigma: evidence from China. *AIDS (London, England).* 2010;24:115.  
35  
36  
37  
38
- 39 85. Shavitt S, Cho YI, Johnson TP, *et al.* Culture Moderates the Relation Between  
40 Perceived Stress, Social Support, and Mental and Physical Health. *Journal of Cross-*  
41 *Cultural Psychology.* 2016;47:956–80.  
42  
43  
44  
45
- 46 86. Lauber C, Rössler W. Stigma towards people with mental illness in developing  
47 countries in Asia. *International Review of Psychiatry.* 2007;19:157–78.  
48  
49  
50
- 51 87. Seeman N, Tang S, Brown AD, *et al.* World survey of mental illness stigma.  
52 *Journal of Affective Disorders.* 2016;190:115–21.  
53  
54  
55  
56
- 57 88. Reisner SL, Mimiaga MJ, Safren SA, *et al.* Stressful or traumatic life events, post-  
58  
59  
60

1  
2  
3  
4  
5 traumatic stress disorder (PTSD) symptoms, and HIV sexual risk taking among men  
6  
7 who have sex with men. *AIDS care*. 2009;21:1481–9.

8  
9  
10 89. Luo Z, Feng T, Fu H, *et al*. Lifetime prevalence of suicidal ideation among men  
11  
12 who have sex with men: a meta-analysis. *BMC psychiatry*. 2017;17:406.

13  
14  
15 90. Hagan H, Jordan AE, Neurer J, *et al*. Incidence of sexually transmitted hepatitis C  
16  
17 virus infection in HIV-positive men who have sex with men. *AIDS*. 2015;29:2335–  
18  
19 45.

20  
21  
22  
23 91. Ayers S, Wright DB, Ford E. Hyperarousal symptoms after traumatic and  
24  
25 nontraumatic births. *Journal of Reproductive and Infant Psychology*. 2015;33:282–  
26  
27 93.

28  
29  
30  
31 92. Melsen WG, Bootsma MC, Rovers MM, *et al*. The effects of clinical and statistical  
32  
33 heterogeneity on the predictive values of results from meta-analyses. *Clinical*  
34  
35 *Microbiology and Infection*. 2014;20(2):123-9.



Figure 1 Flow chart of study inclusion

300x250mm (96 x 96 DPI)



Figure 2 Forest plot presenting the prevalence of PTSD in PLWH

281x304mm (300 x 300 DPI)

## Appendix 1 – Search strategy

| ID     | Search terms                                                                                                                                                                                                                                                                                                                                                                                                                                                                                                                                                                                                                    |
|--------|---------------------------------------------------------------------------------------------------------------------------------------------------------------------------------------------------------------------------------------------------------------------------------------------------------------------------------------------------------------------------------------------------------------------------------------------------------------------------------------------------------------------------------------------------------------------------------------------------------------------------------|
| PubMed |                                                                                                                                                                                                                                                                                                                                                                                                                                                                                                                                                                                                                                 |
| #1     | ("stress disorders, post-traumatic"[Mesh] OR PTSD*[tiab] OR posttrauma*[tiab] OR "post trauma*" [tiab]OR post-trauma*[tiab] OR trauma* [tiab] OR psychotrauma*[tiab] OR stress*[tiab])                                                                                                                                                                                                                                                                                                                                                                                                                                          |
| #2     | ("HIV Infections"[Mesh] OR "HIV" [MeSH] OR "human immunodeficiency virus" [tiab] OR "human immuno deficiency virus" [tiab] OR "human immune deficiency virus" [tiab] OR "human immunodeficiency virus" [tiab] OR "AIDS" [tiab] OR "acquired immunodeficiency syndrome" [tiab] OR "acquired immunodeficiency syndromes" [tiab] OR "acquired immuno deficiency syndrome" [tiab] OR "acquired immuno deficiency syndromes" [tiab] OR "acquired immune deficiency syndrome" [tiab] OR "acquired immune deficiency syndromes" [tiab] OR "acquired immunodeficiency syndrome" [tiab] OR "acquired immunodeficiency syndromes" [tiab]) |
| #3     | ((((((((("Prevalence"[Mesh] OR "Epidemiology"[Mesh] OR "Cross-Sectional Studies"[Mesh])) OR Prevalence) OR Epidemiology) OR Cross-Sectional Studies) OR "Longitudinal Studies"[Mesh]) OR "Cohort Studies"[Mesh]) OR Cohort Studies) OR Longitudinal Studies))                                                                                                                                                                                                                                                                                                                                                                   |
| #4     | #1 AND #2 AND #3                                                                                                                                                                                                                                                                                                                                                                                                                                                                                                                                                                                                                |

### Search Filters

- a. Human studies
- b. Language – English/Chinese
- c. Publication dates – From 2000/01/01 to 2019/11/31

## Appendix 2 – Risk of bias and quality of included studies

| Country      | Year | Citation        | 1   | 2   | 3   | 4       | 5       | 6   | 7   | 8   | 9   | 10  | 11  | Quality  |
|--------------|------|-----------------|-----|-----|-----|---------|---------|-----|-----|-----|-----|-----|-----|----------|
| USA          | 2019 | Fabian 2019     | yes | yes | no  | unclear | unclear | no  | no  | yes | no  | yes | yes | moderate |
| China        | 2018 | Cheng 2018      | yes | yes | yes | unclear | unclear | yes | no  | no  | no  | no  | no  | moderate |
| South Africa | 2018 | Spies 2018      | yes | yes | no  | no      | unclear | yes | no  | yes | no  | no  | no  | moderate |
| Zimbabwe     | 2018 | Verhey 2018     | yes | yes | yes | no      | unclear | yes | yes | no  | no  | yes | no  | moderate |
| China        | 2018 | Gao 2018        | yes | yes | yes | no      | unclear | no  | no  | yes | no  | no  | no  | moderate |
| USA          | 2017 | McLean 2017     | yes | yes | yes | no      | unclear | yes | yes | yes | no  | yes | no  | moderate |
| USA          | 2017 | Kemppainen 2017 | yes | yes | no  | no      | unclear | no  | no  | no  | no  | no  | no  | low      |
| USA          | 2016 | Gonzalez 2016   | yes | yes | yes | no      | unclear | yes | yes | yes | no  | yes | no  | moderate |
| USA          | 2016 | Rubin 2016      | yes | yes | yes | no      | no      | no  | yes | yes | yes | yes | no  | moderate |
| USA          | 2016 | John 2016       | yes | no  | yes | yes     | no      | yes | no  | no  | no  | no  | no  | moderate |
| USA          | 2016 | Julnes 2016     | yes | yes | yes | no      | unclear | no  | yes | yes | no  | no  | no  | moderate |
| China        | 2016 | Zhang 2016      | yes | yes | no  | no      | no      | no  | no  | no  | no  | yes | no  | low      |
| USA          | 2015 | Battaglia 2015  | yes | yes | yes | no      | unclear | no  | no  | no  | no  | yes | no  | moderate |
| South Africa | 2015 | Hansrod 2015    | yes | yes | yes | no      | unclear | yes | no  | yes | no  | no  | no  | moderate |
| USA          | 2015 | Brownley 2015   | yes | yes | yes | unclear | unclear | no  | no  | no  | no  | yes | no  | moderate |
| USA          | 2014 | Malee 2014      | yes | yes | yes | no      | unclear | no  | yes | yes | yes | yes | yes | high     |
| USA          | 2014 | Glémaud 2014    | yes | yes | yes | unclear | unclear | no  | no  | no  | no  | no  | no  | low      |



1  
2  
3  
4  
5  
6  
7  
8  
9  
10  
11  
12  
13  
14  
15  
16  
17  
18  
19  
20  
21  
22  
23  
24  
25  
26  
27  
28  
29  
30  
31  
32  
33  
34  
35  
36  
37  
38  
39  
40  
41  
42  
43  
44  
45  
46  
47

|              |      |                  |     |     |     |         |         |     |     |     |     |     |     |          |
|--------------|------|------------------|-----|-----|-----|---------|---------|-----|-----|-----|-----|-----|-----|----------|
| USA          | 2013 | Gore-Felton 2013 | yes | yes | no  | no      | unclear | yes | no  | no  | no  | no  | no  | low      |
| USA          | 2013 | Glover 2013      | yes | yes | no  | unclear | unclear | yes | yes | yes | yes | yes | yes | high     |
| Haiti        | 2013 | Dévioux 2013     | yes | yes | yes | no      | unclear | no  | no  | yes | no  | no  | no  | moderate |
| Rwanda       | 2013 | Gard 2013        | yes | yes | yes | unclear | no      | no  | yes | yes | no  | yes | no  | moderate |
| Gambia       | 2012 | Peterson 2012    | yes | yes | yes | yes     | yes     | no  | yes | yes | yes | yes | no  | high     |
| Uganda       | 2011 | Kinyanda 2011    | yes | yes | yes | yes     | unclear | no  | yes | yes | no  | yes | no  | moderate |
| USA          | 2011 | Bogart 2011      | yes | yes | yes | no      | unclear | no  | yes | yes | no  | no  | no  | moderate |
| UK           | 2011 | Martin 2011      | yes | yes | yes | no      | unclear | no  | no  | no  | no  | yes | no  | moderate |
| USA          | 2011 | Reisner 2011     | yes | yes | yes | no      | unclear | no  | yes | yes | yes | no  | no  | moderate |
| UK           | 2010 | Theunink 2010    | yes | no  | no  | no      | no      | no  | no  | no  | no  | no  | no  | low      |
| South Africa | 2010 | Joska 2010       | yes | yes | no  | unclear | unclear | yes | no  | yes | yes | no  | no  | moderate |
| Nigeria      | 2009 | Adewuya 2009     | yes | yes | no  | no      | unclear | no  | no  | yes | no  | yes | no  | moderate |
| South Africa | 2009 | Spies 2009       | yes | yes | no  | no      | unclear | yes | no  | yes | no  | yes | no  | moderate |
| South Africa | 2008 | Fincham 2008     | yes | yes | yes | yes     | unclear | no  | yes | yes | yes | no  | no  | moderate |
| USA          | 2007 | Zanjani 2007     | yes | yes | yes | no      | unclear | no  | no  | yes | yes | no  | no  | moderate |
| USA          | 2007 | Israelski 2007   | yes | yes | yes | unclear | unclear | no  | no  | no  | no  | no  | no  | low      |
| USA          | 2006 | Boarts 2006      | yes | no  | no  | no      | unclear | yes | yes | yes | no  | no  | yes | moderate |
| USA          | 2005 | Leserman 2005    | yes | yes | no  | yes     | no      | no  | yes | yes | yes | yes | no  | high     |
| South Africa | 2003 | Olley 2003       | yes | yes | no  | yes     | unclear | no  | no  | yes | no  | no  | no  | moderate |

|     |      |                  |     |     |    |     |         |    |     |    |    |     |     |          |
|-----|------|------------------|-----|-----|----|-----|---------|----|-----|----|----|-----|-----|----------|
| USA | 2003 | Vitiello<br>2003 | yes | no  | no | no  | unclear | no | yes | no | no | yes | yes | moderate |
| USA | 2002 | Martinez<br>2002 | yes | yes | no | yes | unclear | no | yes | no | no | yes | no  | moderate |

Risk of bias was assessed using the Agency for Healthcare Research and Quality (AHRQ). The checklist included 11 items. Each item was coded with a “yeses/No/Unclear”: “No” or “Unclear” was scored “0”, and “yeses” was scored “1”. Total score out of 11 where 8-11, 4-7, and 0-3 depict high, moderate and low quality, respectively.

# MOOSE Checklist

| Items                                                                                                                                                                                                                                                           | Page #     | Comments       |
|-----------------------------------------------------------------------------------------------------------------------------------------------------------------------------------------------------------------------------------------------------------------|------------|----------------|
| <b>TITLE</b> Identify the study as a meta-analysis (or systematic review)                                                                                                                                                                                       | 3          |                |
| <b>ABSTRACT</b> Use the journal's structured format                                                                                                                                                                                                             | 3,4        |                |
| <b>INTRODUCTION</b>                                                                                                                                                                                                                                             |            |                |
| · The clinical problem                                                                                                                                                                                                                                          | 5,6        |                |
| · The hypothesis                                                                                                                                                                                                                                                | 5          |                |
| · A statement of objectives that includes the study population, the condition of interest, the exposure or intervention, and the outcome(s) considered                                                                                                          | 7          |                |
| <b>SOURCES</b>                                                                                                                                                                                                                                                  |            |                |
| · Qualifications of searchers (eg, librarians and investigators)                                                                                                                                                                                                | 8          | 1 psychiatrist |
| · Search strategy, including time period included in the synthesis and keywords                                                                                                                                                                                 | 7,8        |                |
| · Effort to include all available studies, including contact with authors                                                                                                                                                                                       | 8          |                |
| · Databases and registries searched                                                                                                                                                                                                                             | 7          |                |
| · Search software used, name and version, including special features used (eg, explosion)                                                                                                                                                                       | -          |                |
| · Use of hand searching (eg, reference lists of obtained articles)                                                                                                                                                                                              | 8          |                |
| · List of citations located and those excluded, including justification                                                                                                                                                                                         | figure 1   |                |
| · Method of addressing articles published in languages other than English                                                                                                                                                                                       | 7          |                |
| · Method of handling abstracts and unpublished studies                                                                                                                                                                                                          | -          | Not applicable |
| · Description of any contact with authors                                                                                                                                                                                                                       | -          |                |
| <b>STUDY SELECTION</b>                                                                                                                                                                                                                                          |            |                |
| · Types of study designs considered                                                                                                                                                                                                                             | 8          | Observational  |
| · Relevance or appropriateness of studies gathered for assessing the hypothesis to be tested                                                                                                                                                                    | 7,8        |                |
| · Rationale for the selection and coding of data (eg, sound clinical principles or convenience)                                                                                                                                                                 | 7,8        |                |
| · Documentation of how data were classified and coded (eg, multiple raters, blinding, etc)                                                                                                                                                                      | 8,9        |                |
| · Assessment of confounding (eg, comparability of cases and controls in studies where appropriate)                                                                                                                                                              | -          | Not applicable |
| · Assessment of study quality, including blinding of quality assessors; stratification or regression on possible predictors of study results                                                                                                                    | 9,10       |                |
| · Assessment of heterogeneity                                                                                                                                                                                                                                   | 10         |                |
| · Statistical methods (eg, complete description of fixed or random effects models, justification of whether the chosen models account for predictors of study results, dose-response models, or cumulative meta-analysis) in sufficient detail to be replicated | 10         |                |
| <b>RESULTS</b>                                                                                                                                                                                                                                                  |            |                |
| · A graph summarizing individual study estimates and the overall estimate                                                                                                                                                                                       | Figure 1,2 |                |
| · A table giving descriptive information for each included study                                                                                                                                                                                                | Tables 1   |                |
| · Results of sensitivity testing (eg, subgroup analysis)                                                                                                                                                                                                        | 17,18      |                |
| · Indication of statistical uncertainty of findings                                                                                                                                                                                                             | 17         |                |
| <b>DISCUSSION</b>                                                                                                                                                                                                                                               |            |                |
| · Strengths and weaknesses                                                                                                                                                                                                                                      | 22-27      |                |
| · Potential biases in the review process (eg, publication bias)                                                                                                                                                                                                 | 27         |                |
| · Justification for exclusion (eg, exclusion of non-English-language citations)                                                                                                                                                                                 | -          |                |
| · Assessment of quality of included studies                                                                                                                                                                                                                     | 26         |                |
| · Consideration of alternative explanations for observed results                                                                                                                                                                                                | 27         |                |
| · Generalization of the conclusions (ie, appropriate for the data presented and within the domain of the literature review)                                                                                                                                     | 28         |                |
| · Guidelines for future research                                                                                                                                                                                                                                | 27,28      |                |
| · Disclosure of funding source                                                                                                                                                                                                                                  | 29         |                |
