# Supplementary material for: Global estimate of the prevalence of post-traumatic stress disorder among adults living with HIV: a systematic review and meta-analysis
Source: PubMed Central journal article supplement — BMJ Open. 2020 Apr 27;10(4):e032435. doi: 10.1136/bmjopen-2019-032435 (PMC7213849; doi:10.1136/bmjopen-2019-032435), 2020-04-27
Supplement: bmjopen-2019-032435supp001.pdf [file bmjopen-2019-032435supp001.pdf]

### Appendix 1 – Search strategy

| ID     | Search terms                                                                                                                                                                                                                                                                                                                                                                                                                                                                                                                                                                                                                    |
|--------|---------------------------------------------------------------------------------------------------------------------------------------------------------------------------------------------------------------------------------------------------------------------------------------------------------------------------------------------------------------------------------------------------------------------------------------------------------------------------------------------------------------------------------------------------------------------------------------------------------------------------------|
| PubMed |                                                                                                                                                                                                                                                                                                                                                                                                                                                                                                                                                                                                                                 |
| #1     | ("stress disorders, post-traumatic"[Mesh] OR PTSD*[tiab] OR posttrauma*[tiab] OR "post trauma*" [tiab]OR post-trauma*[tiab] OR trauma* [tiab] OR psychotrauma*[tiab] OR stress*[tiab])                                                                                                                                                                                                                                                                                                                                                                                                                                          |
| #2     | ("HIV Infections"[Mesh] OR "HIV" [MeSH] OR "human immunodeficiency virus" [tiab] OR "human immuno deficiency virus" [tiab] OR "human immune deficiency virus" [tiab] OR "human immunodeficiency virus" [tiab] OR "AIDS" [tiab] OR "acquired immunodeficiency syndrome" [tiab] OR "acquired immunodeficiency syndromes" [tiab] OR "acquired immuno deficiency syndrome" [tiab] OR "acquired immuno deficiency syndromes" [tiab] OR "acquired immune deficiency syndrome" [tiab] OR "acquired immune deficiency syndromes" [tiab] OR "acquired immunodeficiency syndrome" [tiab] OR "acquired immunodeficiency syndromes" [tiab]) |
| #3     | ((((((("Prevalence"[Mesh] OR "Epidemiology"[Mesh] OR "Cross-Sectional Studies"[Mesh])) OR Prevalence) OR Epidemiology) OR Cross-Sectional Studies) OR "Longitudinal Studies"[Mesh]) OR "Cohort Studies"[Mesh]) OR Cohort Studies) OR Longitudinal Studies))                                                                                                                                                                                                                                                                                                                                                                     |
| #4     | #1 AND #2 AND #3                                                                                                                                                                                                                                                                                                                                                                                                                                                                                                                                                                                                                |

#### Search Filters

- a. Human studies
- b. Language – English/Chinese
- c. Publication dates – From 2000/01/01 to 2019/11/31
