# Supplementary material for: Global estimate of the prevalence of post-traumatic stress disorder among adults living with HIV: a systematic review and meta-analysis
Source: PubMed Central journal article supplement — BMJ Open. 2020 Apr 27;10(4):e032435. doi: 10.1136/bmjopen-2019-032435 (PMC7213849; doi:10.1136/bmjopen-2019-032435), 2020-04-27
Supplement: bmjopen-2019-032435supp002.pdf [file bmjopen-2019-032435supp002.pdf]

### Appendix 2 – Risk of bias and quality of included studies

| Country      | Year | Citation        | 1   | 2   | 3   | 4       | 5       | 6   | 7   | 8   | 9   | 10  | 11  | Quality  |
|--------------|------|-----------------|-----|-----|-----|---------|---------|-----|-----|-----|-----|-----|-----|----------|
| USA          | 2019 | Fabian 2019     | yes | yes | no  | unclear | unclear | no  | no  | yes | no  | yes | yes | moderate |
| China        | 2018 | Cheng 2018      | yes | yes | yes | unclear | unclear | yes | no  | no  | no  | no  | no  | moderate |
| South Africa | 2018 | Spies 2018      | yes | yes | no  | no      | unclear | yes | no  | yes | no  | no  | no  | moderate |
| Zimbabwe     | 2018 | Verhey 2018     | yes | yes | yes | no      | unclear | yes | yes | no  | no  | yes | no  | moderate |
| China        | 2018 | Gao 2018        | yes | yes | yes | no      | unclear | no  | no  | yes | no  | no  | no  | moderate |
| USA          | 2017 | McLean 2017     | yes | yes | yes | no      | unclear | yes | yes | yes | no  | yes | no  | moderate |
| USA          | 2017 | Kemppainen 2017 | yes | yes | no  | no      | unclear | no  | no  | no  | no  | no  | no  | low      |
| USA          | 2016 | Gonzalez 2016   | yes | yes | yes | no      | unclear | yes | yes | yes | no  | yes | no  | moderate |
| USA          | 2016 | Rubin 2016      | yes | yes | yes | no      | no      | no  | yes | yes | yes | yes | no  | moderate |
| USA          | 2016 | John 2016       | yes | no  | yes | yes     | no      | yes | no  | no  | no  | no  | no  | moderate |
| USA          | 2016 | Julnes 2016     | yes | yes | yes | no      | unclear | no  | yes | yes | no  | no  | no  | moderate |
| China        | 2016 | Zhang 2016      | yes | yes | no  | no      | no      | no  | no  | no  | no  | yes | no  | low      |
| USA          | 2015 | Battaglia 2015  | yes | yes | yes | no      | unclear | no  | no  | no  | no  | yes | no  | moderate |
| South Africa | 2015 | Hansrod 2015    | yes | yes | yes | no      | unclear | yes | no  | yes | no  | no  | no  | moderate |
| USA          | 2015 | Brownley 2015   | yes | yes | yes | unclear | unclear | no  | no  | no  | no  | yes | no  | moderate |
| USA          | 2014 | Malee 2014      | yes | yes | yes | no      | unclear | no  | yes | yes | yes | yes | yes | high     |
| USA          | 2014 | Glémaud 2014    | yes | yes | yes | unclear | unclear | no  | no  | no  | no  | no  | no  | low      |

|              |      |                  |     |     |     |         |         |     |     |     |     |     |     |          |
|--------------|------|------------------|-----|-----|-----|---------|---------|-----|-----|-----|-----|-----|-----|----------|
| USA          | 2013 | Gore-Felton 2013 | yes | yes | no  | no      | unclear | yes | no  | no  | no  | no  | no  | low      |
| USA          | 2013 | Glover 2013      | yes | yes | no  | unclear | unclear | yes | yes | yes | yes | yes | yes | high     |
| Haiti        | 2013 | Dévioux 2013     | yes | yes | yes | no      | unclear | no  | no  | yes | no  | no  | no  | moderate |
| Rwanda       | 2013 | Gard 2013        | yes | yes | yes | unclear | no      | no  | yes | yes | no  | yes | no  | moderate |
| Gambia       | 2012 | Peterson 2012    | yes | yes | yes | yes     | yes     | no  | yes | yes | yes | yes | no  | high     |
| Uganda       | 2011 | Kinyanda 2011    | yes | yes | yes | yes     | unclear | no  | yes | yes | no  | yes | no  | moderate |
| USA          | 2011 | Bogart 2011      | yes | yes | yes | no      | unclear | no  | yes | yes | no  | no  | no  | moderate |
| UK           | 2011 | Martin 2011      | yes | yes | yes | no      | unclear | no  | no  | no  | no  | yes | no  | moderate |
| USA          | 2011 | Reisner 2011     | yes | yes | yes | no      | unclear | no  | yes | yes | yes | no  | no  | moderate |
| UK           | 2010 | Theunink 2010    | yes | no  | no  | no      | no      | no  | no  | no  | no  | no  | no  | low      |
| South Africa | 2010 | Joska 2010       | yes | yes | no  | unclear | unclear | yes | no  | yes | yes | no  | no  | moderate |
| Nigeria      | 2009 | Adewuya 2009     | yes | yes | no  | no      | unclear | no  | no  | yes | no  | yes | no  | moderate |
| South Africa | 2009 | Spies 2009       | yes | yes | no  | no      | unclear | yes | no  | yes | no  | yes | no  | moderate |
| South Africa | 2008 | Fincham 2008     | yes | yes | yes | yes     | unclear | no  | yes | yes | yes | no  | no  | moderate |
| USA          | 2007 | Zanjani 2007     | yes | yes | yes | no      | unclear | no  | no  | yes | yes | no  | no  | moderate |
| USA          | 2007 | Israelski 2007   | yes | yes | yes | unclear | unclear | no  | no  | no  | no  | no  | no  | low      |
| USA          | 2006 | Boarts 2006      | yes | no  | no  | no      | unclear | yes | yes | yes | no  | no  | yes | moderate |
| USA          | 2005 | Leserman 2005    | yes | yes | no  | yes     | no      | no  | yes | yes | yes | yes | no  | high     |
| South Africa | 2003 | Olley 2003       | yes | yes | no  | yes     | unclear | no  | no  | yes | no  | no  | no  | moderate |

|     |      |                  |     |     |    |     |         |    |     |    |    |     |     |          |
|-----|------|------------------|-----|-----|----|-----|---------|----|-----|----|----|-----|-----|----------|
| USA | 2003 | Vitiello<br>2003 | yes | no  | no | no  | unclear | no | yes | no | no | yes | yes | moderate |
| USA | 2002 | Martinez<br>2002 | yes | yes | no | yes | unclear | no | yes | no | no | yes | no  | moderate |

Risk of bias was assessed using the Agency for Healthcare Research and Quality (AHRQ). The checklist included 11 items. Each item was coded with a “yeses/No/Unclear”: “No” or “Unclear” was scored “0”, and “yeses” was scored “1”. Total score out of 11 where 8-11, 4-7, and 0-3 depict high, moderate and low quality, respectively.
